# Supplementary material for: High-quality, genome-wide SNP genotypic data for pedigreed germplasm of the diploid outbreeding species apple, peach, and sweet cherry through a common workflow
Source: PubMed Central journal article supplement (PMC6597046; doi:10.1371/journal.pone.0210928), 2019-06-27
Supplement: pone.0210928.s016.pdf [file pone.0210928.s016.pdf]

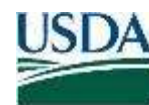

United States  
Department of  
Agriculture

National Institute  
of Food and  
Agriculture

# High-quality, genome-wide SNP genotypic data for pedigreed germplasm of the diploid outbreeding species apple, peach, and sweet cherry through a common workflow

Stijn Vanderzande, Nicholas P Howard, Lichun Cai, Cassia Da Silva Linge, Laima Antanaviciute, Marco CAM Bink, Johannes W Kruisselbrink, Nahla Bassil, Ksenija Gasic, Amy Iezzoni, Eric Van de Weg, Cameron Peace

S4 File: Hands-on guideline on how to perform data curation using the steps described in this study

## RosBREED

DISEASE  
RESISTANCE

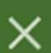

HORTICULTURAL  
QUALITY

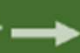

SUPERIOR  
CULTIVARS

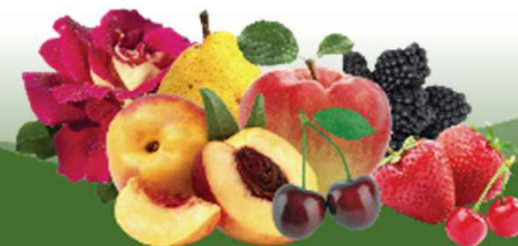

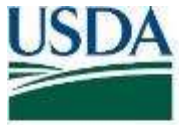

United States  
Department of  
Agriculture

National Institute  
of Food and  
Agriculture

# Input data for Infinium arrays

## RosBREED

DISEASE RESISTANCE × HORTICULTURAL QUALITY → SUPERIOR CULTIVARS

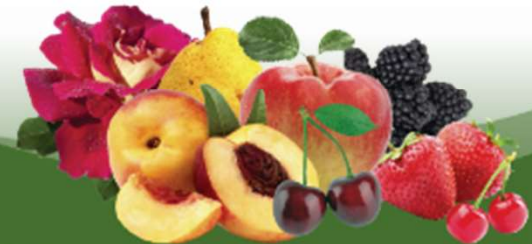

# iSCAN data

Results for 1 array  
(24 samples)

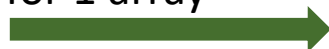

Sample sheet(s)  
(.csv or .xls(x)format)

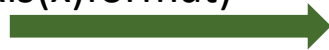

| Name                    | Date modified      | Type                 | Size  |
|-------------------------|--------------------|----------------------|-------|
| 202017910001            | 9/26/2018 12:33 PM | File folder          |       |
| 202017910002            | 9/26/2018 12:33 PM | File folder          |       |
| 202017910004            | 9/26/2018 12:33 PM | File folder          |       |
| 202017910005            | 9/26/2018 12:33 PM | File folder          |       |
| 202017910007            | 9/26/2018 12:33 PM | File folder          |       |
| 202017910014            | 9/26/2018 12:33 PM | File folder          |       |
| 202017910021            | 9/26/2018 12:33 PM | File folder          |       |
| 202017910025            | 9/26/2018 12:34 PM | File folder          |       |
| 202017910036            | 9/26/2018 12:34 PM | File folder          |       |
| 202017910037            | 9/26/2018 12:34 PM | File folder          |       |
| 202017910042            | 9/26/2018 12:34 PM | File folder          |       |
| 202017910045            | 9/26/2018 12:34 PM | File folder          |       |
| SweetCherry 062818.csv  | 7/20/2018 10:25 AM | Microsoft Excel C... | 16 KB |
| SweetCherry 062818.xlsx | 7/20/2018 10:21 AM | Microsoft Excel W... | 29 KB |

Manifest file received separately (.bpm format; describes probe content of the array)

|                                            |                    |          |          |
|--------------------------------------------|--------------------|----------|----------|
| RosBREED_Cherry_15k_15069617X343343_A1.bpm | 7/20/2018 10:02 AM | BPM File | 2,487 KB |
|--------------------------------------------|--------------------|----------|----------|

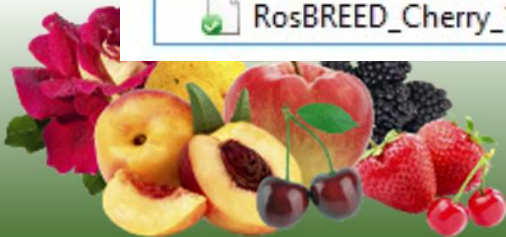

**RosBREED**  
DISEASE RESISTANCE × HORTICULTURAL QUALITY

# iSCAN data

In result folder of an array

Results for  
1 sample

|                                                                                     |                                                |                    |            |          |
|-------------------------------------------------------------------------------------|------------------------------------------------|--------------------|------------|----------|
|    | 202017910001.sdf                               | 6/21/2018 10:10 AM | SDF File   | 32 KB    |
|    | 202017910001_qc.txt                            | 6/28/2018 10:04 AM | TXT File   | 11 KB    |
|    | 202017910001_R01C01_1_Focus_scan#1_swath#1_... | 6/28/2018 9:36 AM  | JPEG image | 214 KB   |
|    | 202017910001_R01C01_1_Green.xml                | 6/28/2018 9:37 AM  | XML File   | 2 KB     |
|    | 202017910001_R01C01_1_Red.xml                  | 6/28/2018 9:37 AM  | XML File   | 2 KB     |
|    | 202017910001_R01C01_1-Swath1_Grn.jpg           | 6/28/2018 9:36 AM  | JPEG image | 2,100 KB |
|    | 202017910001_R01C01_1-Swath1_Red.jpg           | 6/28/2018 9:36 AM  | JPEG image | 1,983 KB |
|    | 202017910001_R01C01_Grn.idat                   | 6/28/2018 9:37 AM  | IDAT File  | 174 KB   |
|   | 202017910001_R01C01_Red.idat                   | 6/28/2018 9:37 AM  | IDAT File  | 174 KB   |
|  | 202017910001_R01C02_1_Focus_scan#1_swath#1_... | 6/28/2018 9:39 AM  | JPEG image | 210 KB   |
|  | 202017910001_R01C02_1_Green.xml                | 6/28/2018 9:39 AM  | XML File   | 2 KB     |
|  | 202017910001_R01C02_1_Red.xml                  | 6/28/2018 9:39 AM  | XML File   | 2 KB     |
|  | 202017910001_R01C02_1-Swath1_Grn.jpg           | 6/28/2018 9:39 AM  | JPEG image | 2,079 KB |

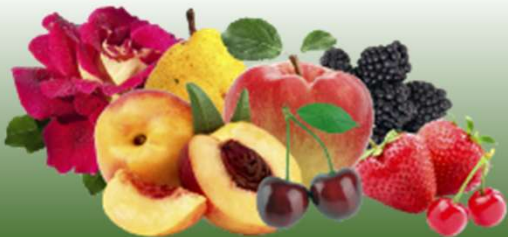

## RosBREED

DISEASE RESISTANCE × HORTICULTURAL QUALITY

# Sample sheet

|               | A        | B                                                                                                                                      | C                                      | D                 | E          | F      | G        | H         | I       | J       | K      | L |
|---------------|----------|----------------------------------------------------------------------------------------------------------------------------------------|----------------------------------------|-------------------|------------|--------|----------|-----------|---------|---------|--------|---|
| Run info      | 1        | [Header]                                                                                                                               |                                        |                   |            |        |          |           |         |         |        |   |
|               | 2        | Investigator Name                                                                                                                      |                                        |                   |            |        |          |           |         |         |        |   |
|               | 3        | Project Name                                                                                                                           |                                        |                   |            |        |          |           |         |         |        |   |
|               | 4        | Experiment Name                                                                                                                        |                                        |                   |            |        |          |           |         |         |        |   |
|               | 5        | Date                                                                                                                                   |                                        |                   |            |        |          |           |         |         |        |   |
| Manifest info | 6        | **NOTE**                                                                                                                               |                                        |                   |            |        |          |           |         |         |        |   |
|               | 7        | The following columns are required: Sample_ID, SentrrixBarcode_A, SentrrixPosition_A (and _B, _C etc.. if you have multiple manifests) |                                        |                   |            |        |          |           |         |         |        |   |
|               | 8        | All other columns are optional; any desired additional columns may be added here or "on the fly" during analysis                       |                                        |                   |            |        |          |           |         |         |        |   |
|               | 9        | Column order doesn't matter                                                                                                            |                                        |                   |            |        |          |           |         |         |        |   |
|               | 10       | [Manifests]                                                                                                                            |                                        |                   |            |        |          |           |         |         |        |   |
| Samples info  | 11       | A                                                                                                                                      | RosBREED_Cherry_15k_15069617X343343_A1 |                   |            |        |          |           |         |         |        |   |
|               | 12       | [Data]                                                                                                                                 |                                        |                   |            |        |          |           |         |         |        |   |
|               | 13       | Sample_ID                                                                                                                              | SampSample_Well                        | SentrrixBarcode_A | SentrrixPo | Gender | Sample_C | Replicate | Parent1 | Parent2 | Source |   |
|               | 14       | Rainier                                                                                                                                | A01                                    | 202017910001      | R01C01     |        | Chip1    |           |         |         | Cherry |   |
|               | 15       | Sandra_Rose                                                                                                                            | A02                                    | 202017910001      | R02C01     |        | Chip1    |           |         |         | Cherry |   |
|               | 16       | PC7144-11                                                                                                                              | A03                                    | 202017910001      | R03C01     |        | Chip1    |           |         |         | Cherry |   |
|               | 17       | 7147-9                                                                                                                                 | A04                                    | 202017910001      | R04C01     |        | Chip1    |           |         |         | Cherry |   |
|               | 18       | PC7309-4                                                                                                                               | A05                                    | 202017910001      | R05C01     |        | Chip1    |           |         |         | Cherry |   |
|               | 19       | 99F/132R4                                                                                                                              | A06                                    | 202017910001      | R06C01     |        | Chip1    |           |         |         | Cherry |   |
|               | 20       | Ambrunes                                                                                                                               | A07                                    | 202017910001      | R07C01     |        | Chip1    |           |         |         | Cherry |   |
| 21            | PC8011-6 | A08                                                                                                                                    | 202017910001                           | R08C01            |            | Chip1  |          |           |         | Cherry  |        |   |
| 22            | PC8012-5 | A09                                                                                                                                    | 202017910001                           | R09C01            |            | Chip1  |          |           |         | Cherry  |        |   |



**RosBREED**  
DISEASE RESISTANCE × HORTICULTURAL QUALITY



# Sample sheet – sample data

| Sample_ID   | Samp | Sample_Well | SentrixBarcode_A | SentrixPosition_A | Gender | Sample_C | Replicate | Parent1 | Parent2 | Source |
|-------------|------|-------------|------------------|-------------------|--------|----------|-----------|---------|---------|--------|
| Rainier     |      | A01         | 202017910001     | R01C01            |        | Chip1    |           |         |         | Cherry |
| Sandra_Rose |      | A02         | 202017910001     | R02C01            |        | Chip1    |           |         |         | Cherry |
| PC7144-11   |      | A03         | 202017910001     | R03C01            |        | Chip1    |           |         |         | Cherry |
| 7147-9      |      | A04         | 202017910001     | R04C01            |        | Chip1    |           |         |         | Cherry |
| PC7309-4    |      | A05         | 202017910001     | R05C01            |        | Chip1    |           |         |         | Cherry |

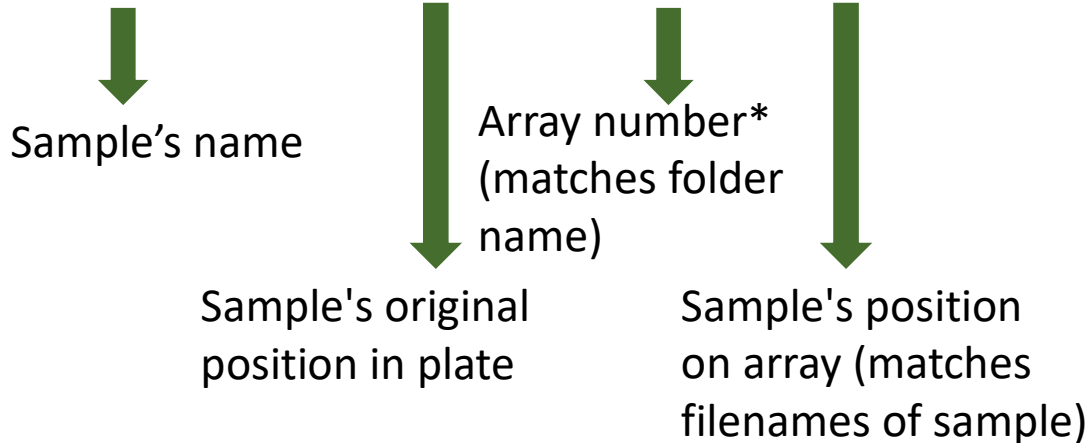

Often not filled in!

|                  |   |
|------------------|---|
| SentrixBarcode_A | S |
| 2.01382E+11      | R |
| 2.01382E+11      | R |
| 2.01382E+11      | R |
| 2.01382E+11      | R |
| 2.01382E+11      | R |
| 2.01382E+11      | R |
| 2.01382E+11      | R |
| 2.01382E+11      | R |

\*Sometimes saved as 'scientific number' and last digits can get lost when saved as ".csv" file (make a ".xls(x)" copy!)

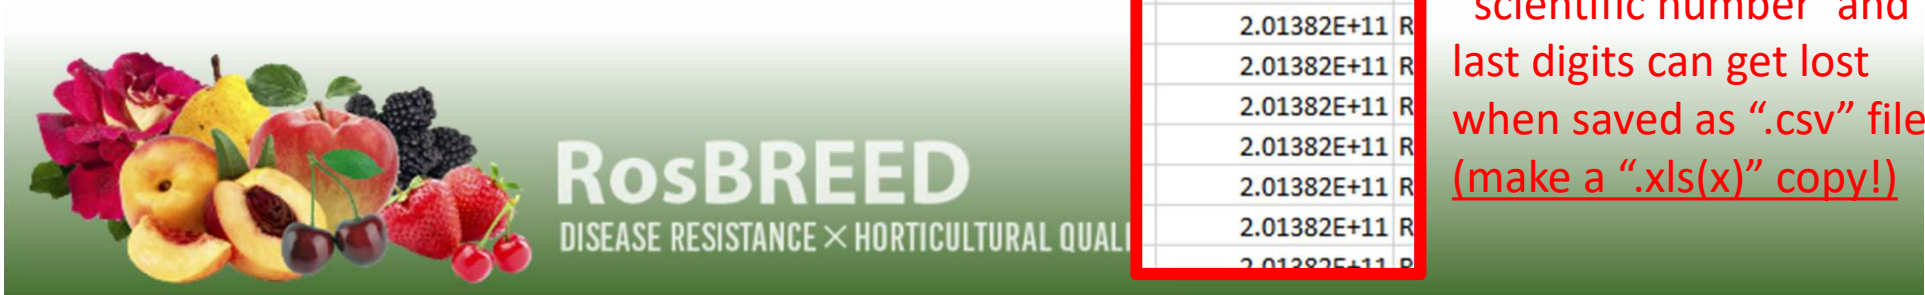

# Sample sheet – sample data

- Sample\_ID, SatrixBarcode\_A and SatrixPosition\_A are required, other columns are optional and many user-defined columns can be added, e.g.:
  - Alternative names
  - Tissue source
  - Subpopulation
  - Sample quality/ploidy (when known)
- Parent names must match names used under Sample\_ID (if present in data set)



**RosBREED**  
DISEASE RESISTANCE × HORTICULTURAL QUALITY

# Sample sheet – sample\_ID

- Check ‘Sample\_ID’ of samples
  - Sometimes typing errors occurred
- Many software don’t accept spaces in names
  - Create new ‘Sample\_ID’ column and save original Sample\_ID as ‘Sample\_ID\_Original’
  - Remove spaces from new ‘Sample\_ID’ column
  - Optional: Create abbreviated names for long names
- Parent and replicates names must match names used under new Sample\_ID (if present in data set)



**RosBREED**  
DISEASE RESISTANCE × HORTICULTURAL QUALITY



# Sample sheet – sample data

| 16  | Sample_ID         | Alternative_Name | Sample_Wt | SentrixBarcode | Sentrix | Gend | Sample | Replicate                    |
|-----|-------------------|------------------|-----------|----------------|---------|------|--------|------------------------------|
| 353 | Rainier           |                  | A01       | 202017910001   | R01C01  |      | Chip1  | <del>Rainier rep01</del>     |
| 354 | Rainier rep01     |                  | B08       | 201903100009   | R08C01  |      | Chip3  | Rainier                      |
| 355 | Regina            |                  | B03       | 202017910007   | R03C02  |      | Chip5  |                              |
| 356 | Salmo             |                  | B09       | 202017910036   | R09C02  |      | Chip 9 |                              |
| 357 | Sandra Rose       |                  | G05       | 201903100003   | R05C02  |      | Chip2  | <del>Sandra Rose rep01</del> |
| 358 | Sandra Rose rep01 |                  | A02       | 202017910001   | R02C01  |      | Chip1  | Sandra Rose                  |
| 359 | Santina           |                  | H02       | 202017910025   | R02C02  |      | Chip8  | <del>Santina rep01</del>     |
| 360 | Santina rep01     |                  | H05       | 201903100003   | R07C02  |      | Chip2  | Santina                      |

Will lead to 2 versions of same report

- Replicates

- Keep one original name
  - Easy to find in files generated in next steps
- Add rep numbers for other replicates
  - Refer to original name as replicate

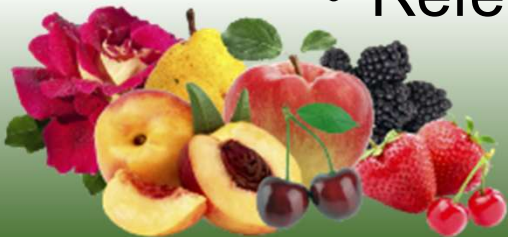

**RosBREED**  
DISEASE RESISTANCE × HORTICULTURAL QUALITY

# Combining sample sheets

- Move all array result folders into same folder (needed to load data)
  - GenomeStudio does not allow result folders to be spread across multiple subfolders
- Open first sample sheet and save first as new “.xls(x)” file (avoid loss of original sample sheet file and loss of array number)
  - Make sure data columns match
  - Paste data rows below existing data,
    - Repeat until all data is included



**RosBREED**  
DISEASE RESISTANCE × HORTICULTURAL QUALITY

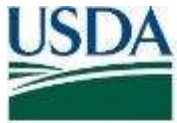

United States  
Department of  
Agriculture

National Institute  
of Food and  
Agriculture

# GenomeStudio®

## RosBREED

DISEASE  
RESISTANCE

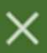

HORTICULTURAL  
QUALITY

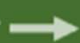

SUPERIOR  
CULTIVARS

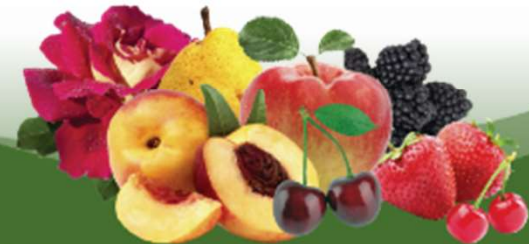

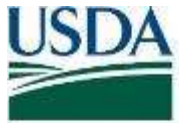

United States  
Department of  
Agriculture

National Institute  
of Food and  
Agriculture

# Loading Data

## RosBREED

DISEASE  
RESISTANCE



HORTICULTURAL  
QUALITY



SUPERIOR  
CULTIVARS

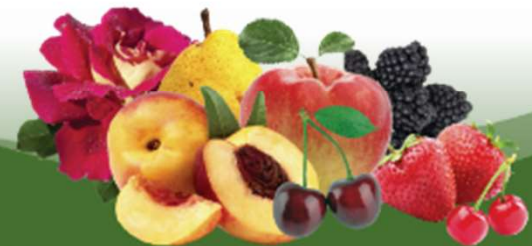

# GenomeStudio

Previously made projects

The screenshot displays the GenomeStudio interface. At the top, a menu bar includes File, Edit, View, Analysis, Tools, Window, and Help. Below the menu bar is a 'Start Page' section with a 'Recent Projects' table. A green box highlights this table, with an arrow pointing to the text 'Previously made projects'. The table lists several projects with columns for Project, Module, Directory, and Last Access. Below the table, a 'New Project' button is highlighted with a green box, with an arrow pointing to the text 'Start new project'. A 'File' menu is open, showing options like 'New Project', 'Open Project', 'Save Project', 'Close Project', 'Page Setup', 'Print Preview', 'Print...', 'Recent Project', and 'Exit'. A 'Directory' list is visible on the right side of the menu. At the bottom left, there is a 'Log' window showing system messages. The bottom of the slide features a decorative banner with images of various fruits (peaches, cherries, strawberries) and the text 'Ro DISEAS'.

| Project               | Module     | Directory                          | Last Access         |
|-----------------------|------------|------------------------------------|---------------------|
| Apple BR_UMN_1ay...   | Genotyping | C:\Users\stijn.vanderzande\Docu... | 5/1/2018 3:01 PM    |
| Aug18 Cherry_Goodl... | Genotyping | C:\Users\stijn.vanderzande\Docu... | 8/22/2018 10:57 AM  |
| Aug18 Cherry          | Genotyping | C:\Users\stijn.vanderzande\Docu... | 8/22/2018 10:57 AM  |
| Cherry G-5K           | Genotyping | C:\Users\stijn.vanderzande\Docu... | 3/1/2018 3:14 PM    |
| Nerehi 24_25          | Genotyping | C:\Users\stijn.vanderzande\Docu... | 3/4/2018 2:00 PM    |
| 1ay_Gax3pLextra.ind   | Genotyping | C:\Users\stijn.vanderzande\Docu... | 12/27/2017 11:42 AM |

File Edit View Analysis Tools Window Help

- New Project
- Open Project Ctrl+O
- Save Project Ctrl+S
- Save Project Copy As... Ctrl+Shift+A
- Close Project Ctrl+Shift+C
- Page Setup Ctrl+Shift+U
- Print Preview Ctrl+Shift+V
- Print... Ctrl+P
- Recent Project
- Exit Alt+F4

Directory

- C:\Users\stijn.vanderz
- C:\Users\stijn.vanderz
- C:\Users\stijn.vanderz
- C:\Users\stijn.vanderz
- C:\Users\stijn.vanderz
- C:\Users\stijn.vanderz

Log

| Time                 | Severity | Message                          |
|----------------------|----------|----------------------------------|
| 9/27/2018 6:09:12 PM | INFO     | Setting Hierarchy and Replicates |
| 9/27/2018 6:08:12 PM | INFO     | A new project has been created.  |

Ro DISEAS



# Loading data

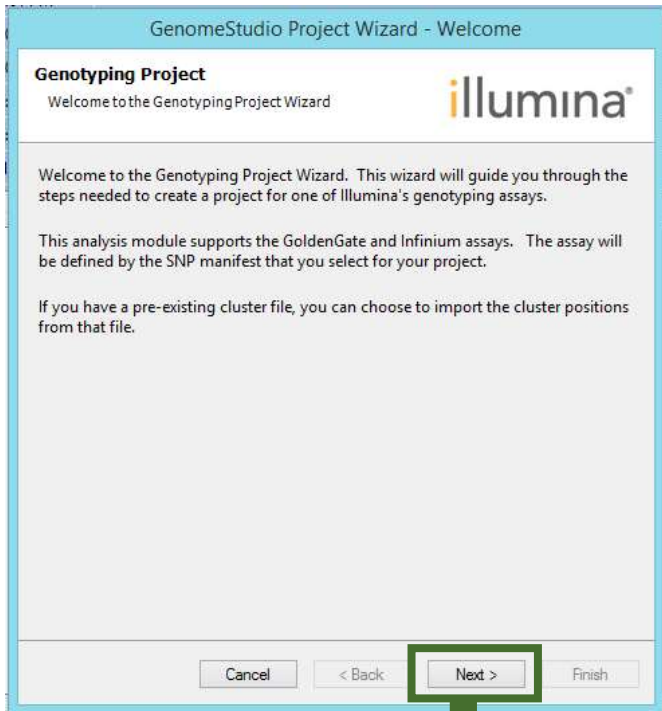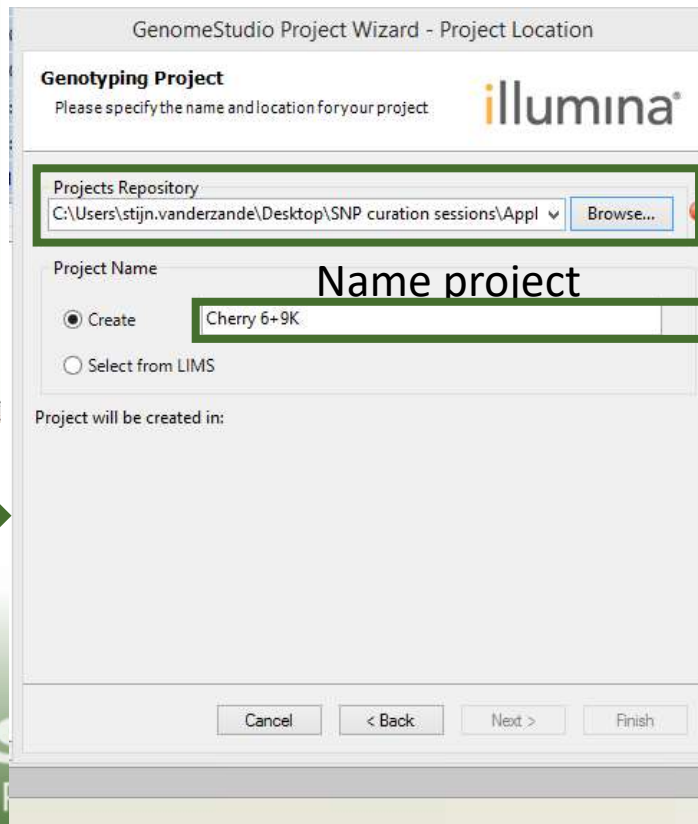

Location to save project

Name project

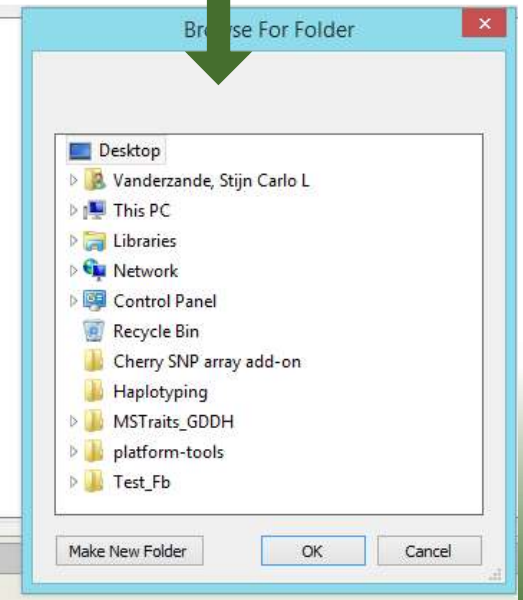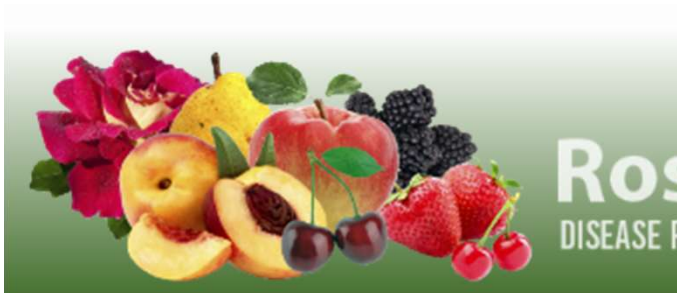

# Loading data

1 sample sheet file is loaded here

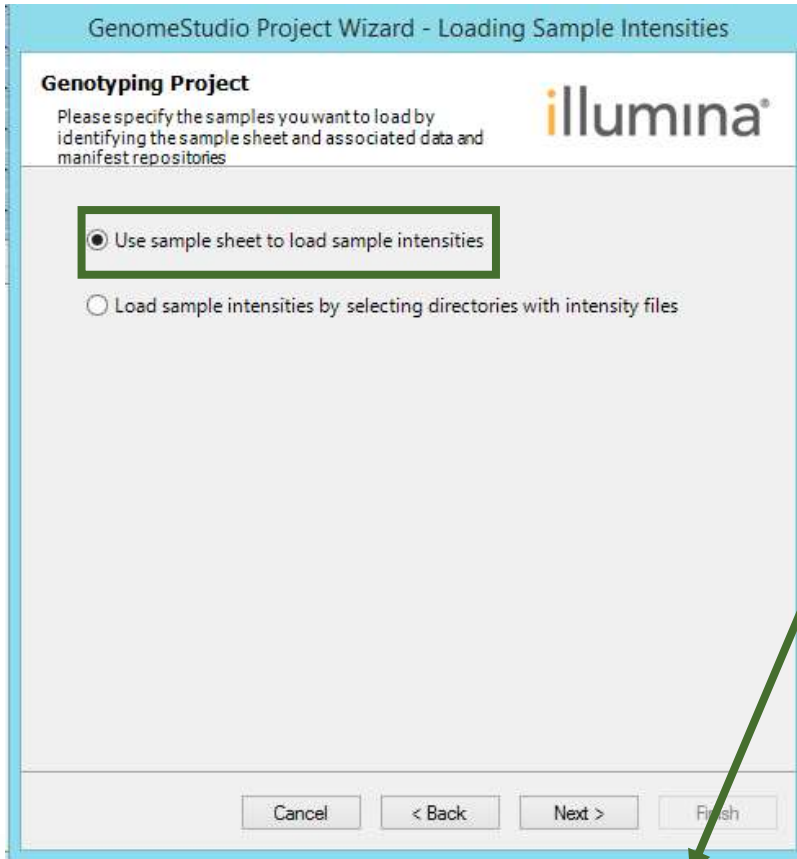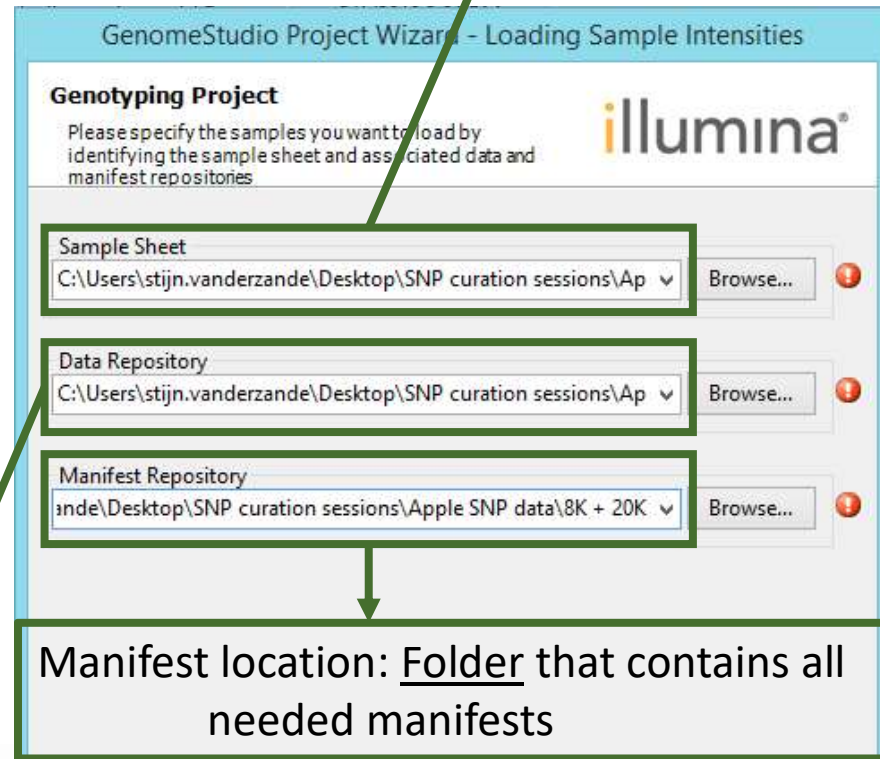

Manifest location: Folder that contains all needed manifests

Data location: Folder that contains all needed SNP array folders

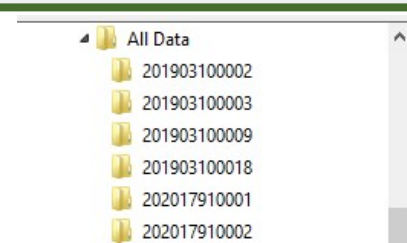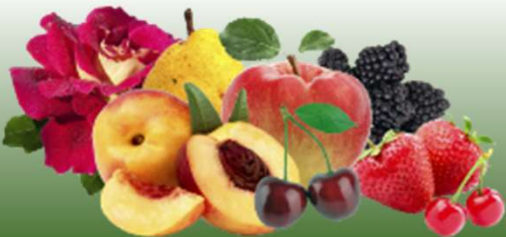

# Loading data

GenomeStudio Project Wizard - Cluster Positions

**Genotyping Project**

If you have an existing cluster file that you want to import cluster positions from, enter it here. Otherwise, you can cluster the samples you've selected to determine...

Import cluster positions from a cluster file

Cluster File

**Project Settings**

**Options**

Pre-Calculate

Pre-Calculate should only be used for memory based projects.

This option will improve speed but requires 4.5x more memory.

**Project Creation Actions**

Cluster SNPs

Calculate Sample and SNP Statistics

Calculate Heritability

Gen Call Threshold:

**Optional Script File**

A file designating custom or pre-set cluster positions can be loaded here instead of the default auto-clustering

Cluster SNPs

-0.15 is standard  
-Defines area within which individuals will get a genotype call (outside will be 'no calls')

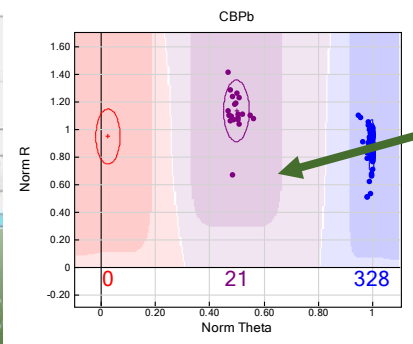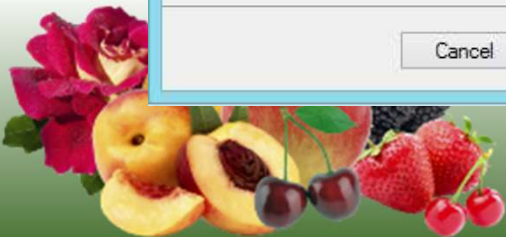

Ros  
DISEASE RE

TY

# Adding additional samples

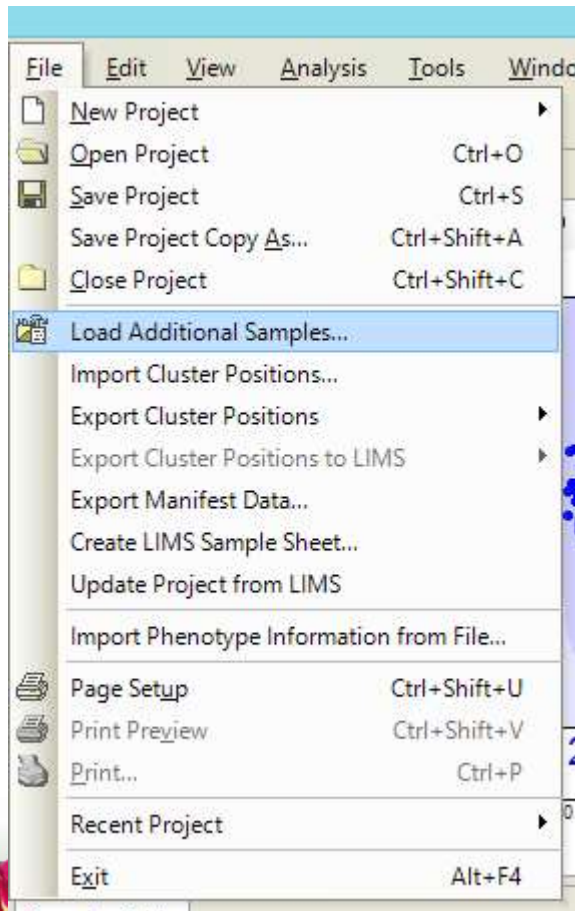

- File > Load Additional Samples...
  - Same process as before

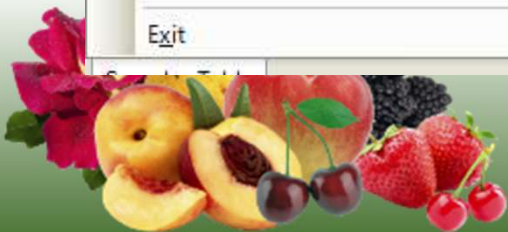

**RosBREED**  
DISEASE RESISTANCE × HORTICULTURAL QUALITY



United States  
Department of  
Agriculture

National Institute  
of Food and  
Agriculture

# First look at data

## RosBREED

DISEASE  
RESISTANCE



HORTICULTURAL  
QUALITY



SUPERIOR  
CULTIVARS





# GenomeStudio® Layout

The screenshot displays the GenomeStudio 2.0 interface for a genotyping project. The main window is titled "GenomeStudio 2.0 - Genotyping - 6+9Kv5" and includes a menu bar (File, Edit, View, Analysis, Tools, Window, Help) and a toolbar. The interface is divided into several panes:

- SNP Graph:** Located in the top-left pane, it shows a plot of Norm R (y-axis, 0 to 3) versus Norm Theta (x-axis, 0 to 1). A red vertical line is positioned at approximately 0.15 on the x-axis, with a red circle around it. The plot is labeled "SNP Graph" and has values "43" and "305" at the bottom.
- Full Data Table, SNP Table, and Paired Sample Table:** The central pane displays a large table with columns for Index, Name, Address, Chr, Position, GenTrain Score, Frac A, Frac C, Frac G, Frac T, GType, Score, Theta, R, and columns for Sample 17 (LargeDeepRed), Sample 36 (UkrGriotte), and Sample 38 (YelSpanish). The table is labeled "Full Data Table, SNP Table, and Paired Sample Table".
- Samples Table:** Located in the bottom-left pane, it shows a table with columns for Sample, Original, Name, Short, Alternative Name, Germplasm Order, PoorDNA, Source, and 6K\_haps available on 6+. The table is labeled "Samples Table".
- Error Table:** Located in the bottom-right pane, it shows a table with columns for Error Index and Parent1/. The table is labeled "Error Table".

At the bottom of the interface, there is a status bar with the text "Log" and a toolbar with icons for Select All, Copy, Save, Clear, X, Errors, Warnings, Info, and Log.

# SNP Graph

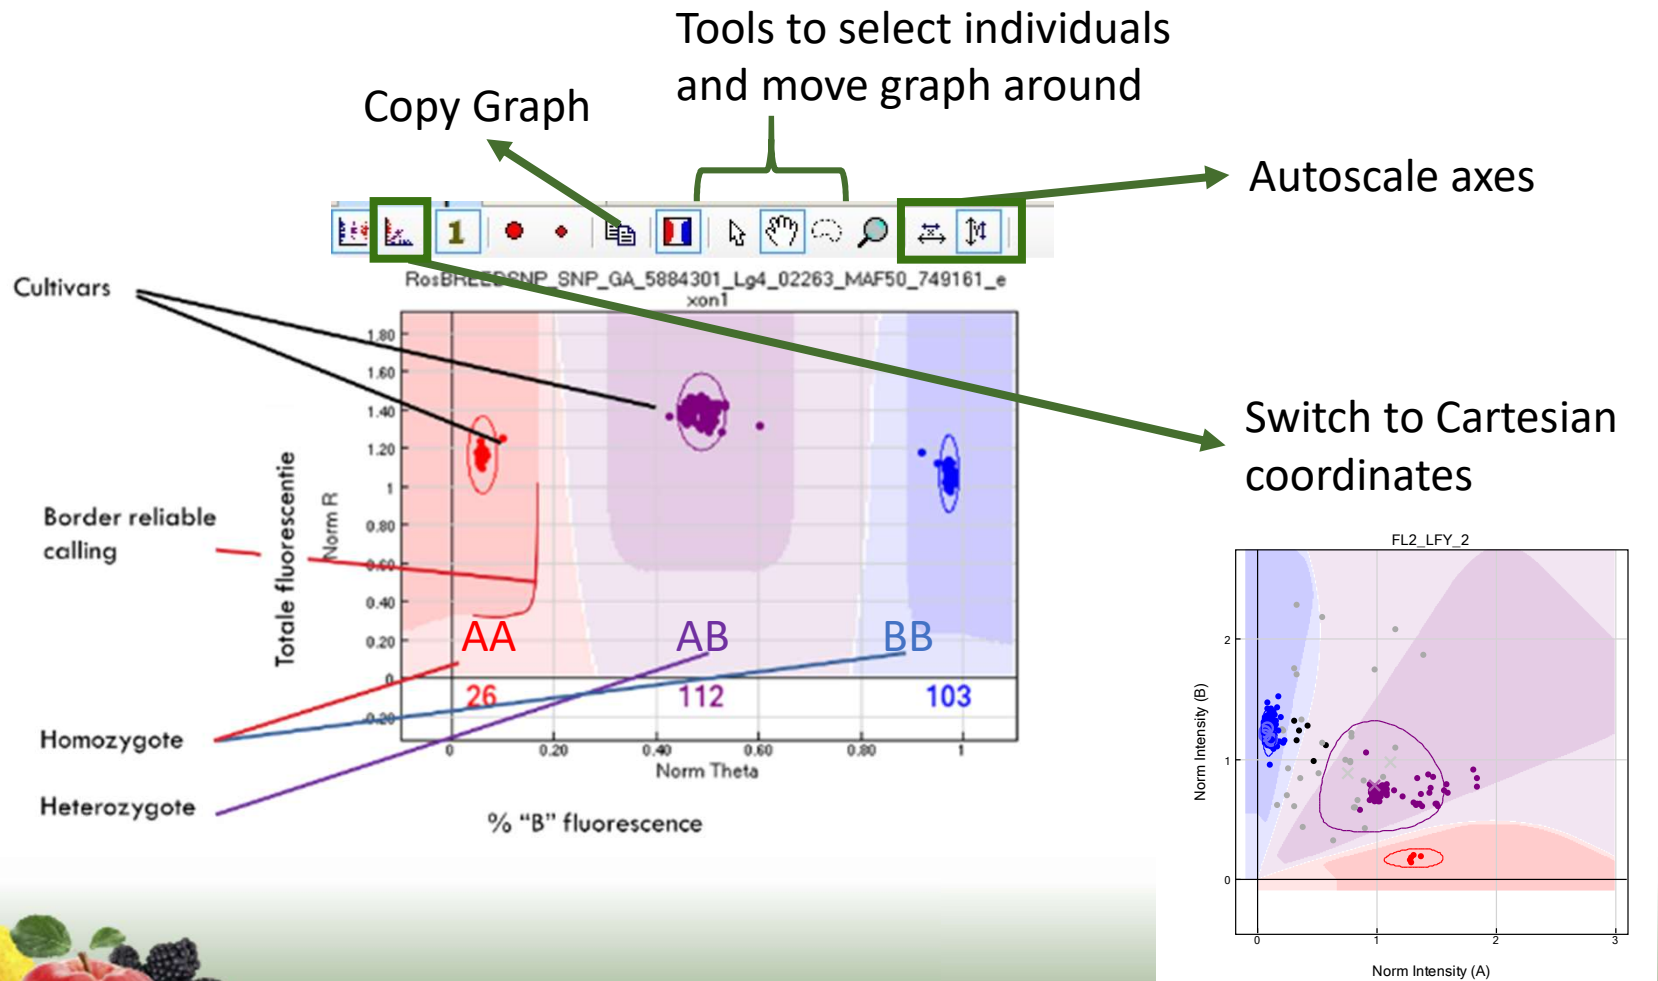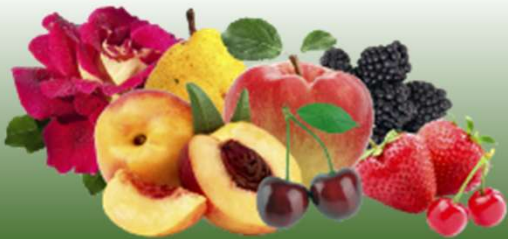

**RosBREED**  
DISEASE RESISTANCE × HORTICULTURAL QUALITY

# Full data table

Import (additional columns)      Column Chooser

Copy    Export    Plotting functions    filter/unfilter    sample columns

| Index | Name  | Address | Chr   | Position | GenTrain Score | Frac A | Frac C | Frac G | Frac T | Sample 1<br>9/47 |        |        |        | Sample 2<br>5/62 |        |        |        |    |
|-------|-------|---------|-------|----------|----------------|--------|--------|--------|--------|------------------|--------|--------|--------|------------------|--------|--------|--------|----|
|       |       |         |       |          |                |        |        |        |        | GType            | Score  | Theta  | R      | GType            | Score  | Theta  | R      |    |
| 1     | CBP   | 7074... | PA... | 14629699 | 0.8098         | 0.235  | 0.265  | 0.255  | 0.245  | AB               | 0.8304 | 0.5927 | 0.8864 | BB               | 0.8304 | 0.9867 | 0.7032 | BB |
| 2     | CBP_2 | 5871... | PA... | 14629699 | 0.7834         | 0.235  | 0.265  | 0.255  | 0.245  | AB               | 0.7893 | 0.5749 | 0.8928 | BB               | 0.7893 | 0.9851 | 0.7371 | BB |
| 3     | CBPb  | 2569... | PA... | 37474346 | 0.9265         | 0.235  | 0.225  | 0.206  | 0.333  | BB               | 0.9175 | 1.0000 | 0.8438 | BB               | 0.9175 | 0.9988 | 0.8398 | BB |
| 4     | CBPc  | 2877... | PA... | 3108977  | 0.7207         | 0.176  | 0.206  | 0.235  | 0.382  | NC               | 0.0678 | 0.3507 | 1.5965 | AB               | 0.6285 | 0.4337 | 1.5368 | BB |

SNPs

Quality score

Genotype Call

Position in SNP Graph

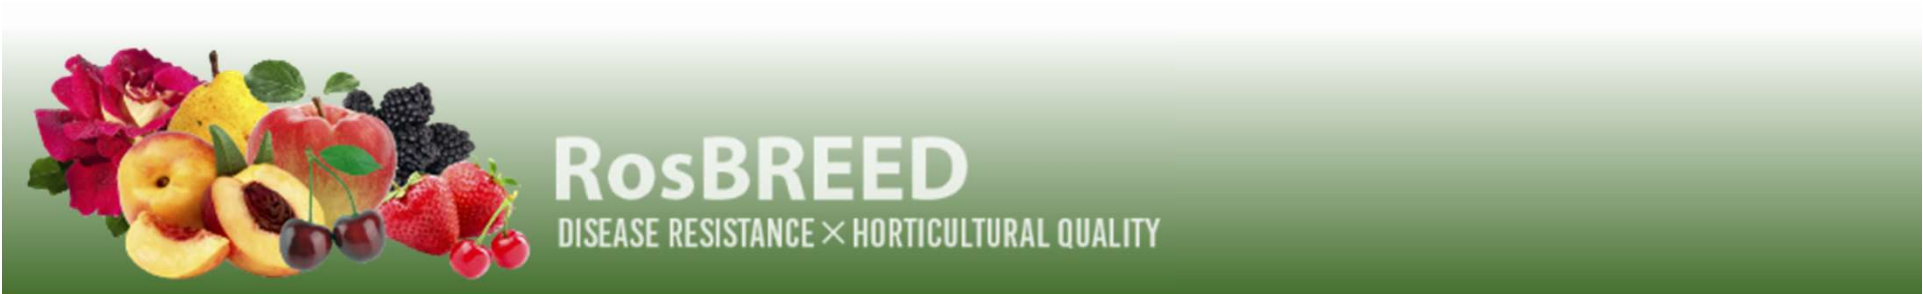

# SNP data table

| Index | Name  | Chr   | Position | ChiTest1<br>00 | Het<br>Excess | AA Freq | AB Freq | BB Freq | Call Freq | Minor<br>Freq | Aux | P-C<br>Errors | P-P-C<br>Errors | Rep<br>Errors | 10% GC | 50% GC | SNP   | # Calls | # no<br>calls | Plus/Min<br>us<br>Strand | Custom Cluster<br># | Adi |
|-------|-------|-------|----------|----------------|---------------|---------|---------|---------|-----------|---------------|-----|---------------|-----------------|---------------|--------|--------|-------|---------|---------------|--------------------------|---------------------|-----|
| 1     | CBP   | PA... | 14629699 | 0.8328         | 0.0211        | 0.0029  | 0.1232  | 0.8739  | 1.0000    | 0.0645        | 0   | 0             | 1               | 0             | 0.8304 | 0.8304 | [T/C] | 349     | 0             |                          | 3                   | 70  |
| 2     | CBP_2 | PA... | 14629699 | 0.8328         | 0.0211        | 0.0029  | 0.1232  | 0.8739  | 1.0000    | 0.0645        | 0   | 0             | 1               | 0             | 0.7893 | 0.7893 | [T/C] | 349     | 0             |                          | 3                   | 58  |

How well did the SNP perform?

Are parents and offspring matching?  
(see later)

Was the SNP polymorphic?

| SNP   | # Calls | # no<br>calls | Plus/Min<br>us<br>Strand | Custom Cluster<br># | Address | GenTrain<br>Score | Orig<br>Score | Edited | Cluster<br>Sep | AA T<br>Mean | AA T<br>Dev | AB T<br>Mean | AB T<br>Dev | BB T<br>Mean | BB T<br>Dev | AA R<br>Mean | AA R<br>Dev | AB R<br>Mean | AB R<br>Dev | BB R<br>Mean | BB R<br>Dev | Address2 | Norm ID |
|-------|---------|---------------|--------------------------|---------------------|---------|-------------------|---------------|--------|----------------|--------------|-------------|--------------|-------------|--------------|-------------|--------------|-------------|--------------|-------------|--------------|-------------|----------|---------|
| [T/C] | 349     | 0             |                          | 3                   | 7074231 | 0.8098            | 0.8098        | 0      | 0.9001         | 0.0706       | 0.0224      | 0.5832       | 0.0346      | 0.9914       | 0.0074      | 0.4874       | 0.1000      | 0.9331       | 0.1088      | 0.7781       | 0.1000      | 0        | 2       |
| [T/C] | 349     | 0             |                          | 3                   | 5871731 | 0.7834            | 0.7834        | 0      | 0.9221         | 0.0760       | 0.0224      | 0.5850       | 0.0328      | 0.9888       | 0.0075      | 0.4652       | 0.1000      | 0.9608       | 0.1093      | 0.7820       | 0.1000      | 0        | 2       |

“Array specific” data

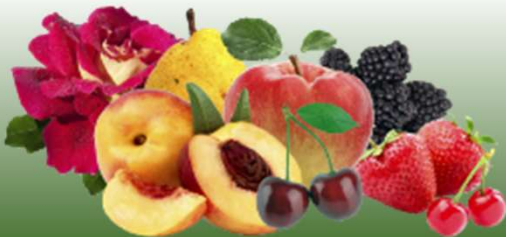

**RosBREED**  
DISEASE RESISTANCE × HORTICULTURAL QUALITY



# Sample Table

- All columns of sample sheet
- Sample statistics (need to be calculated)
- Linked with SNP graph
  - Selecting in table will highlight in SNP graph vice versa

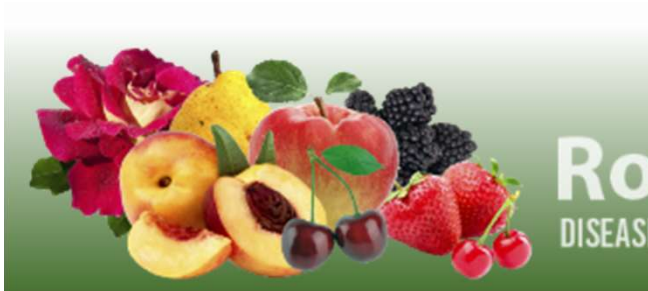

| Sample ID  | Alternative Name | Source | Index | Call Rate | Gender  |
|------------|------------------|--------|-------|-----------|---------|
| 9/47       |                  | Cherry | 1     | 0.000000  | Unknown |
| 5/62       |                  | Cherry | 2     | 0.000000  | Unknown |
| 11/118     |                  | Cherry | 3     | 0.000000  | Unknown |
| 13/20      |                  | Cherry | 4     | 0.000000  | Unknown |
| 6/240      |                  | Cherry | 5     | 0.000000  | Unknown |
| 7146-16    |                  | Cherry | 6     | 0.000000  | Unknown |
| 7147-1     |                  | Cherry | 7     | 0.000000  | Unknown |
| 7147-9     |                  | Cherry | 8     | 0.000000  | Unknown |
| 8008-10    |                  | Cherry | 9     | 0.000000  | Unknown |
| 8008-5     |                  | Cherry | 10    | 0.000000  | Unknown |
| 8011-2     |                  | Cherry | 11    | 0.000000  | Unknown |
| 8011-3     |                  | Cherry | 12    | 0.000000  | Unknown |
| 8011-4     |                  | Cherry | 13    | 0.000000  | Unknown |
| 99F/132R4  |                  | Cherry | 14    | 0.000000  | Unknown |
| 99F/150R1A |                  | Cherry | 15    | 0.000000  | Unknown |

Rows=349 Disp=349 Sel=1 Filter=Filter is not active.

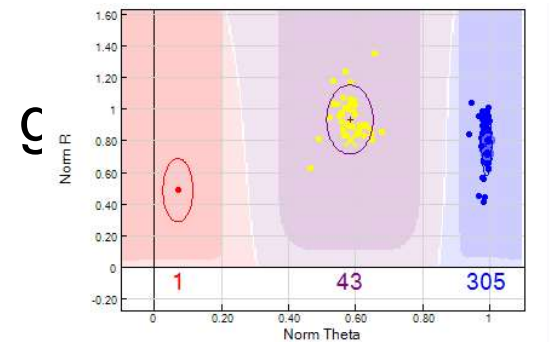

| Sample ID       | Alternative Name | Source | Index | Call Rate | Gender  |
|-----------------|------------------|--------|-------|-----------|---------|
| Black Star      |                  | Cherry | 27    | 0.8604617 | Unknown |
| Black Tartarian |                  | Cherry | 28    | 0.8354598 | Unknown |
| Black Gold      |                  | Cherry | 29    | 0.8488089 | Unknown |
| Black Republic  |                  | Cherry | 30    | 0.8634118 | Unknown |
| Burbank         |                  | Cherry | 31    | 0.7537429 | Unknown |
| Burbank Black   |                  | Cherry | 32    | 0.8634118 | Unknown |
| Cashmere        |                  | Cherry | 33    | 0.8641493 | Unknown |
| Cavalier        |                  | Cherry | 34    | 0.8311822 | Unknown |
| Celeste         |                  | Cherry | 35    | 0.8623055 | Unknown |
| Chelan          |                  | Cherry | 36    | 0.8644443 | Unknown |
| Coe             |                  | Cherry | 37    | 0.7829486 | Unknown |
| Compact Stella  |                  | Cherry | 38    | 0.8640018 | Unknown |
| Coops Special   |                  | Cherry | 39    | 0.8204145 | Unknown |
| Corum           |                  | Cherry | 40    | 0.8623793 | Unknown |
| Cowiche         | DF70             | Cherry | 41    | 0.8626697 | Unknown |



# Error Table

- Shows errors between replicates and parent(s) and offspring
  - Will be discussed further
  - Linked to SNP graph
    - Replicates: square
    - Parent(s) and offspring: circle(s) and cross, respectively

| Error Index | Error Type | Child/Rep Index | Child/Rep | Child/Rep GType | Parent1/Rep Index | Parent1/Rep    | Parent1/Rep GType | Parent2 Index | Parent2 | Parent2 GType | SNP Index | SNP Name |
|-------------|------------|-----------------|-----------|-----------------|-------------------|----------------|-------------------|---------------|---------|---------------|-----------|----------|
| 1           | P-C        | 110             | FR008T049 | AA              | 234               | Krupnoplodnaya | BB                |               |         |               | 8         | COL2     |
| 2           | P-P-C      | 118             | FR012T061 | AA              | 238               | Lapins         | AB                | 341           | Venus   | BB            | 8         | COL2     |
| 3           | P-P-C      | 221             | Gil-Peck  | AB              | 256               | Napoleon       | BB                | 220           | Giant   | BB            | 8         | COL2     |

| Error Index | Error Type | Child/Rep Index | Child/Rep | Child/Rep GType | Parent1/Rep Index | Parent1/Rep    | Parent1/Rep GType | Parent2 Index | Parent2 | Parent2 GType | SNP Index | SNP Name |
|-------------|------------|-----------------|-----------|-----------------|-------------------|----------------|-------------------|---------------|---------|---------------|-----------|----------|
| 1           | P-C        | 110             | FR008T049 | AA              | 234               | Krupnoplodnaya | BB                |               |         |               | 8         | COL2     |
| 2           | P-P-C      | 118             | FR012T061 | AA              | 238               | Lapins         | AB                | 341           | Venus   | BB            | 8         | COL2     |
| 3           | P-P-C      | 221             | Gil-Peck  | AB              | 256               | Napoleon       | BB                | 220           | Giant   | BB            | 8         | COL2     |

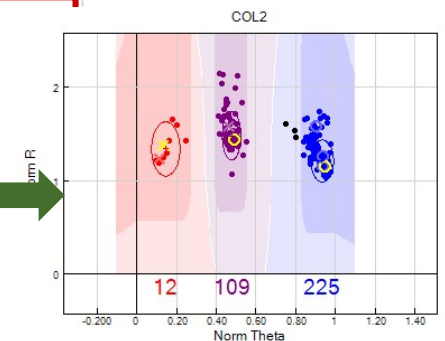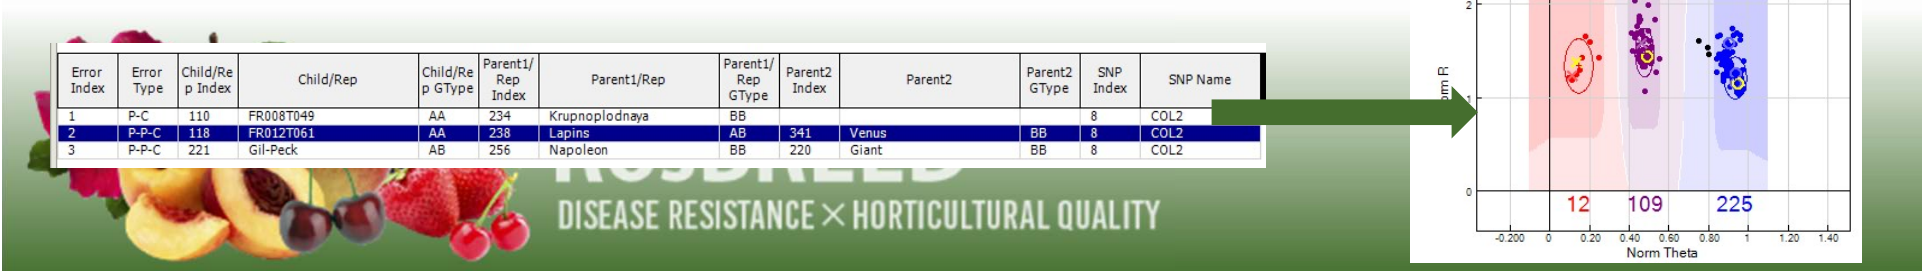



United States  
Department of  
Agriculture

National Institute  
of Food and  
Agriculture

# Sample quality and ploidy

## RosBREED

DISEASE  
RESISTANCE



HORTICULTURAL  
QUALITY



SUPERIOR  
CULTIVARS



# Checking Sample Quality

- Visual inspection of SNP graphs

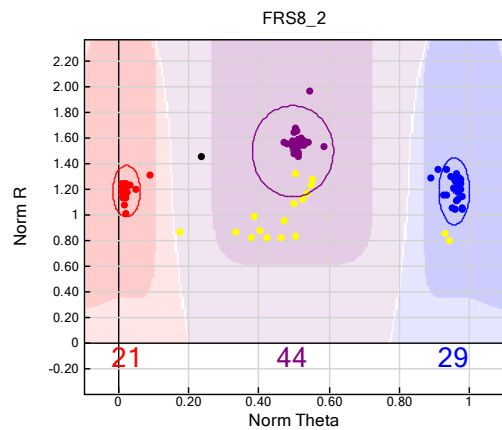

Some individuals are regularly located outside main clusters

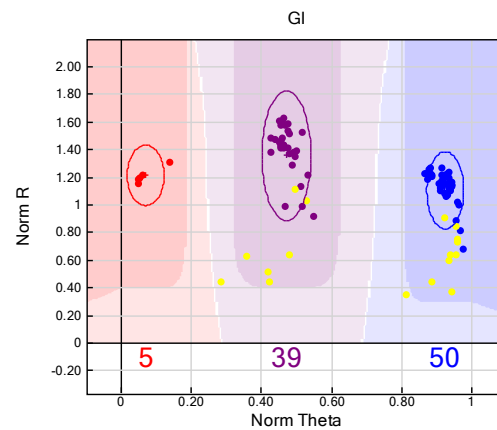

More individuals outside main clusters  
\*use 'ctrl' + left mouse clicks to add new individual to selection

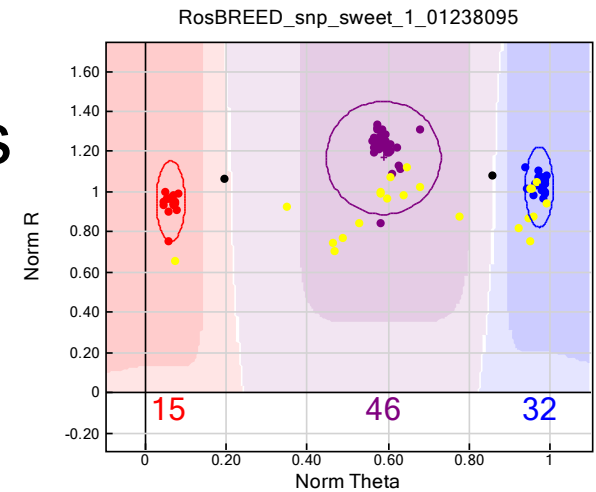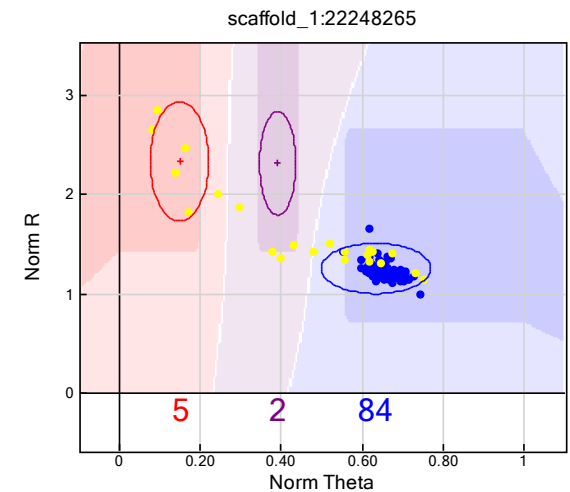

**RosBREED**  
DISEASE RESISTANCE × HORTICULTURAL QUALITY

# Checking Sample Quality

## 1. Histogram function of Full Data Table

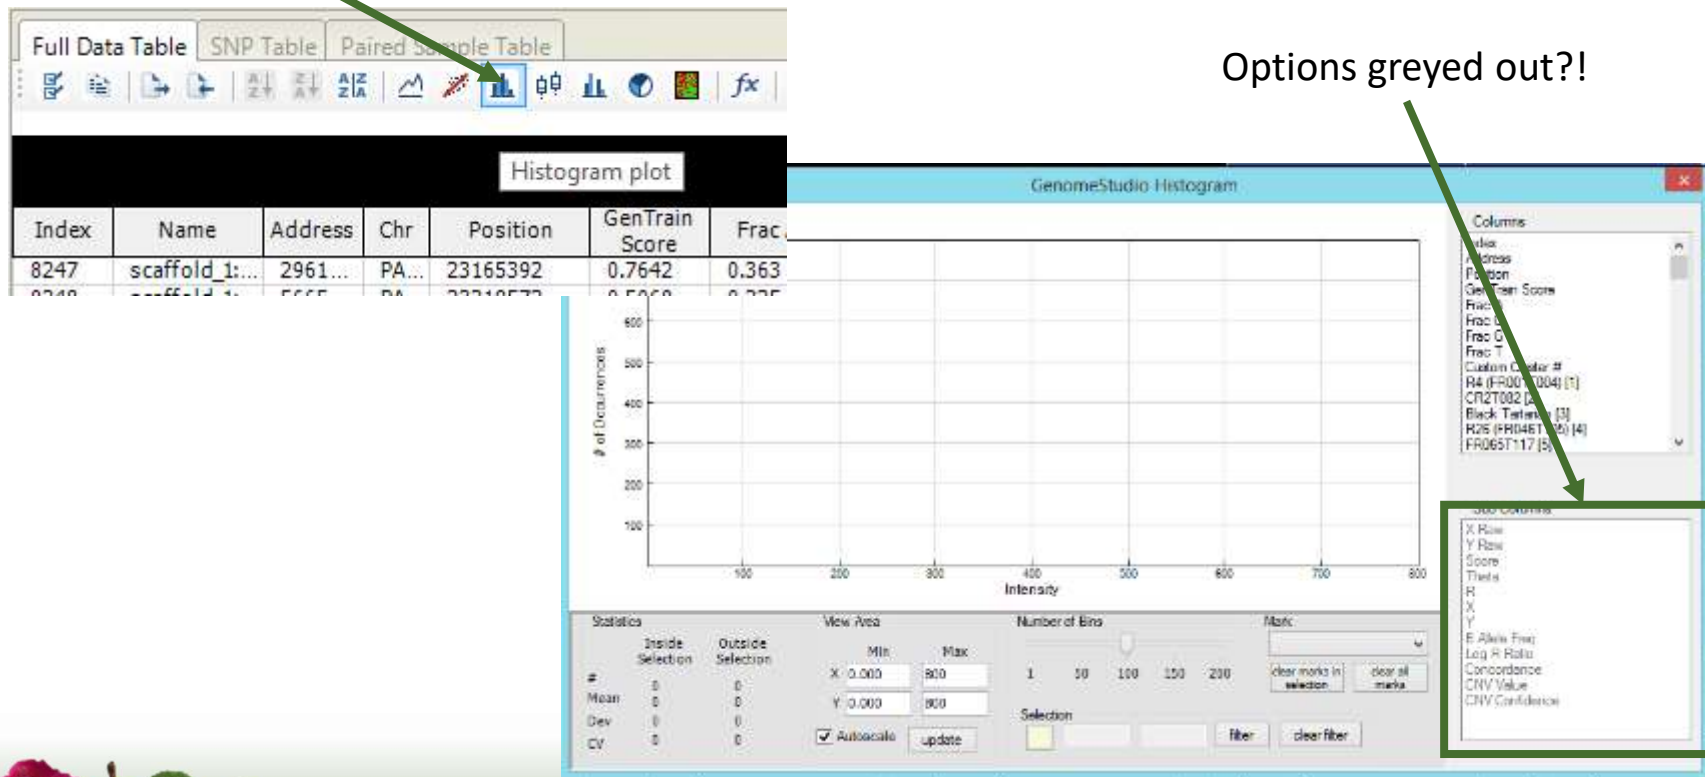

**RosBREED**  
DISEASE RESISTANCE × HORTICULTURAL QUALITY

# Checking Sample Quality

2. Select first individual

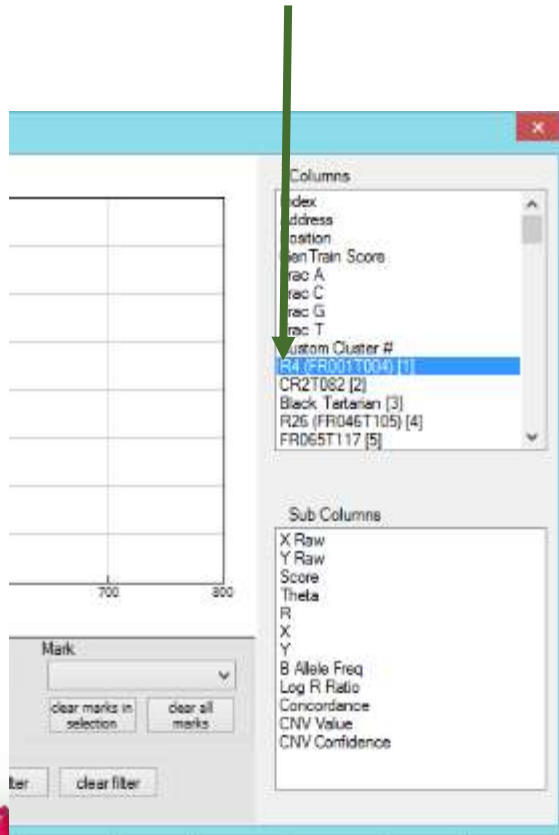

3. Choose "B Allele Freq"

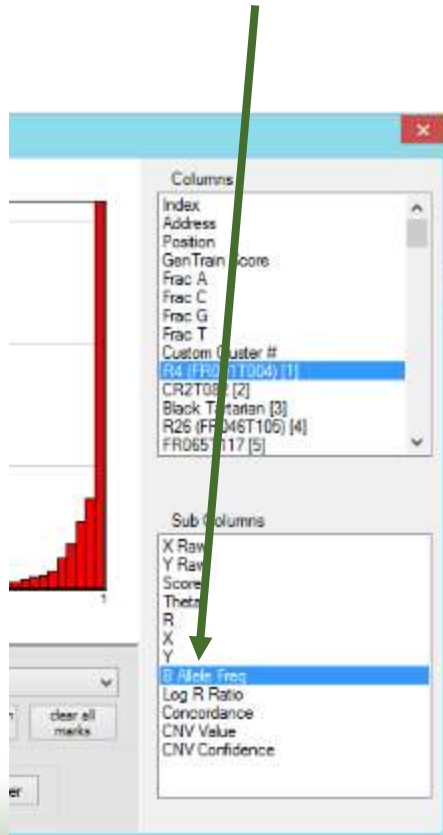

4. Select individual again

\*Allows for scrolling through ind.

\*Use 'up' and 'down' keys to scroll through ind.

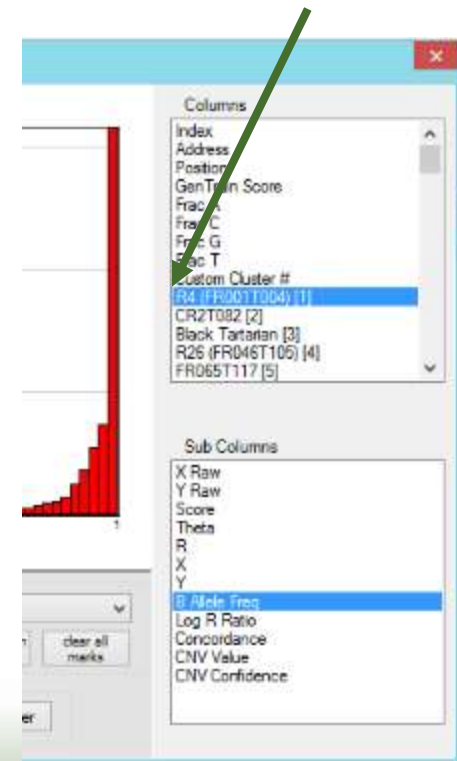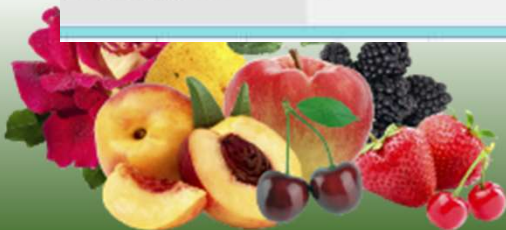

**RosBREED**  
DISEASE RESISTANCE × HORTICULTURAL QUALITY



# Checking Sample Quality

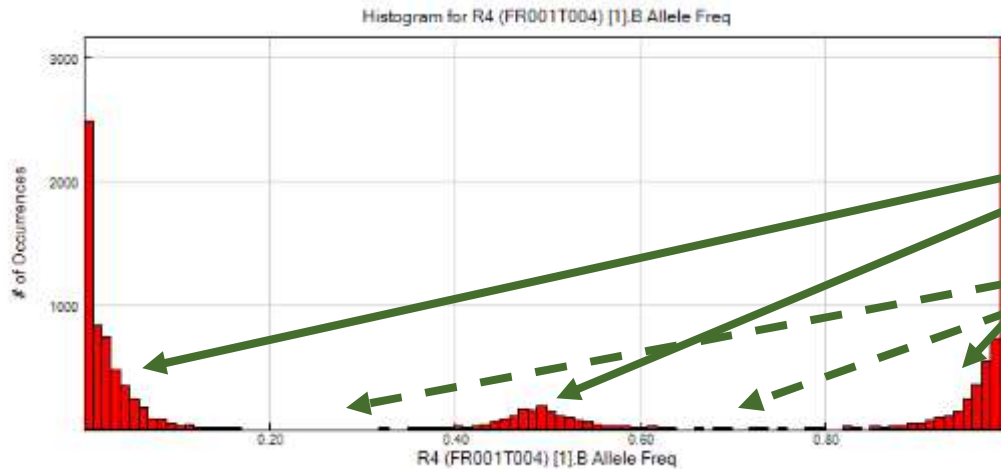

## Sample with good quality

-Three (clear) peaks

-Barely any occurrences between three peaks

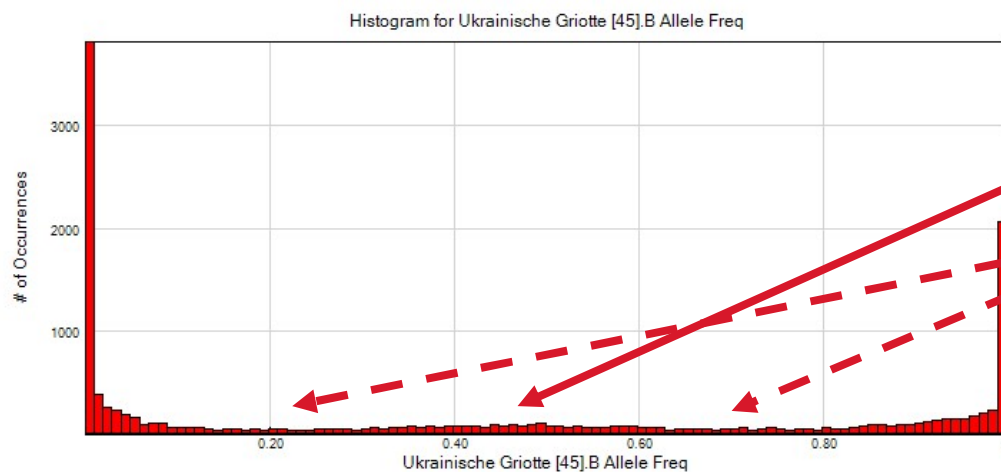

## Sample with poor quality

-No clear heterozygous peak

-Many occurrences between three peaks  
(middle section looks ~ flat)

# Checking Sample Ploidy

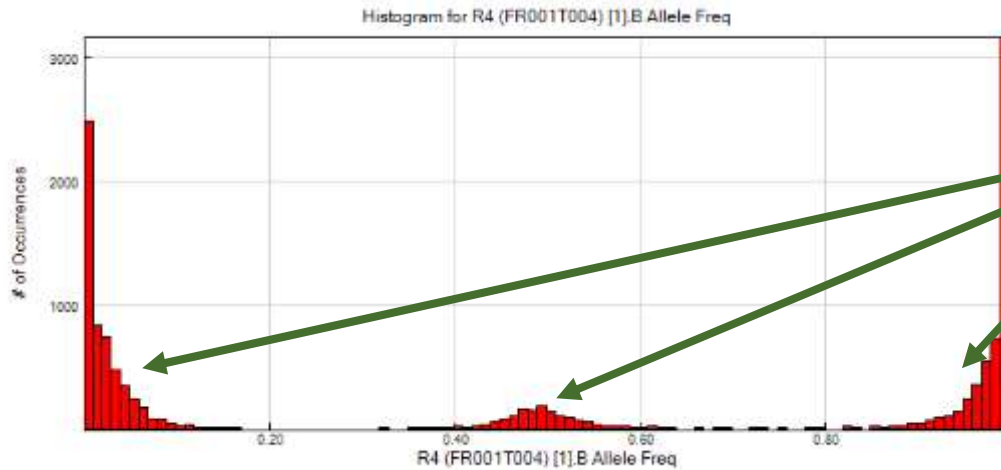

## Diploid sample

- Three (clear) peaks
- AA, AB, and BB

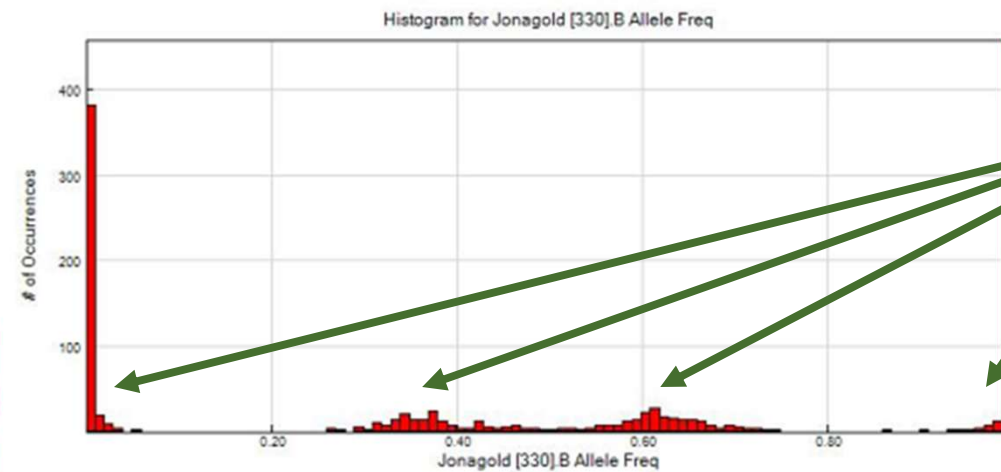

## Triploid sample

- Four peaks
- AAA, AAB, ABB, and BBB

# Checking Sample Ploidy

- Other ploidy

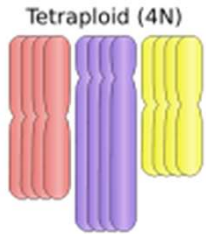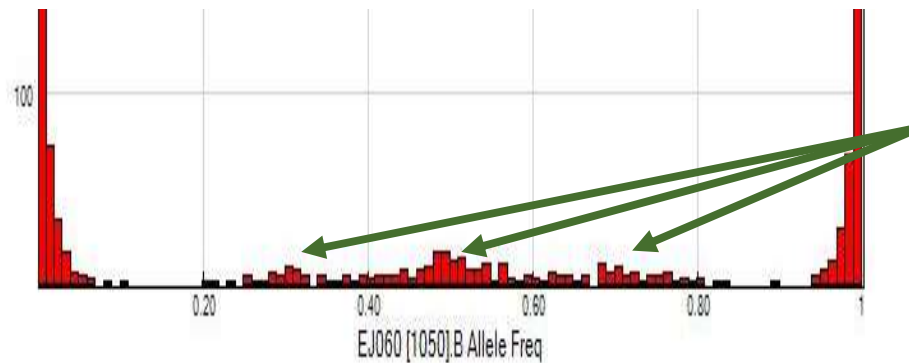

## Tetraploid sample

- Five peaks?
- Different from poor quality?
- Could be a mix of 2 samples

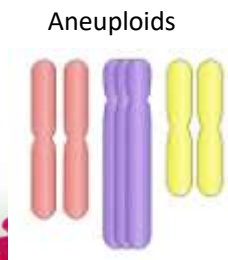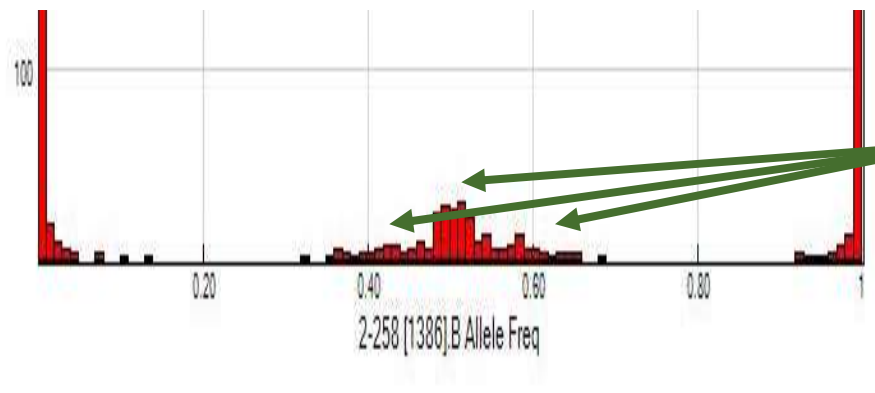

## Aneuploid sample

- 3 peaks + 2 small peaks?
- Not easy to see

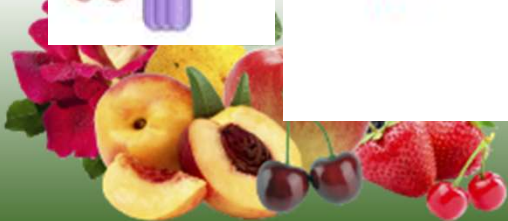

# Chagné et al. (2015) method

1. Choose 'Filter rows' for SNP Table in GenomeStudio®

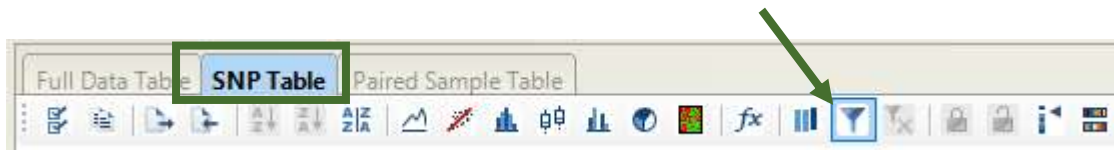

2. Apply the following filter parameters (continued on next slide):

|            |                              |                                                                 |
|------------|------------------------------|-----------------------------------------------------------------|
| Call Freq  | $\geq 0.90$                  | Only SNP that have good call rate                               |
| Minor Freq | $>0.01$                      | Only polymorphic SNPs                                           |
| 50% GC     | $\geq 0.40$                  | Only SNPs for which most individuals were close to main cluster |
| GenTrain   | $\geq 0.65$                  | Only SNPs with good overall clustering                          |
| ClusterSep | $\geq 0.40$                  | Only SNPs with well separated clusters                          |
| AA T Mean  | $\leq 0.125$                 | Only SNPs with AA cluster in expected position                  |
| AA T Dev   | $\leq 0.028$                 | Only SNPs with 'narrow' AA cluster (no multiple clusters)       |
| AB T Mean  | $\geq 0.375$<br>$\leq 0.625$ | Only SNPs with AB cluster in expected position                  |
| AB T Dev   | $\leq 0.056$                 | Only SNPs with 'narrow' AB cluster (no multiple clusters)       |
| BB T Mean  | $\geq 0.875$                 | Only SNPs with BB cluster in expected position                  |
| BB T Dev   | $\leq 0.028$                 | Only SNPs with 'narrow' BB cluster (no multiple clusters)       |

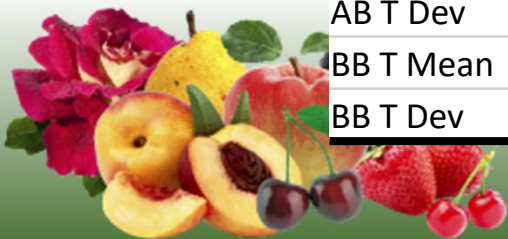

DISEASE RESISTANCE  $\times$  HORTICULTURAL QUALITY

# Chagné et al. (2015) method

2. Apply the following filter parameters (continued):

2b. Choose operation

2c. Choose value

2d. Add to filter criteria

2e. Add remaining criteria  
“AND” clause is added automatically

2f. Click ‘OK’ when all criteria are added

2a. Choose parameter

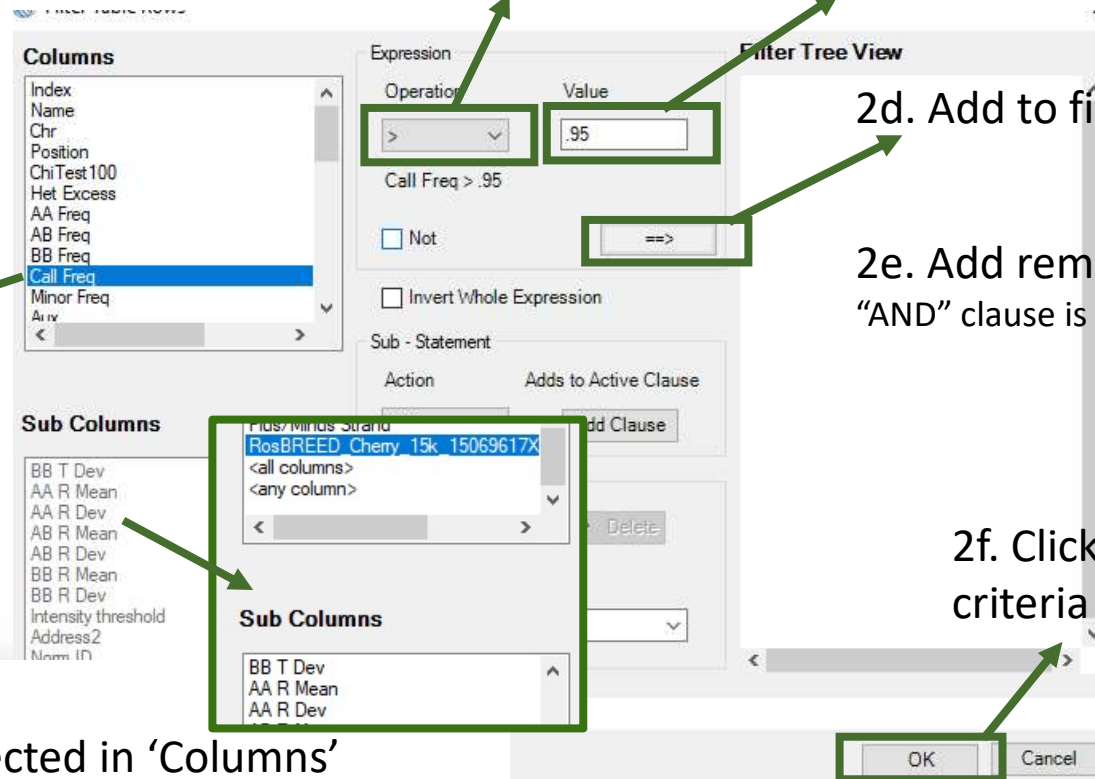

## Note:

Manifest must be selected in ‘Columns’ section before subcolumns become available

# Chagné et al. (2015) method

3. Go to Full Data Table and select 'Column Chooser'  
 \*Filtering of SNP Table remains for Full Data Table

4. Hide any column except Index, Chr, Position, and sample columns

| Index | Name   | Address | Chr   | Position | GenTrain Score | Frac A | Frac C | Frac G | Frac T | GType | Score  | Theta  |
|-------|--------|---------|-------|----------|----------------|--------|--------|--------|--------|-------|--------|--------|
| 1     | CBP    | 7074... | PA... | 14629699 | 0.7572         | 0.235  | 0.265  | 0.255  | 0.245  | NC    | 0.0298 | 0.8421 |
| 2     | CBP_2  | 5871... | PA... | 14629699 | 0.7186         | 0.235  | 0.265  | 0.255  | 0.245  | AB    | 0.2146 | 0.7951 |
| 3     | CBPb   | 2569... | PA... | 37474346 | 0.8755         | 0.235  | 0.225  | 0.206  | 0.333  | BB    | 0.7744 | 0.9701 |
| 4     | CBPc   | 2877... | PA... | 3108977  | 0.6339         | 0.176  | 0.206  | 0.235  | 0.382  | NC    | 0.0751 | 0.0881 |
| 5     | CBPc_2 | 4875... | PA... | 3108977  | 0.6340         | 0.176  | 0.206  | 0.235  | 0.382  | NC    | 0.1161 | 0.0411 |
| 6     | CLF    | 2680... | PA... | 15025492 | 0.6902         | 0.314  | 0.206  | 0.225  | 0.255  | NC    | 0.0071 | 0.7641 |
| 7     | CLF_2  | 6478... | PA... | 15025492 | 0.6882         | 0.314  | 0.206  | 0.225  | 0.255  | NC    | 0.0192 | 0.7951 |

6. Show B Allele Freq subcolumn

5. Hide standard subcolumns

7. Press 'OK'



# Chagné et al. (2015) method

8. Export table

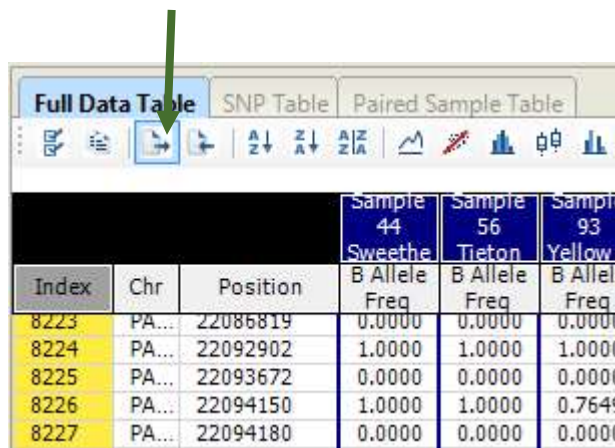

| Index | Chr   | Position | Sample 44<br>Sweethe<br>B Allele<br>Freq | Sample 56<br>Tieton<br>B Allele<br>Freq | Sample 93<br>Yellow<br>B Allele<br>Freq |
|-------|-------|----------|------------------------------------------|-----------------------------------------|-----------------------------------------|
| 8223  | PA... | 22086819 | 0.0000                                   | 0.0000                                  | 0.0000                                  |
| 8224  | PA... | 22092902 | 1.0000                                   | 1.0000                                  | 1.0000                                  |
| 8225  | PA... | 22093672 | 0.0000                                   | 0.0000                                  | 0.0000                                  |
| 8226  | PA... | 22094150 | 1.0000                                   | 1.0000                                  | 0.7649                                  |
| 8227  | PA... | 22094180 | 0.0000                                   | 0.0000                                  | 0.0000                                  |

9. Give a meaningful name, choose save location, and save as '.csv' file

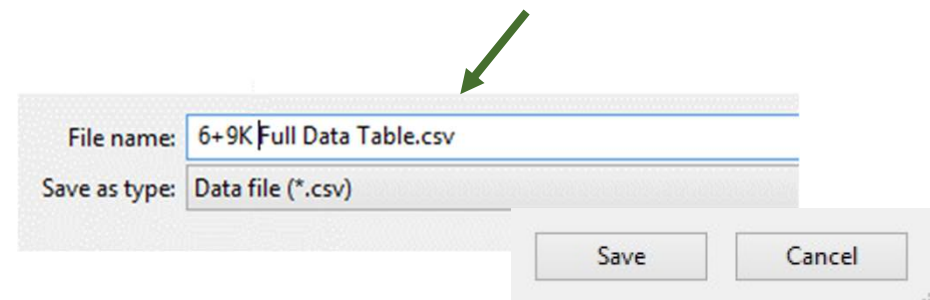

File name: 6+9K Full Data Table.csv

Save as type: Data file (\*.csv)

Save Cancel

10. If asked, choose 'Yes' to export entire table

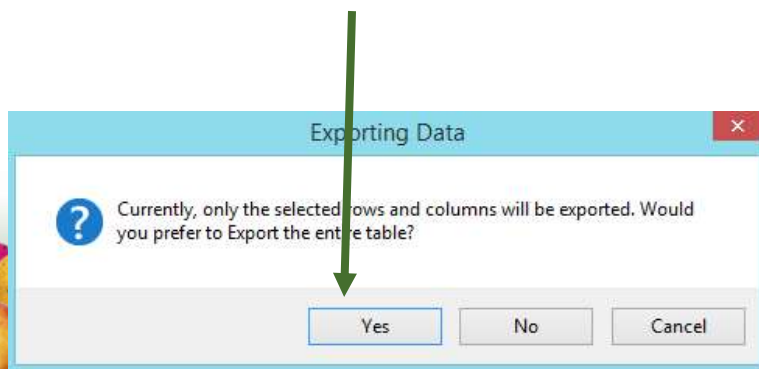

Exporting Data

Currently, only the selected rows and columns will be exported. Would you prefer to Export the entire table?

Yes No Cancel

11. Choose 'Yes' to view file in Excel

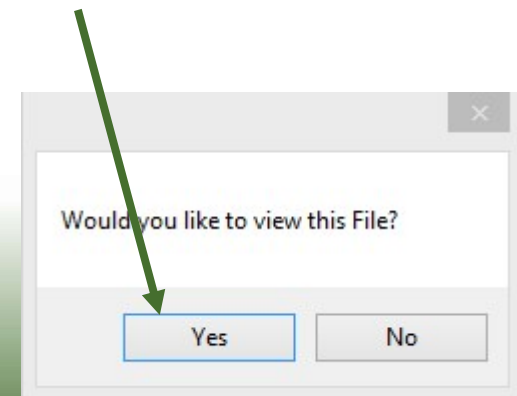

Would you like to view this File?

Yes No

# Chagné et al. (2015) method

12. Convert Chromosome numbers to numeric system where applicable

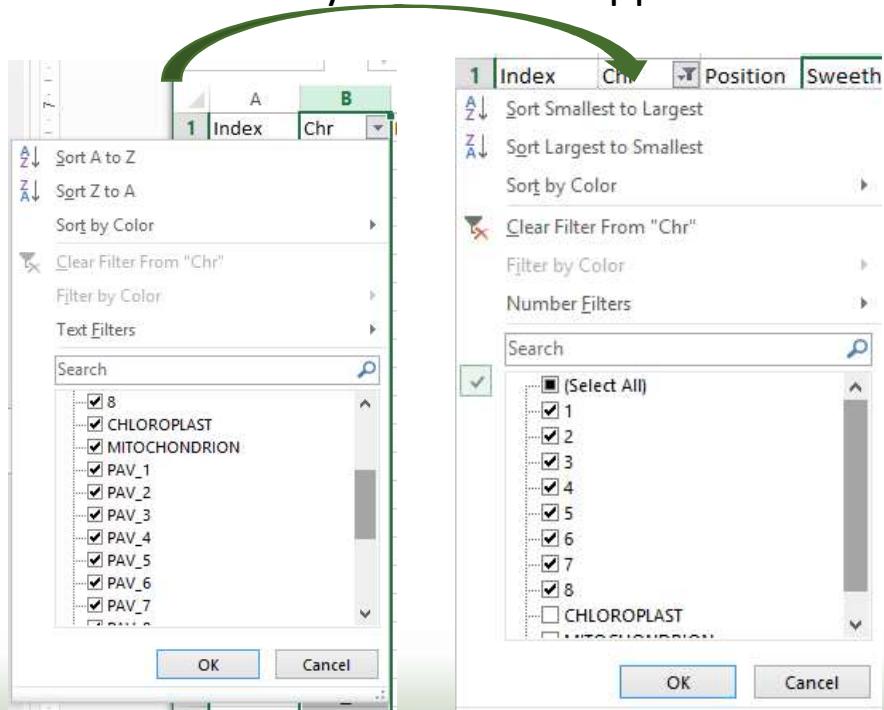

13. Insert a new column in front of sample columns

The image shows a portion of an Excel spreadsheet with columns C, D, E, and F. Column C is labeled 'Position' and column D is labeled 'Sweethe'. A context menu is open over column D, with the 'Insert' option highlighted in green.

|   | C        | D        | E                | F |
|---|----------|----------|------------------|---|
|   | Position | Sweethe  | Cut              |   |
| 8 | 14629699 | 0.820586 | Copy             |   |
| 8 | 14629699 | 0.751753 | Paste Options:   |   |
| 1 | 37474346 | 0.97149  |                  |   |
| 2 | 3108977  | 0.007736 |                  |   |
| 2 | 3108977  | 0        | Paste Special... |   |
| 7 | 15025492 | 0.826106 | Insert           |   |
| 7 | 15025492 | 0.855948 | Delete           |   |
| 3 | 1473284  | 0.373288 | Clear Contents   |   |
| 3 | 1473284  | 0.382824 |                  |   |

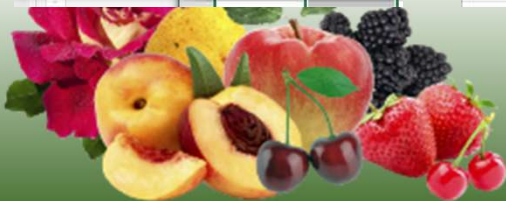

**RosBREED**  
DISEASE RESISTANCE × HORTICULTURAL QUALITY

# Chagné et al. (2015) method

14. Apply the following formula for the new column:

Cell value = 1,000,000,000 \* 'Chromosome number' + 'position on chromosome'

\*Choose a power of 10 that is larger than any position on chromosome

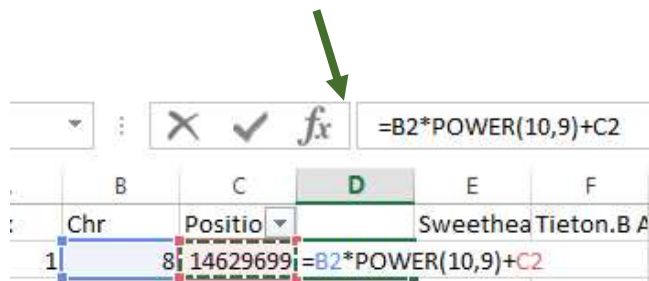

| C      | D          |    |
|--------|------------|----|
| sitio  |            | Sw |
| 629699 | 8014629699 | 0. |
| 629699 | 8014629699 | 0. |
| 474346 | 1037474346 | 1  |
| 108977 | 2003108977 | 0. |
| 108977 | 2003108977 |    |
| 025492 | 7015025492 | 0. |
| 025492 | 7015025492 | 0. |
| 473284 | 3001473284 | 0. |
| 473284 | 3001473284 | 0. |
| 052497 | 5010052497 |    |
| 946569 | 4012946569 | 0. |
| 755211 | 7018755211 | 0. |

15. Replace formula by fixed values

\*Copy column and paste as values

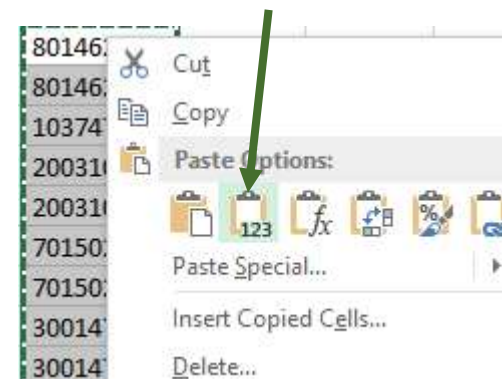

16. Delete original chromosome and position column

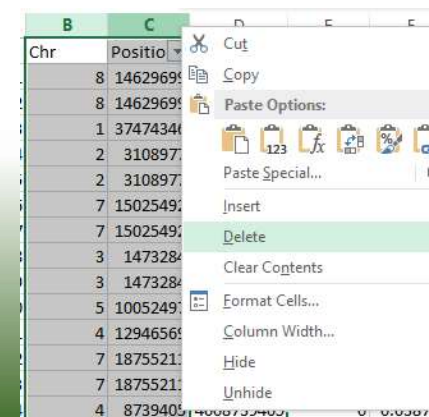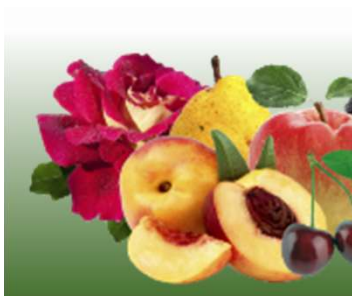

**RosBREED**  
DISEASE RESISTANCE × HORTICULTURAL QUALITY

# Chagné et al. (2015) method

File should look like this:

- 1<sup>st</sup> column: SNP Identifier (e.g. SNP Index)
- 2<sup>nd</sup> column: SNP position (including chromosome)
- 3<sup>rd</sup> column – end: B-allele Freq of each individual

|   | A     | B          | C        | D        | E           | F         |     |
|---|-------|------------|----------|----------|-------------|-----------|-----|
| 1 | Index | Position   | Sweethea | Tieton.B | A Yellow Sp | Rainier.B | Ukr |
| 2 | 1     | 8014629699 | 0.820586 | 0.658852 | 0.935553    | 0.926576  | 0.9 |
| 3 | 2     | 8014629699 | 0.751753 | 0.752404 | 0.970744    | 0.808932  | 0.9 |
| 4 | 3     | 1037474346 | 0.97149  | 0.817936 | 0.918174    | 0.964891  | 0.9 |
| 5 | 4     | 2003108977 | 0.007736 | 0.63033  | 1           | 0.637792  |     |
| 6 | 5     | 2003108977 | 0        | 0.699511 | 1           | 0.723935  |     |

17. Save as new 'csv' file:

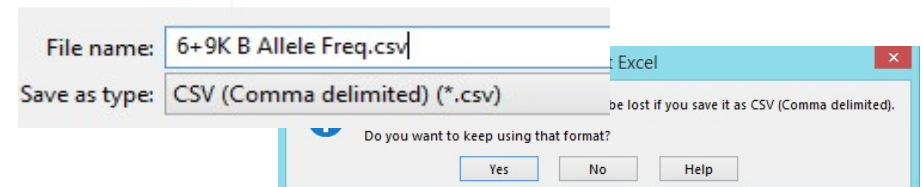

18. Copy R-script 'bAllele Analysis.R' (Suppl. Document 2) in same folder as newly created .csv file

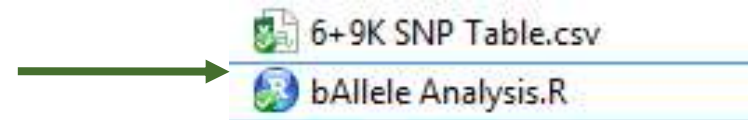

19. Open R-script 'bAllele Analysis.R' in RStudio



**RosBREED**  
DISEASE RESISTANCE × HORTICULTURAL QUALITY



# Chagné et al. (2015) method

20. Change file-name on line 1 into correct name of newly created .csv file

```
bAllele<- read.csv(file="SNP data_Triploids and deviations.csv", sep="," , stringsAsFactors=F)  
bAllele<- read.csv(file="6+9K B Allele Freq.csv", sep="," , stringsAsFactors=F)
```

21. Change name of pdf-output on line 2 into desired name

```
pdf("bAllele.pdf")  
pdf("bAllele 6+9K.pdf")
```

22. Change working directory into location that has .csv file and R script

\*Under 'Session', choose 'Set Working Directory', then choose 'To Source File Location'

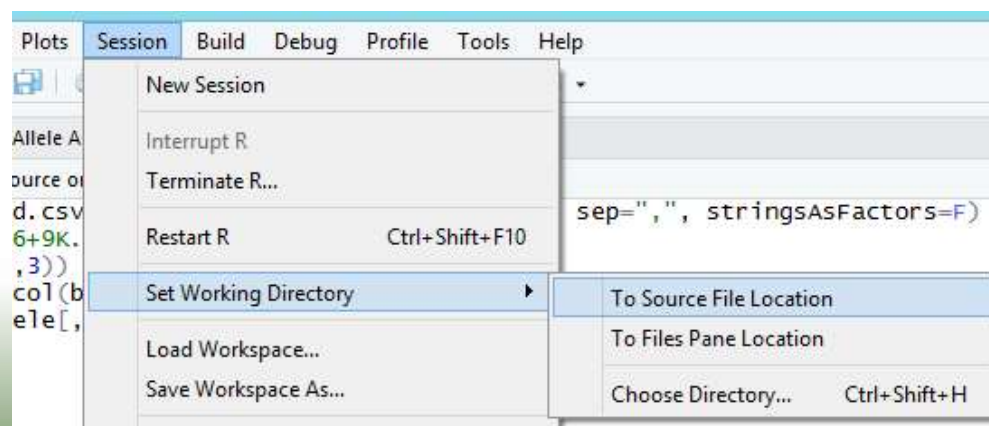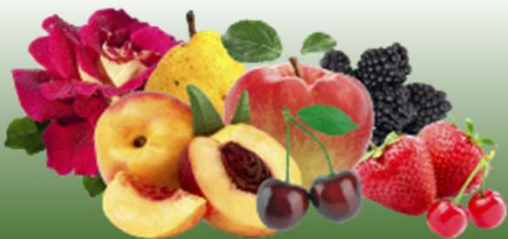

**ROSBREED**  
DISEASE RESISTANCE × HORTICULTURAL QUALITY



# Chagné et al. (2015) method

23. Run entire script

\*Select all lines and press run

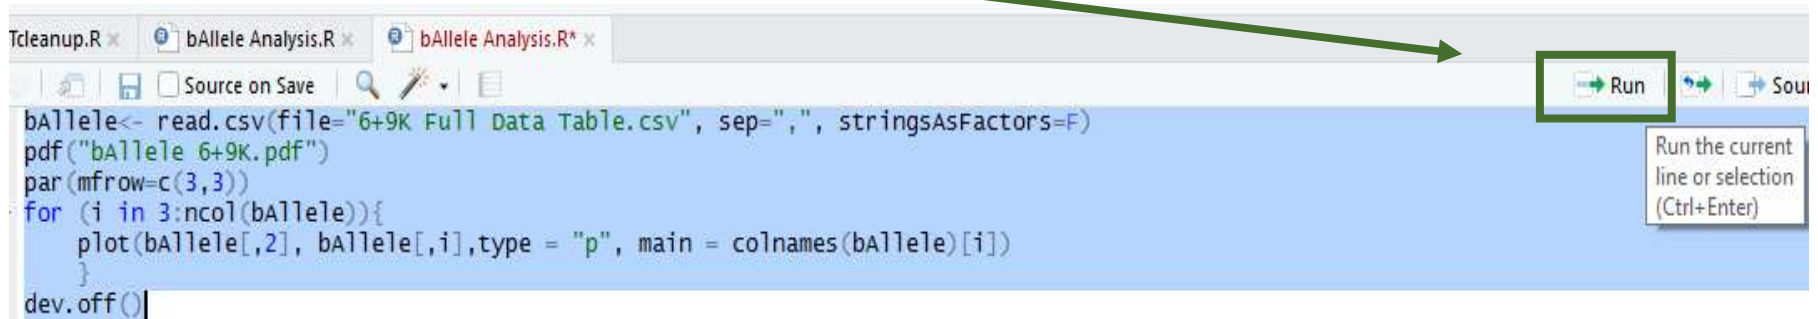

```
bAllele<- read.csv(file="6+9K Full Data Table.csv", sep=";", stringsAsFactors=F)
pdf("bAllele 6+9K.pdf")
par(mfrow=c(3,3))
for (i in 3:ncol(bAllele)){
  plot(bAllele[,2], bAllele[,i],type = "p", main = colnames(bAllele)[i])
}
dev.off()
```

24. Open created pdf file

\*It's in the same folder as the R-script and the .csv file with the B Allele Frequencies

Poor quality  
Monark.B\_Allele\_Freq

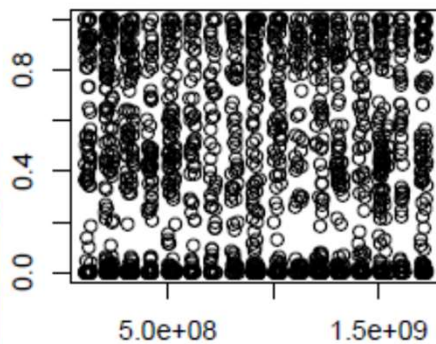

Tetraploid?

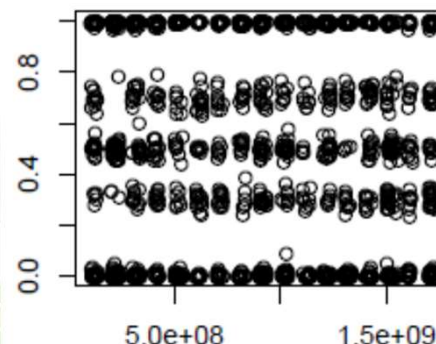

Aneuploid  
X2.258.B\_Allele\_Freq

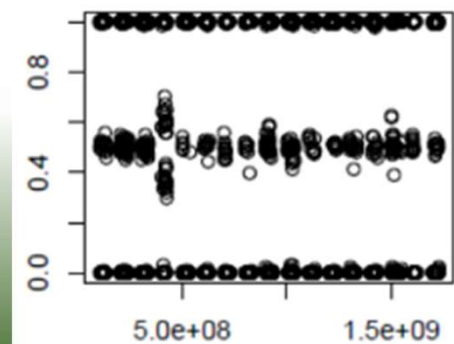

# Chagné et al. (2015) method

## Without initial filtering in SNP Table

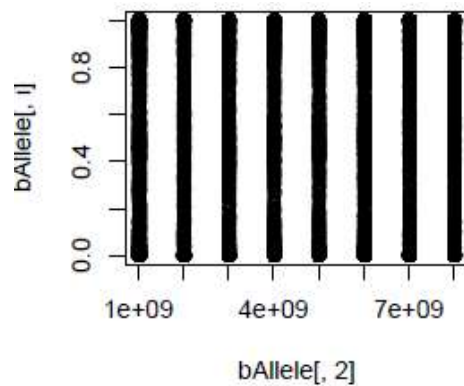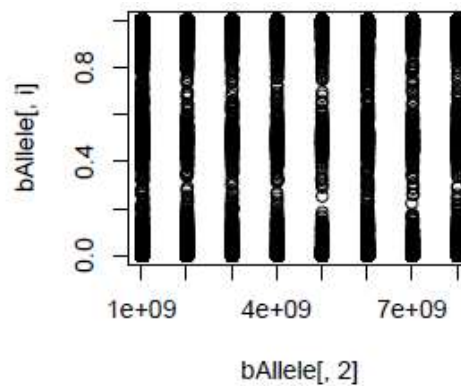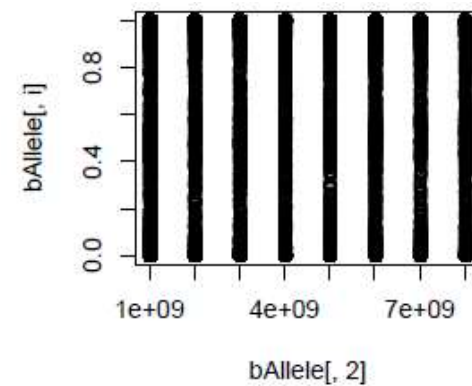

## With initial filtering in SNP Table

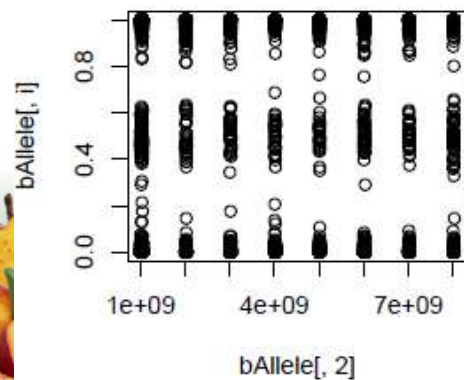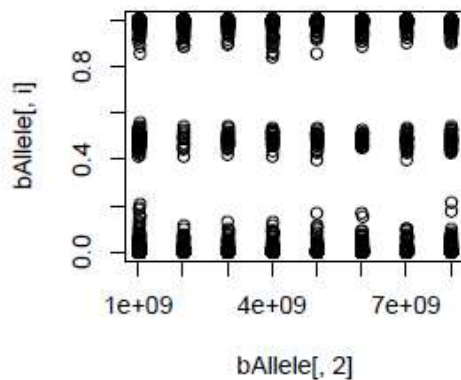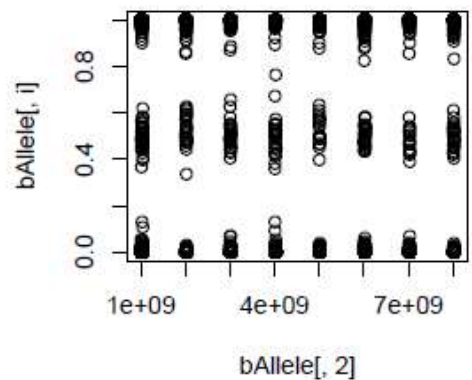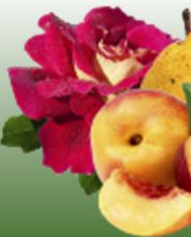

# Segmental aneuploids

- Lack a large segment of a chromosome
  - Large extra segment?
- Cannot be identified with methods described above
- Will lead to many errors further on for one chromosomal segment



**RosBREED**

DISEASE RESISTANCE × HORTICULTURAL QUALITY



United States  
Department of  
Agriculture

National Institute  
of Food and  
Agriculture

# SNP subset

## RosBREED

DISEASE  
RESISTANCE



HORTICULTURAL  
QUALITY



SUPERIOR  
CULTIVARS



# Creating input files ASSIsT

- Manual can be found under ‘...\\ASSIsT\_Win\_v1.01\\docs’

## Creating 1st input file (Final report)

### 1. Open Report Wizard in GenomeStudio

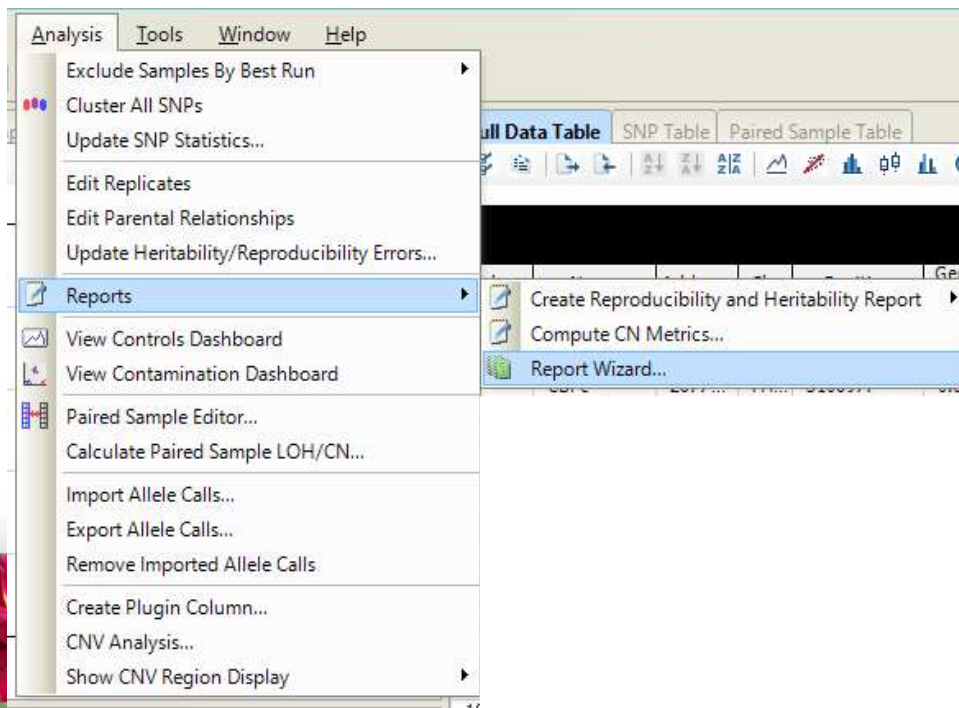

### 2. Choose Final Report

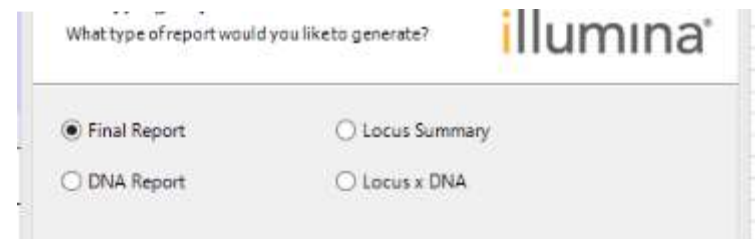

### 3. Choose 'redo with the best' and '10th Percentile GC score'

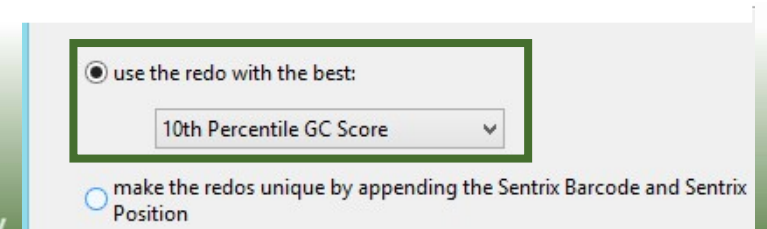



# Creating input files ASSIsT

4. Select all samples/arrays



Chip1  
 Chip2  
 Chip3  
 Chip4

5.-Set format to Standard

-Include the following columns:

GT Score, Theta, R

*\*Order should be the same as figure*

-Select 'Group by SNP'

-Select 'Tab' as delimiter

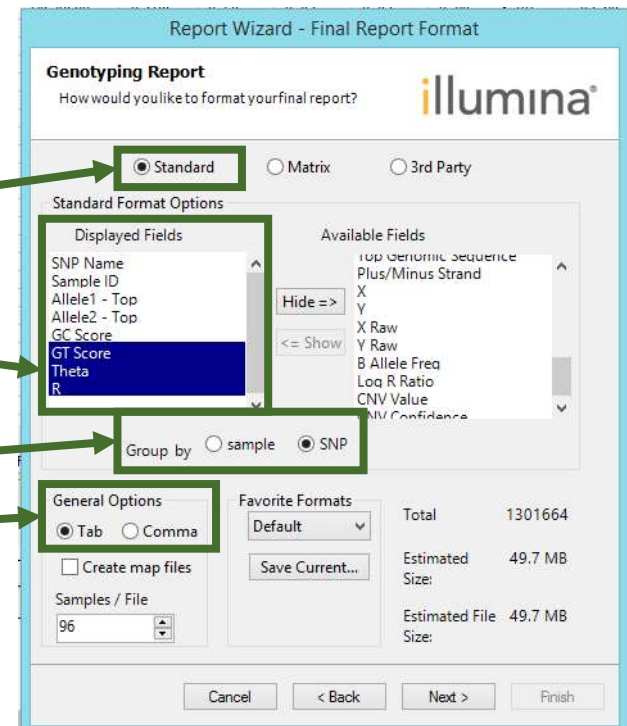

Report Wizard - Final Report Format

Genotyping Report  
How would you like to format your final report? 

Standard  Matrix  3rd Party

Standard Format Options

Displayed Fields

- SNP Name
- Sample ID
- Allele1 - Top
- Allele2 - Top
- GC Score
- GT Score
- Theta
- R

Available Fields

- Top Genomic Sequence
- Plus/Minus Strand
- X
- Y
- X Raw
- Y Raw
- B Allele Freq
- Log R Ratio
- CNV Value
- CNV Confidence

Hide => <=< Show

Group by  sample  SNP

General Options

Tab  Comma

Create map files

Samples / File: 96

Favorite Formats: Default

Save Current...

Total: 1301664  
Estimated Size: 49.7 MB  
Estimated File Size: 49.7 MB

Cancel < Back Next > Finish

6. Save Report

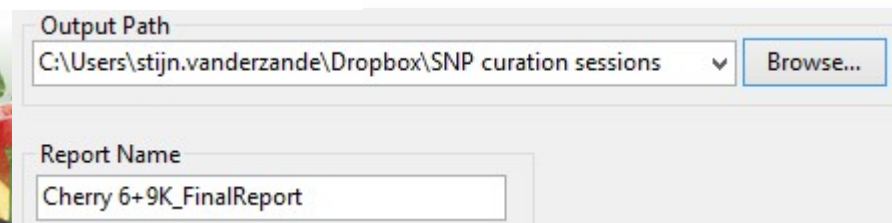

Output Path  
C:\Users\stijn.vanderzande\Dropbox\SNP curation sessions

Report Name  
Cherry 6+9K\_FinalReport

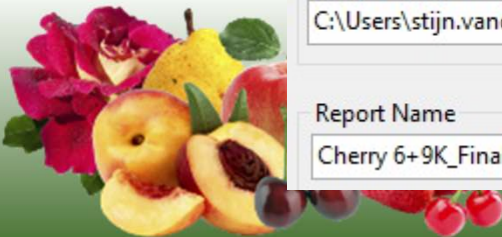

DISEASE RESISTANCE \* HORTICULTURAL QUALITY

# Creating input files ASSIST

## Creating 2<sup>nd</sup> input file (DNA report)

7. Open Report Wizard in GenomeStudio and choose DNA Report

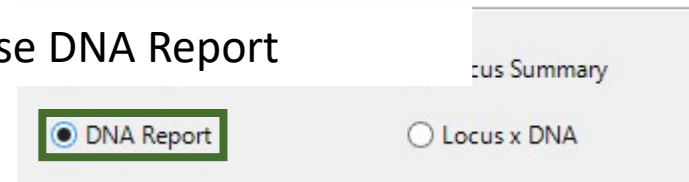

8. Choose 'redo with the best' and '10<sup>th</sup> Percentile GC score'

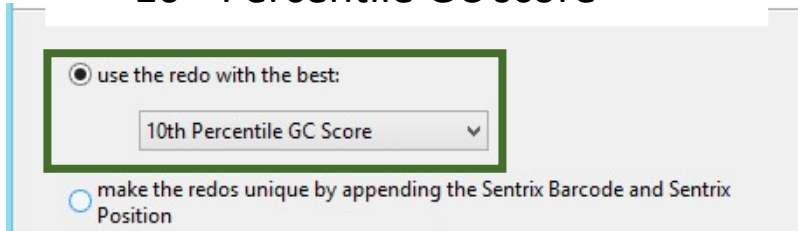

9. Select all samples/arrays

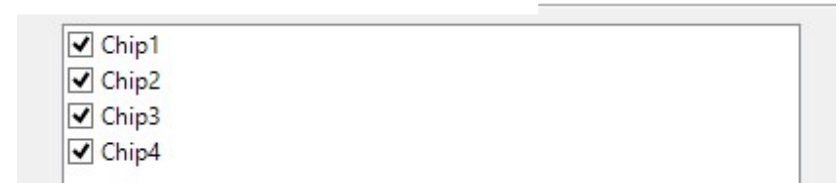

10. Choose Sample ID

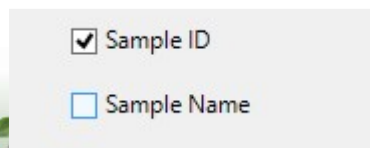

11. Save Report

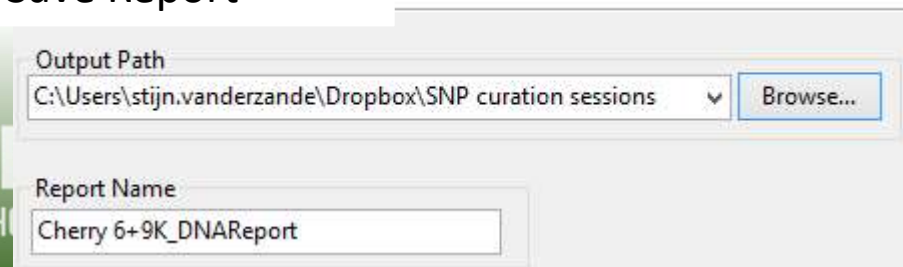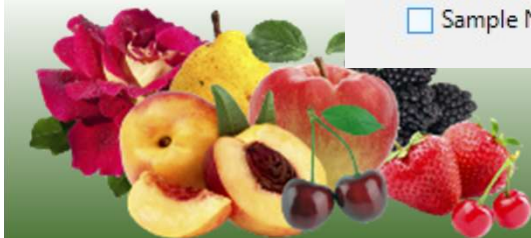

# Input files ASSIsT

## Creating 3rd input file (Pedigree file)

12. Create a three-column file:

-1<sup>st</sup> column has the individual's name

-2<sup>nd</sup> column has the female parent

-3<sup>rd</sup> column has the male parent

-Header row should be “//SampleID [tab] Mother [tab] Father”

\*Copy SampleID and parent columns from sample sheet into Notepad++ and add the header line

\*Parents do not have to be included in sample list

|    | A               | B               | C              |
|----|-----------------|-----------------|----------------|
| 1  | //SampleID      | Mother          | Father         |
| 2  | Abundance       | Napoleon        |                |
| 3  | Corum           |                 |                |
| 4  | Cuvelier        |                 |                |
| 5  | Persian         |                 |                |
| 6  | Benton          | Stella          | Moreau         |
| 7  | Bing            | BlackRepublican | Napoleon       |
| 8  | BlackRepublican | Napoleon        | BlackTartarian |
| 9  | BlackTartarian  |                 |                |
| 10 | Lambert         | Napoleon        | Blackheart     |

```
//SampleID Mother Father
Abundance Napoleon
Corum
Cuvelier
Persian
Benton Stella Moreau
Bing BlackRepublican Napoleon
BlackRepublican Napoleon BlackTartarian
BlackTartarian
Lambert Napoleon Blackheart
```

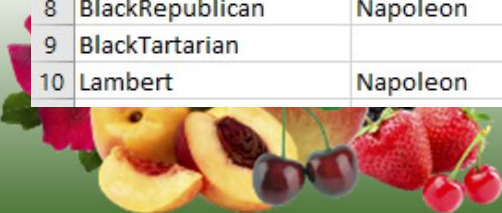

# Input files ASSIsT

## Optional - Creating 4th input file (Map file)

13. Create a three-column file:

-1<sup>st</sup> column has the SNP's name/SNP's ID

-2<sup>nd</sup> column has the chromosome (numerical)

-3<sup>rd</sup> column has the position (physical (bp, Mbp) or genetic (cM))

-Header row should be “//SNPid [tab] Chromosome [tab] Position”

\*Copy Name, Chr and Position from exported Full Data Table and convert chromosome to numeric if needed

\*Use genetic position if available

\*Give fictional chromosome number to chloroplast/mitochondrial/... SNPs

|   | A       | B          | C        | D | E |
|---|---------|------------|----------|---|---|
| 1 | //SNPid | Chromosome | Position |   |   |
| 2 | CBP     | 8          | 14629699 |   |   |
| 3 | CBP_2   | 8          | 14629699 |   |   |
| 4 | CBPb    | 1          | 37474346 |   |   |
| 5 | CBPc    | 2          | 3108977  |   |   |
| 6 | CBPc_2  | 2          | 3108977  |   |   |
| 7 | CLF     | 7          | 15025402 |   |   |

|   |         |            |          |
|---|---------|------------|----------|
| 1 | //SNPid | Chromosome | Position |
| 2 | CBP     | 8          | 14629699 |
| 3 | CBP_2   | 8          | 14629699 |
| 4 | CBPb    | 1          | 37474346 |
| 5 | CBPc    | 2          | 3108977  |
| 6 | CBPc_2  | 2          | 3108977  |
| 7 | CLF     | 7          | 15025402 |

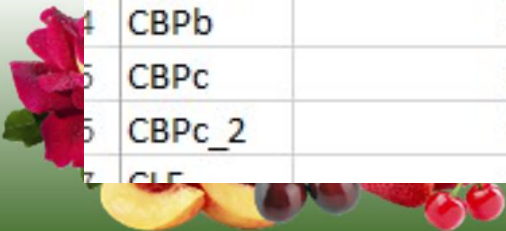

# Running ASSIsT

1. Open ASSIsT



|                               |                  |                       |                 |
|-------------------------------|------------------|-----------------------|-----------------|
| _ssl.pyd                      | 5/5/2016 6:33 PM | PYD File              | 879 KB          |
| _tkinter.pyd                  | 5/5/2016 6:33 PM | PYD File              | 34 KB           |
| _win32sysloader.pyd           | 5/5/2016 6:33 PM | PYD File              | 8 KB            |
| assist.ico                    | 5/5/2016 6:33 PM | Icon                  | 222 KB          |
| assist.png                    | 5/5/2016 6:33 PM | PNG image             | 209 KB          |
| <b>ASSIsT_Win_v1.01.exe</b>   | 5/5/2016 6:33 PM | <b>Application</b>    | <b>5,025 KB</b> |
| ASSIsT_Win_v1.01.exe.manifest | 5/5/2016 6:33 PM | MANIFEST File         | 1 KB            |
| bz2.pyd                       | 5/5/2016 6:33 PM | PYD File              | 67 KB           |
| LIBEAY32.dll                  | 5/5/2016 6:33 PM | Application extens... | 1,075 KB        |

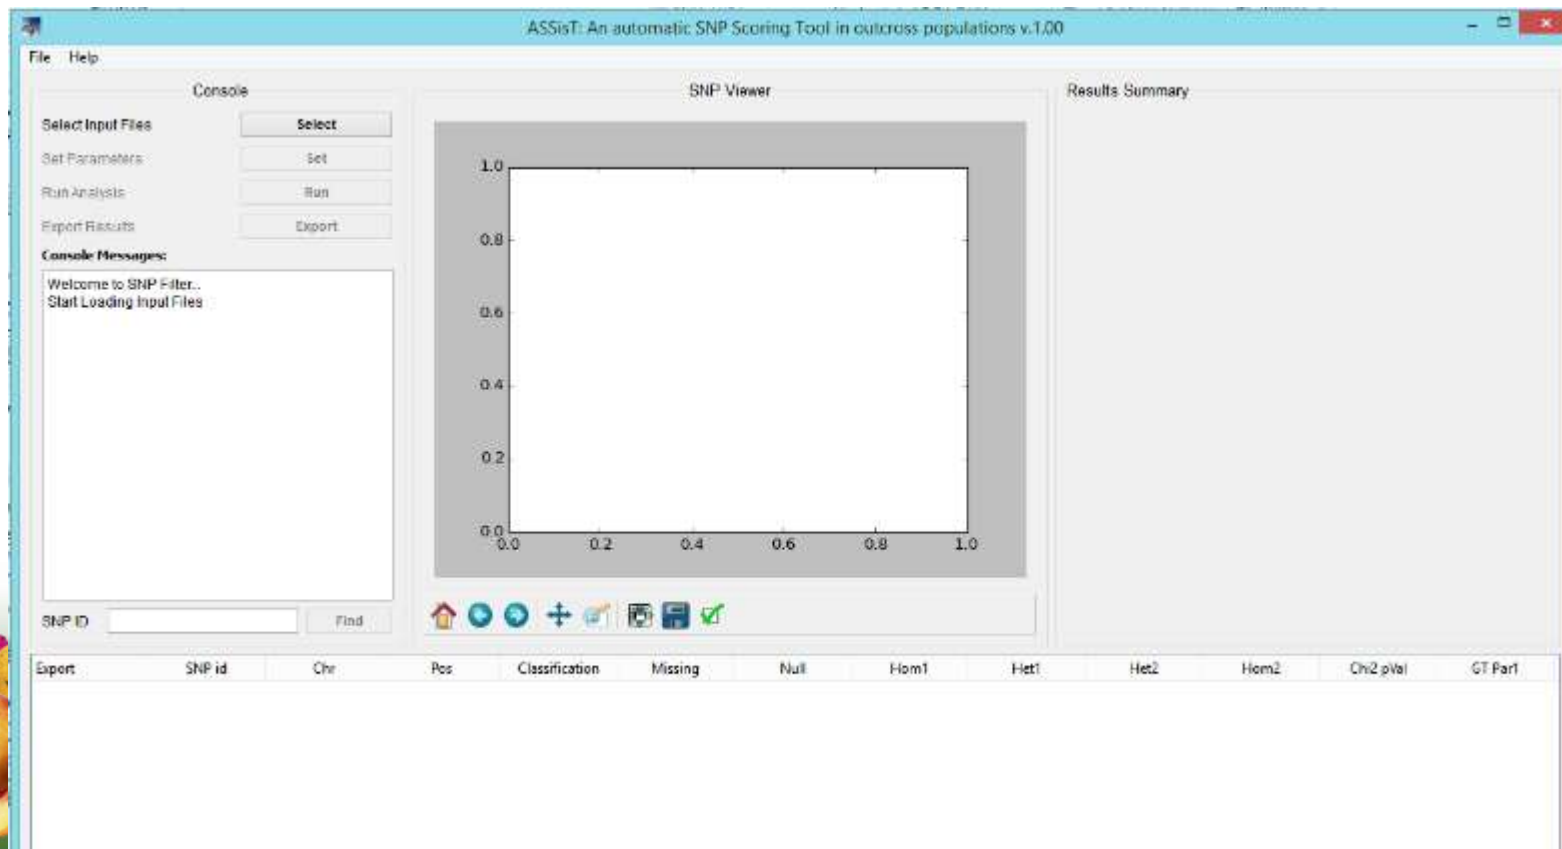

ASSIsT: An automatic SNP Scoring Tool in outcross populations v.1.00

File Help

Console

Select Input Files

Set Parameters

Run Analysis

Export Results

Console Messages:

Welcome to SNP Filter..  
Start Loading Input Files

SNP ID

SNP Viewer

Results Summary

| Export | SNP id | Chr | Pos | Classification | Missing | Null | Hom1 | Het1 | Het2 | Hom2 | Ch2 pval | GT Part |
|--------|--------|-----|-----|----------------|---------|------|------|------|------|------|----------|---------|
|--------|--------|-----|-----|----------------|---------|------|------|------|------|------|----------|---------|



# Running ASSIsT

2. In console section, click on 'Select' next to 'Select Input Files'

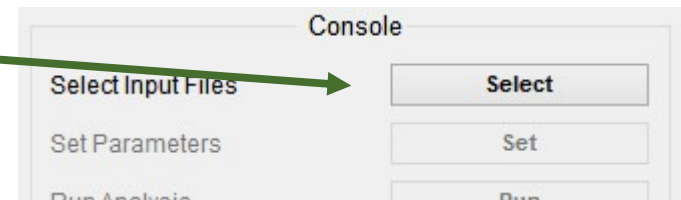

3. Click on '...' boxes to choose each file created earlier. Once each file is chosen, click 'OK'.

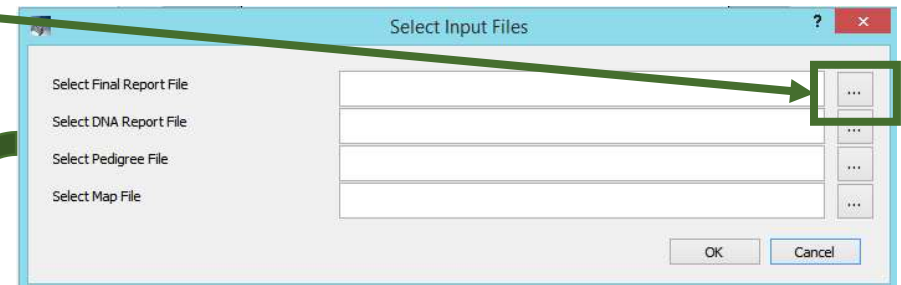

## Console Messages:

Welcome to SNP Filter...  
Start Loading Input Files  
Editing Input files... done.  
Files looking OK.  
Can now proceed to setting parameters.

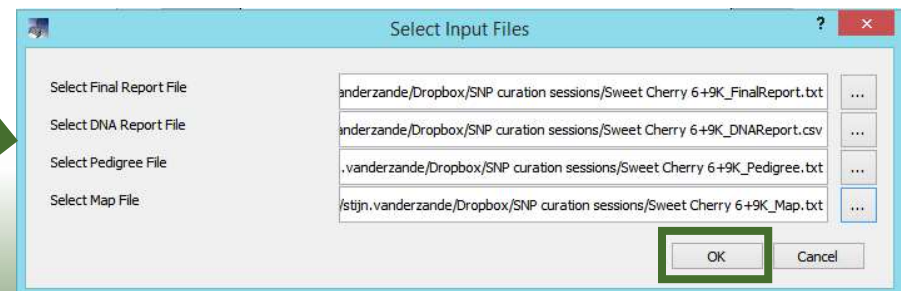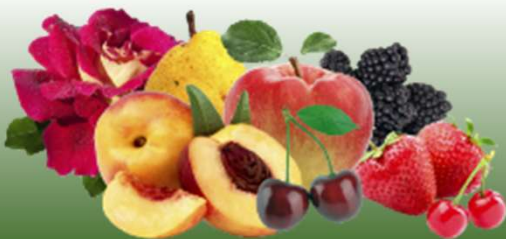

**RosBREED**  
DISEASE RESISTANCE × HORTICULTURAL QUALITY

# Running ASSIsT

4. In console section, click on 'Set' next to 'Set Parameters'

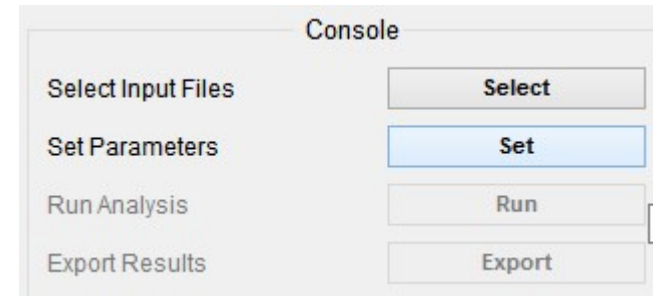

5. Set Parameters as follows:

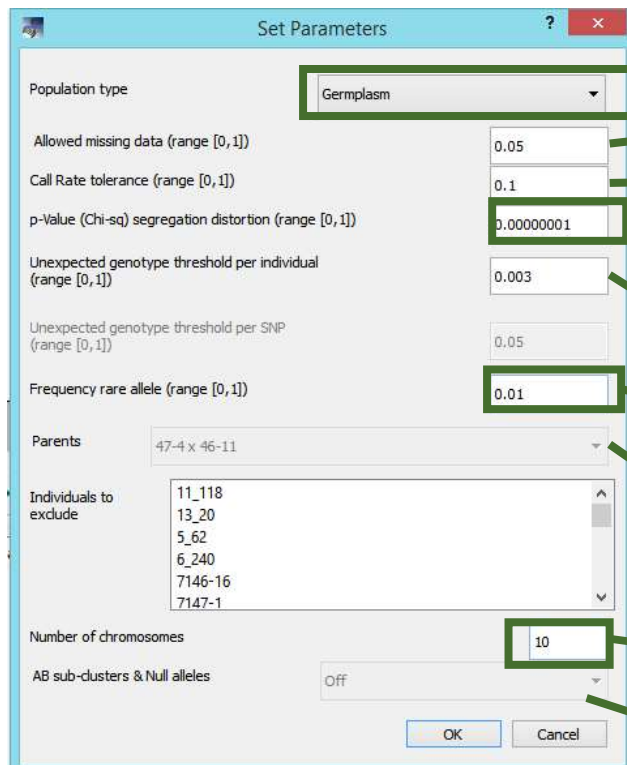

-CP (F1) for (large) F1 population  
-Germplasm in most other cases for us

Proportion of allowed missing data

How much can an individual's call rate differ from population mean

How much segregation distortion is allowed?  
\*lower means more distortion is allowed

Proportion of allowed inconsistencies between child and parents per SNP

Maximum frequency to define an allele as rare  
\*Only when Germplasm is chosen

Parents (CP (F1), BCx) or grandparents (F2) of the analyzed experimental population.

Chromosome number  
\*Take "extra" chromosomes into account

Check for Null alleles and AB sub-clusters  
\*Only for CP (F1) and BC

# Running ASSIsT

6. Run the analysis

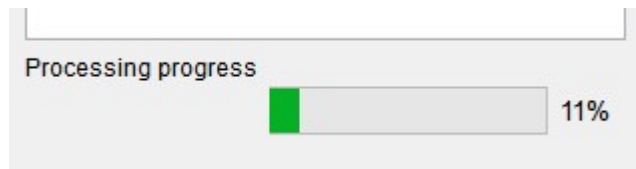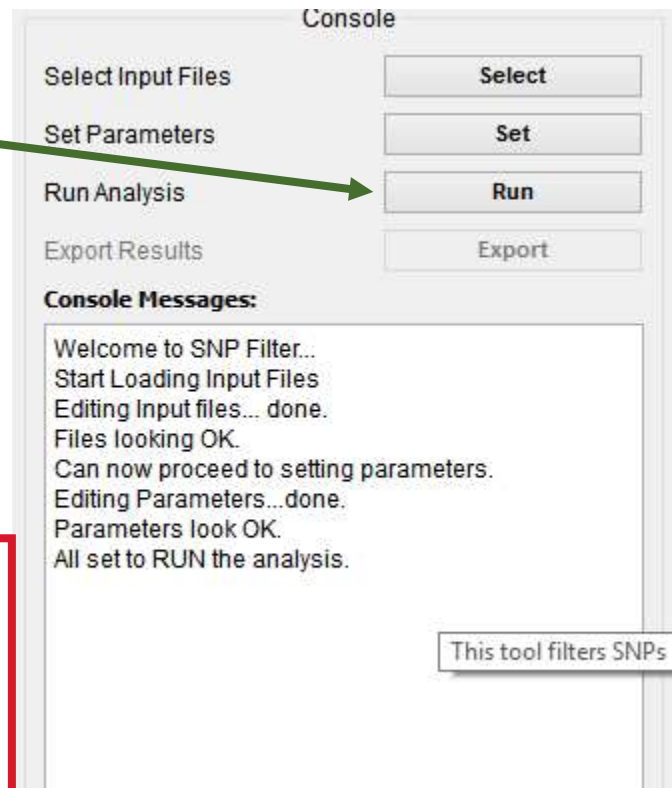

Console

Select Input Files

Set Parameters

Run Analysis

Export Results

**Console Messages:**

Welcome to SNP Filter..  
Start Loading Input Files  
Editing Input files... done.  
Files looking OK.  
Can now proceed to setting parameters.  
Editing Parameters...done.  
Parameters look OK.  
All set to RUN the analysis.

This tool filters SNPs

## Note:

ASSIsT may stop responding when switching to other programs during the analysis. ASSIsT is still working and after a few minutes, it will show the results of the analysis

ASSIsT: An automatic SNP Scoring Tool in outcross populations v.1.00 (Not Responding)

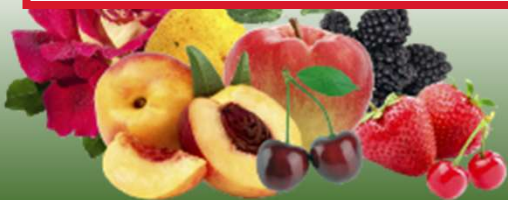

**RosBREED**  
DISEASE RESISTANCE × HORTICULTURAL QUALITY

# Results ASSIsT

SNP Graph similar to GenomeStudio  
\*non-interactive

The screenshot shows the ASSIsT software interface. On the left is a control panel with buttons for 'Select', 'Set', 'Run', and 'Export', and a 'Console Messages' window. The center features a 'SNP Viewer' window displaying a scatter plot of  $r$  vs Theta for the SNP 'RosBREED\_snp\_sweet\_5\_04486238'. The plot shows data points for genotypes AA (red), BB (blue), AB (purple), and NC/OO (grey). On the right is a 'Results Summary' window with a table of SNP classification for 383 individuals. At the bottom is a table of results for each SNP, ordered by classification and then by chromosome and position.

**Results Summary**

Number of SNPs: 13559  
 Number of offsprings (Outcross): 383 (0)  
 Total number of individual in FinalReport: 383  
 Number of excluded samples (Poor quality DNA): 0

**SNP Classification (383 individuals):**

|                           | #           | %           |
|---------------------------|-------------|-------------|
| <b>Approved</b>           | <b>6159</b> | <b>45.4</b> |
| - Robust                  | 1479        | 10.9        |
| - OneHomozygRare_HWE      | 1677        | 12.4        |
| - OneHomozygRare_NotHWE   | 1507        | 11.1        |
| - DistortedAndUnexpSegreg | 1496        | 11.0        |
| <b>Discarded</b>          | <b>7400</b> | <b>54.6</b> |
| - Monomorphic             | 632         | 4.7         |
| - Failed                  | 2716        | 20.0        |
| - ShiftedHomo             | 4001        | 29.5        |
| - NullAllele-Failed       | 51          | 0.4         |

  

| Export                              | SNP id             | Chr | Pos         | Classification | Missing | Null | Hom1 | Het1 | Het2 | Hom2 | Chi2 pVal | GT Par1 |
|-------------------------------------|--------------------|-----|-------------|----------------|---------|------|------|------|------|------|-----------|---------|
| <input checked="" type="checkbox"/> | RosBREED_snp_...   | 5   | 4.41373e+06 | Robust         | 15      | 0    | 56   | 168  | 0    | 142  | 0.588     | --      |
| <input checked="" type="checkbox"/> | RosBREED_snp_...   | 5   | 4.48624e+06 | Robust         | 13      | 0    | 63   | 159  | 0    | 146  | 0.086     | --      |
| <input checked="" type="checkbox"/> | RosBREED_snp_...   | 5   | 4.71063e+06 | Robust         | 17      | 0    | 54   | 171  | 0    | 143  | 0.804     | --      |
| <input checked="" type="checkbox"/> | scaffold_5:4729... | 5   | 4.73025e+06 | Robust         | 22      | 0    | 42   | 153  | 0    | 164  | 0.491     | --      |

Results for each SNP  
Ordered by Classification, then by Chromosome and Position

# Results ASSIsT

Results Summary

Number of SNPs: 13559

Number of offsprings (Outcross): 383 (0)

Total number of individual in FinalReport: 383

Number of excluded samples (Poor quality DNA): 0

SNP Classification (383 individuals):

|                           | #           | %           |
|---------------------------|-------------|-------------|
| <b>Approved</b>           | <b>6159</b> | <b>45.4</b> |
| - Robust                  | 1479        | 10.9        |
| - OneHomozygRare_HWE      | 1677        | 12.4        |
| - OneHomozygRare_NoHWE    | 1507        | 11.1        |
| - DistortedAndUnexpSegreg | 1496        | 11.0        |
| <b>Discarded</b>          | <b>7400</b> | <b>54.6</b> |
| - Monomorphic             | 632         | 4.7         |
| - Failed                  | 2716        | 20.0        |
| - ShiftedHomo             | 4001        | 29.5        |
| - NullAllele-Failed       | 51          | 0.4         |

# of excluded samples

SNPs used for further curation

Discarded SNPs\*

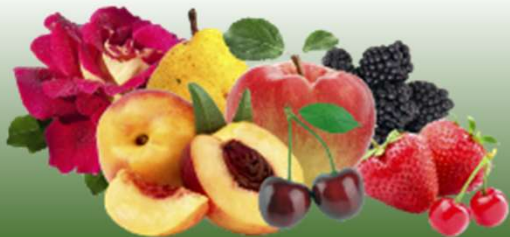

**RosBREED**  
DISEASE RESISTANCE × HORTICULTURAL QUALITY

\*Note:  
Shifted-Homo SNPs were added back in but many required manual adjustment of clustering



# Export Results

1. Click on "Export" button in console section

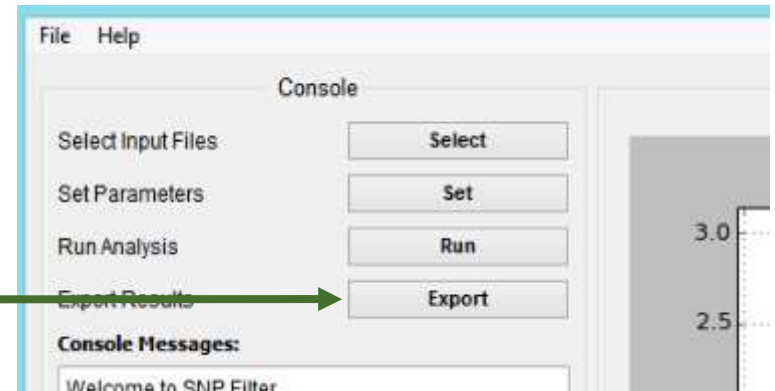

2.-Choose the files you want (next slide)

-Choose folder to save files in

-Choose name for files

**\*Avoid spaces in file names**

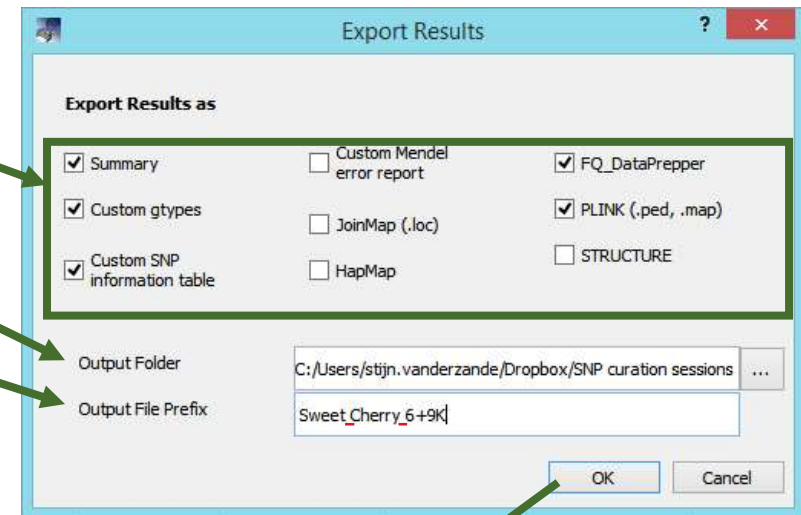

| <input type="checkbox"/>            | Name                                 | Date modified     | Type                 | Size      |
|-------------------------------------|--------------------------------------|-------------------|----------------------|-----------|
| <input checked="" type="checkbox"/> | Sweet Cherry 6+9K_FQ_DataPrepper.txt | 10/2/2018 6:43 PM | TXT File             | 10,322 KB |
| <input checked="" type="checkbox"/> | Sweet Cherry 6+9K_gtypes.csv         | 10/2/2018 6:43 PM | Microsoft Excel C... | 7,414 KB  |
| <input checked="" type="checkbox"/> | Sweet Cherry 6+9K_plink_in.map       | 10/2/2018 6:43 PM | MAP File             | 227 KB    |
| <input checked="" type="checkbox"/> | Sweet Cherry 6+9K_plink_in.ped       | 10/2/2018 6:43 PM | PED File             | 9,223 KB  |
| <input checked="" type="checkbox"/> | Sweet Cherry 6+9K_snp_info_table.csv | 10/2/2018 6:43 PM | Microsoft Excel C... | 1,274 KB  |
| <input checked="" type="checkbox"/> | Sweet Cherry 6+9K_summary.txt        | 10/2/2018 6:43 PM | TXT File             | 2 KB      |
| <input type="checkbox"/>            | Sweet Cherry 6+9K_Map.txt            | 10/2/2018 5:23 PM | TXT File             | 453 KB    |

# Export Results

Summary

Summarizes Parameter settings and Results (as shown on the right in ASSIsT)

```

Parameter Set
Population type:   Germplasm
Allowed missing data: 0.1
Call Rate tolerance: 0.1
p-Value (Chi-sq) segregation distortion: 1e-08
Unexpected genotype threshold: 0.009
Frequency rare allele: 0.01
Number of chromosomes: 10
AB sub-clusters & Null alleles: Off
    
```

|                         |      |      |
|-------------------------|------|------|
| Approved                | 6159 | 45.4 |
| Robust                  | 1479 | 10.9 |
| OneHomozygRare_HWE      | 1677 | 12.4 |
| OneHomozygRare_NotHWE   | 1507 | 11.1 |
| DistortedAndUnexpSegreg | 1496 | 11.0 |
| Discarded               | 7400 | 54.6 |
| Monomorphic             | 632  | 4.7  |
| Failed                  | 2716 | 20.0 |
| ShiftedHomo             | 4001 | 29.5 |
| NullAllele-Failed       | 51   | 0.4  |

Custom gtypes

Gives genotype for each individual and each **approved** SNP

|   | A        | B   | C     | D           | E       | F    | G    | H    | I    | J    | K         | L     | M     | N    | O     |     |
|---|----------|-----|-------|-------------|---------|------|------|------|------|------|-----------|-------|-------|------|-------|-----|
| 1 | SNP id   | Chr | Pos   | Classificat | Missing | Null | Hom1 | Het1 | Het2 | Hom2 | Chi-Squar | 1_118 | 13_20 | 5_62 | 6_240 | 714 |
| 2 | RosBREE  | 1   | 43011 | Distorted   | 25      | 0    | 14   | 265  | 0    | 77   | 0         |       |       | AG   | AG    | AG  |
| 3 | scaffold | 1   | 43481 | OneHomc     | 15      | 0    | 2    | 288  | 0    | 76   | 0         |       |       | AC   | AC    | AC  |
| 4 | RosBREE  | 1   | 51332 | OneHomc     | 13      | 0    | 357  | 9    | 0    | 2    | 0         |       |       | AA   | AA    | AA  |
| 5 | S1_54448 | 1   | 54446 | OneHomc     | 4       | 0    | 358  | 18   | 0    | 1    | 0         |       |       | AA   | AA    | AA  |
| 5 | scaffold | 1   | 56261 | OneHomc     | 12      | 0    | 1    | 8    | 0    | 360  | 0         |       |       | GG   | GG    | GG  |
| 7 | RocRFF   | 1   | 94695 | OneHomc     | 11      | 0    | 356  | 17   | 0    | 2    | 0         |       |       | AA   | AA    | AA  |

SNPs are ordered according to their position

Genotype score and individuals missaligned?!

Genotypes calls

Custom SNP information table

Gives results of analysis for each SNP (as shown on the bottom in ASSIsT)

PLINK (.ped, .map)

Two files (.ped and .map) needed to run PLINK and identify unknown duplicates (see further)

FQ\_DataPrepper

Helps create FlexQTL files needed for further data curation (see next sessions)



United States  
Department of  
Agriculture

National Institute  
of Food and  
Agriculture

# duplicates

## RosBREED

DISEASE  
RESISTANCE



HORTICULTURAL  
QUALITY



SUPERIOR  
CULTIVARS



# Known duplicates

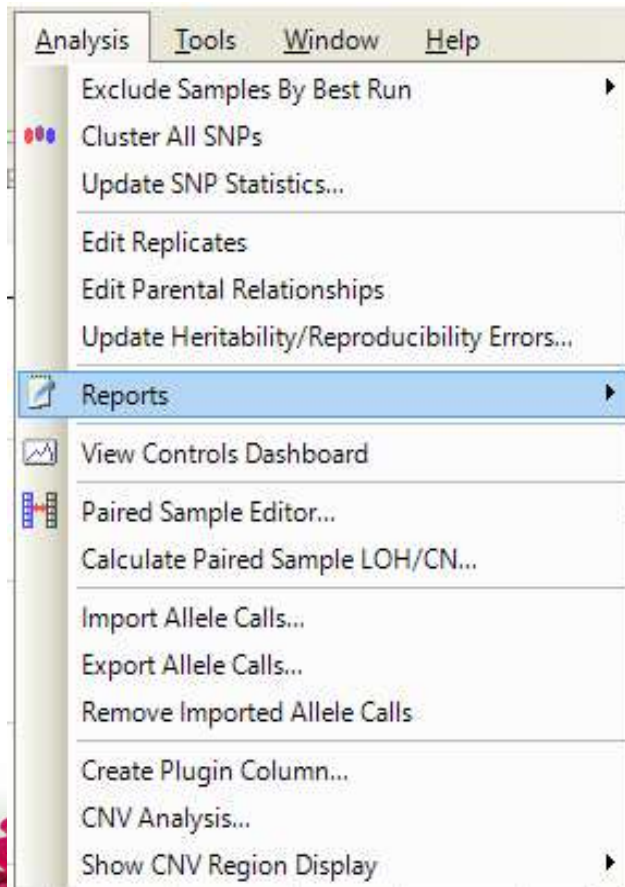

1. Create Reproducibility and Heritability report in GenomeStudio

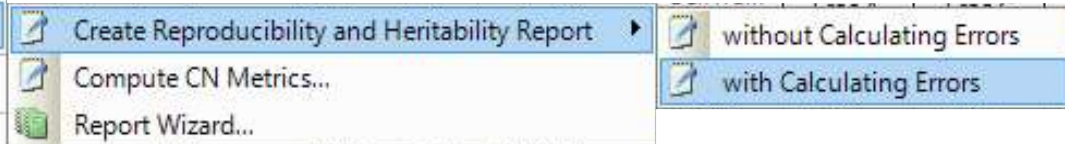

2. Choose name and save file

Sweet Cherry 6+9K Reproducibility and Heritability Report.csv

CSV Files (\*.csv)

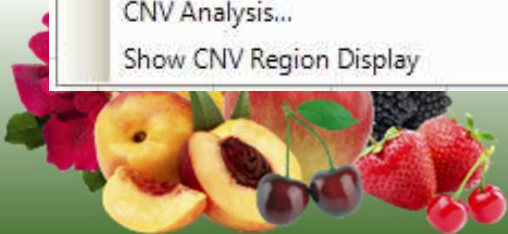

# Known duplicates

1. Open Reproducibility and Heritability report  
Duplicate comparison found under 'Duplicate Reproducibility'

| Rep1_DNA_Name   | Rep2_DNA_Name   | # Correct | # Errors | Total | Repro_Freq |
|-----------------|-----------------|-----------|----------|-------|------------|
| Bing            | Bing_rep01      | 8829      | 647      | 9476  | 0.965258   |
| Bing_rep01      | Bing            | 8829      | 647      | 9476  | 0.965258   |
| FR070T105       | FR070T105_rep01 | 11139     | 2        | 11141 | 0.99991    |
| FR070T105_rep01 | FR070T105       | 11139     | 2        | 11141 | 0.99991    |
| FR072T074       | FR072T074_rep01 | 11150     | 0        | 11150 | 1          |

Name Individual

Name Duplicate

Number consistent  
genotype calls

Number inconsistent  
genotype calls

Proportion inconsistent  
genotype calls



**RosBREED**

DISEASE RESISTANCE × HORTICULTURAL QUALITY



# Finding unknown duplicates

1. Copy .ped and .map file into PLINK folder  
ASSIST output

|                                | Date modified     | Type     | Size |
|--------------------------------|-------------------|----------|------|
| Sweet Cherry 6+9K_plink_in.map | 10/2/2018 6:43 PM | MAP File |      |
| Sweet Cherry 6+9K_plink_in.ped | 10/2/2018 6:43 PM | PED File |      |

2. Hold 'shift' and right click in the PLINK folder to get
  - a. the "Open command window here" option
  - b. the "Open PowerShell window here" option

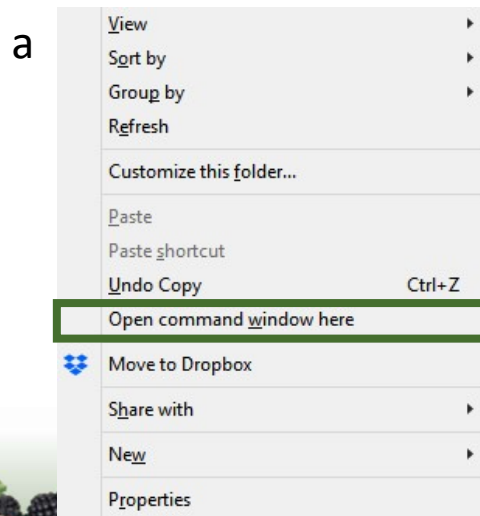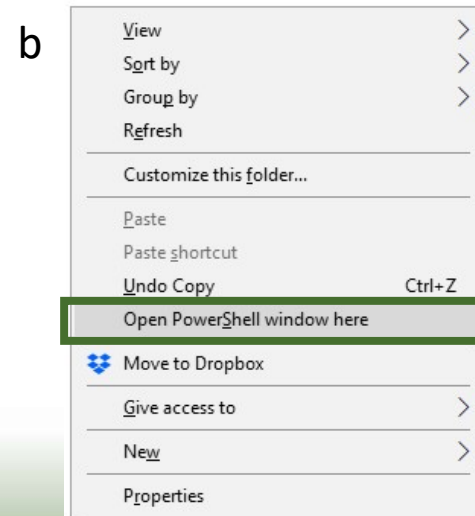

3. (left) click on "Open command window here"/"Open PowerShell window here" to open the respective window

# Using Plink – a. command window

4. Start with “plink.exe” then add additional commands with space between each. Press enter when all commands are given

\*change “filename” to name of .ped and .map file

```
C:\Users\stijn.vanderzande\Documents\Software\PLINK 1.90>plink.exe --file Sweet_Cherry_6+9K --missing-genotype - --genome full
```

```
© 2005–2016 Shaun Purcell, Christopher Chang GNU General Public License v3
Logging to plink.log.
Options in effect:
--file Sweet_Cherry_6+9K
--genome full
--missing-genotype -

12248 MB RAM detected; reserving 6124 MB for main workspace.
.ped scan complete (for binary autoconversion).
Performing single-pass .bed write (6159 variants, 383 people).
--file: plink-temporary.bed + plink-temporary.bin + plink-temporary.fam
written.
6159 variants loaded from .bin file.
383 people (0 males, 0 females, 383 ambiguous) loaded from .fam.
Ambiguous sex IDs written to plink.nosex.
Using up to 8 threads (change this with --threads).
Before main variant filters, 383 founders and 0 nonfounders present.
Calculating allele frequencies... done.
Total genotyping rate is 0.968226.
6159 variants and 383 people pass filters and QC.
Note: No phenotypes present.
IBD calculations complete.
Finished writing plink.genome .
```

Expects same name for .ped and .map file

\*e.g. Sweet\_Cherry\_6+9K.ped and Sweet\_Cherry\_6+9K.map

\*NO blank spaces in name

## Input file characterization

--file *filename*

Define files, change *filename* to name of ped and map file

--no-fid

when FID column is missing

--no-sex

when sex column is missing

--allow-no-sex

when sex column is missing, needed for some analyses

--no-pheno

when phenotype column is missing

--missing-genotype *N*

Define missing genotype (*N*) when different from 0

## Analysis

--genome full

calculate IBD (IBS) for all individuals

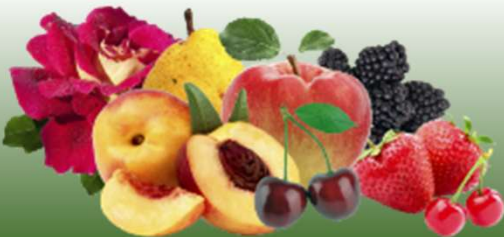

ROSE  
DISEASE

# Using Plink – b. PowerShell window

4. Start with “.\plink.exe” then add additional commands with space between each. Press enter when all commands are given

\*change “filename” to name of .ped and .map file

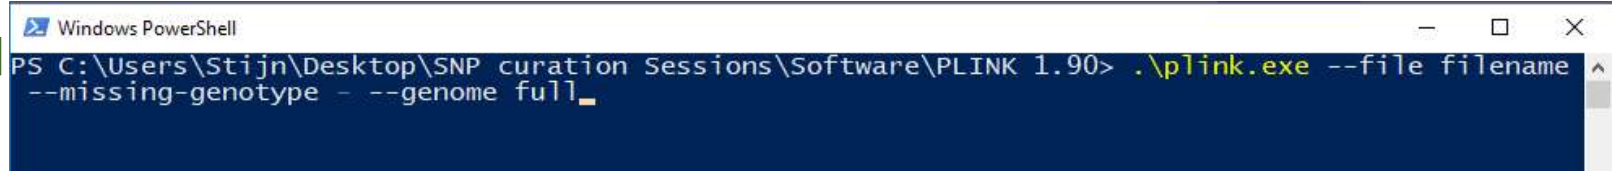

```
Windows PowerShell
PS C:\Users\Stijn\Desktop\SNP curation Sessions\Software\PLINK 1.90> .\plink.exe --file filename
--missing-genotype - --genome full_
```

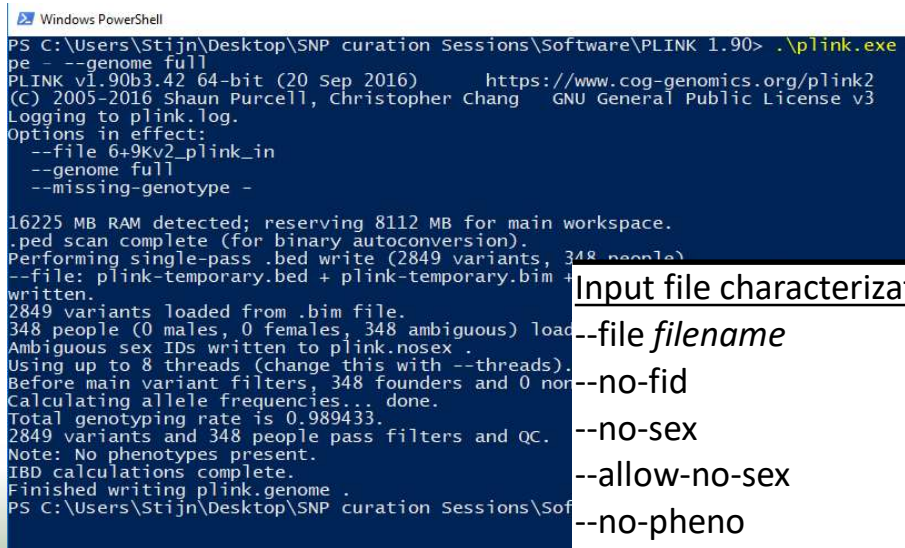

```
Windows PowerShell
PS C:\Users\Stijn\Desktop\SNP curation Sessions\Software\PLINK 1.90> .\plink.exe
--genome full
PLINK v1.90b3.42 64-bit (20 Sep 2016)      https://www.cog-genomics.org/plink2
(C) 2005-2016 Shaun Purcell, Christopher Chang  GNU General Public License v3
Logging to plink.log.
Options in effect:
  --file 6+9Kv2_plink_in
  --genome full
  --missing-genotype -

16225 MB RAM detected; reserving 8112 MB for main workspace.
.ped scan complete (for binary autoconversion).
Performing single-pass .bed write (2849 variants, 348 people)
--file: plink-temporary.bed + plink-temporary.bim +
written.
2849 variants loaded from .bim file.
348 people (0 males, 0 females, 348 ambiguous) load
Ambiguous sex IDs written to plink.nosex .
Using up to 8 threads (change this with --threads).
Before main variant filters, 348 founders and 0 nor
Calculating allele frequencies... done.
Total genotyping rate is 0.989433.
2849 variants and 348 people pass filters and QC.
Note: No phenotypes present.
IBD calculations complete.
Finished writing plink.genome .
PS C:\Users\Stijn\Desktop\SNP curation Sessions\So
```

Expects same name for .ped and .map file  
\*e.g. Sweet\_Cherry\_6+9K.ped and Sweet\_Cherry\_6+9K.map  
\*NO blank spaces in name

## Input file characterization

- file *filename* Define files, change *filename* to name of ped and map file when FID column is missing
- no-fid when FID column is missing
- no-sex when sex column is missing
- allow-no-sex when sex column is missing, needed for some analyses
- no-pheno when phenotype column is missing
- missing-genotype *N* Define missing genotype (*N*) when different from 0

## Analysis

- genome full calculate IBD (IBS) for all individuals

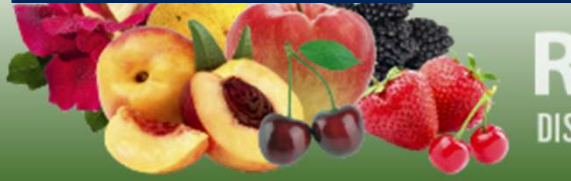

# Using Plink

5. Open plink.genome with Excel

|                |                    |             |           |
|----------------|--------------------|-------------|-----------|
| ✓ plink.genome | 10/3/2018 10:07 AM | GENOME File | 12,151 KB |
| plink.log      | 10/3/2018 10:07 AM | LOG File    | 2 KB      |

6. Select first column, use “Text to Columns” to create separate columns

The screenshot shows the Excel 'Text to Columns' wizard. The 'Original data type' section has 'Delimited' selected. The 'Delimiters' section has 'Space' checked. A green arrow points from the 'Text to Columns' button in the ribbon to the 'Delimited' radio button. Another green arrow points from the 'Space' checkbox to the 'Delimiters' section header.

Original data type  
Choose the file type that best describes your data:  
 Delimited - Characters such as commas or tabs separate each field.  
 Fixed width - Fields are aligned in columns with spaces between each field.

Delimiters  
 Tab  
 Semicolon  
 Comma  
 Space  
 Other:

7. Sort according to the “PI\_HAT” column, “Largest to Smallest”

The screenshot shows the Excel 'Sort' dialog box. The 'Sort by' dropdown is set to 'PI\_HAT' and the 'Order' dropdown is set to 'Largest to Smallest'. A green arrow points from the 'Sort' button in the ribbon to the dialog box.

| Column         | Sort On | Order               |
|----------------|---------|---------------------|
| Sort by PI_HAT | Values  | Largest to Smallest |



# Plink Results

| Individual 1 |                  | Individual 2 |                   | IBS    | HE | DST      | PPC | RATIO | IBS0 | IBS1 | IBS2 | HOMH | HETHET |
|--------------|------------------|--------------|-------------------|--------|----|----------|-----|-------|------|------|------|------|--------|
| FID1         | IID1             | FID2         | IID2              | PI_HAT |    |          |     |       |      |      |      |      |        |
|              | MBigarreau_dup02 |              | MBigarreau_dup01  | 1      | -1 | 1        | 1   | NA    | 0    | 0    | 2805 | 0    | 232    |
|              | Lambert          |              | KootenayLambert   | 1      | -1 | 1        | 1   | NA    | 0    | 0    | 2849 | 0    | 218    |
|              | 99F/132R4        |              | 99F131_RJ         | 1      | -1 | 1        | 1   | NA    | 0    | 0    | 2849 | 0    | 260    |
|              | MertonBigarreau  |              | MBigarreau_dup02  | 0.9995 | -1 | 0.999824 | 1   | NA    | 0    | 1    | 2842 | 0    | 234    |
|              | MertonBigarreau  |              | MBigarreau_dup01  | 0.9995 | -1 | 0.999822 | 1   | NA    | 0    | 1    | 2806 | 0    | 232    |
|              | Skeena           |              | Santina_dup01     | 0.9985 | -1 | 0.999473 | 1   | NA    | 0    | 3    | 2842 | 0    | 197    |
|              | Santina_dup01    |              | Santina           | 0.9985 | -1 | 0.999473 | 1   | NA    | 0    | 3    | 2842 | 0    | 197    |
|              | MertonHeart      |              | MertonHeart_dup01 | 0.9984 | -1 | 0.999422 | 1   | NA    | 0    | 3    | 2590 | 0    | 249    |
|              | Hedelfingen      |              | Hedelfingendup01  | 0.998  | -1 | 0.999295 | 1   | NA    | 0    | 4    | 2833 | 0    | 261    |
|              | StarBlush        |              | StarBlush_dup01   | 0.997  | -1 | 0.99894  | 1   | NA    | 0    | 6    | 2824 | 0    | 231    |
|              | SandraRose_dup01 |              | SandraRose        | 0.9892 | -1 | 0.99618  | 1   | NA    | 0    | 21   | 2728 | 0    | 222    |
|              | Vega             |              | Cv1               | 0.976  | -1 | 0.991929 | 1   | NA    | 1    | 40   | 2561 | 0    | 213    |
|              | FR063T023        |              | FR055T064         | 0.8279 | -1 | 0.939648 | 1   | 97    | 1    | 300  | 2201 | 1    | 97     |

0.97 as cutoff for duplicates



**RosBREED**  
DISEASE RESISTANCE × HORTICULTURAL QUALITY



# Duplicate triploids

- Calls should be the same between duplicates
  - Are AB calls identical?
    - Could be AAB or ABB
    - B allele frequency
      - Should both be 0.33 or 0.66
      - Correlation between identically called individuals

| IID1           | FII IID2           | PI_HAT |
|----------------|--------------------|--------|
| 1 "PommeHervi" | 1 "StreepingAlken" | 1      |
| 1 "ZoeteAagt"  | 1 "BelledeFumes"   | 1      |

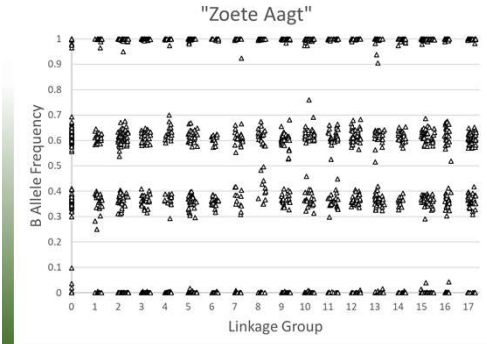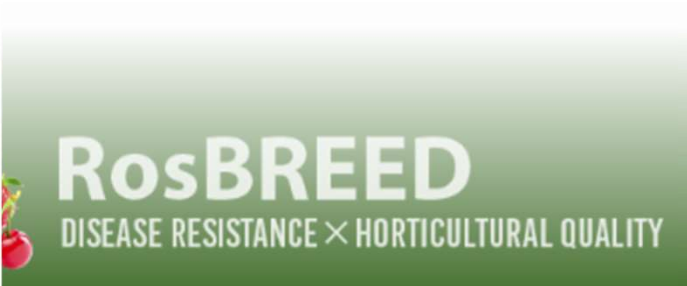

“Zoete Aagt” vs. “BelledeFumes”

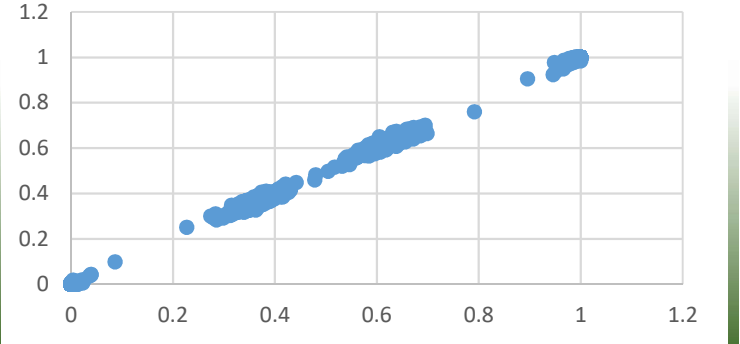



United States  
Department of  
Agriculture

National Institute  
of Food and  
Agriculture

# Pedigree check

## RosBREED

DISEASE  
RESISTANCE



HORTICULTURAL  
QUALITY



SUPERIOR  
CULTIVARS



# Checking parent-child relationships

1. Open 'Reproducibility and Heritability' report created earlier for known duplicates
  - A. Parent-child errors found under 'P-C Heritability'

| P-C Heritability | Child_DNA_Name | Parent_DNA_Name | # Correct | # Errors | Total | P-C Heritability Freq |
|------------------|----------------|-----------------|-----------|----------|-------|-----------------------|
|                  | Abundance      | Napoleon        | 0         | 0        | 0     | N/A                   |
|                  | Burbank        | EarlyPGuigne    | 0         | 0        | 0     | N/A                   |
|                  | Coe            | OxHeart         | 0         | 0        | 0     | N/A                   |
|                  | Summit         | Van             | 0         | 0        | 0     | N/A                   |
|                  | Kordia         | Schneiders      | 11593     | 2        | 11595 | 0.9998275             |
|                  | Sunburst       | Summit          | 11601     | 8        | 11609 | 0.9993109             |

Only when parent in dataset

Name child

Name Parent

Number genotype calls without PC error

Number genotype calls with PC error

Proportion genotype calls with PC error

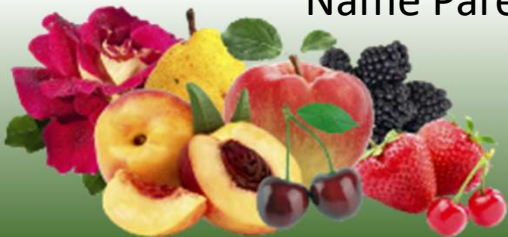

**ROSBREED**  
DISEASE RESISTANCE × HORTICULTURAL QUALITY

# Checking parent-parent-child relationships

1. Open 'Reproducibility and Heritability' report created earlier for known duplicates
  - B. Parent-child errors found under 'P-P-C Heritability'

| Child_DNA_Name | Parent1_DNA_Name | Parent2_DNA_Name | # Correct | # Errors | Total | P-P-C Heritability Freq |
|----------------|------------------|------------------|-----------|----------|-------|-------------------------|
| Chelan         | Stella           | Moreau           | 11554     | 12       | 11566 | 0.999                   |
| Index          | Stella           | Bing             | 11551     | 12       | 11563 | 0.999                   |
| Benton         | Stella           | Moreau           | 11541     | 15       | 11556 | 0.9987                  |
| Vic            | Bing             | Schmidt          | 11542     | 20       | 11562 | 0.9983                  |
| Venus          | Hedelfingen      | Windsor          | 11475     | 31       | 11506 | 0.9973                  |
| Santina        | Stella           | Summit           | 11205     | 339      | 11544 | 0.9706                  |
| Santina_dup01  | Stella           | Summit           | 11102     | 350      | 11452 | 0.9694                  |

Name child

Name Parent 1

Name Parent 2

Number genotype calls without PC error

Proportion genotype calls with PPC error

Number genotype calls with PPC error



**RosBREED**  
DISEASE RESISTANCE × HORTICULTURAL QUALITY

# Finding new P(P)C relationships

1. Open ASSIsT's ".gtypes" output in Excel

6+9K v2\_gtypes.csv - Excel

2. Ensure genotypic data aligns with individuals' ID

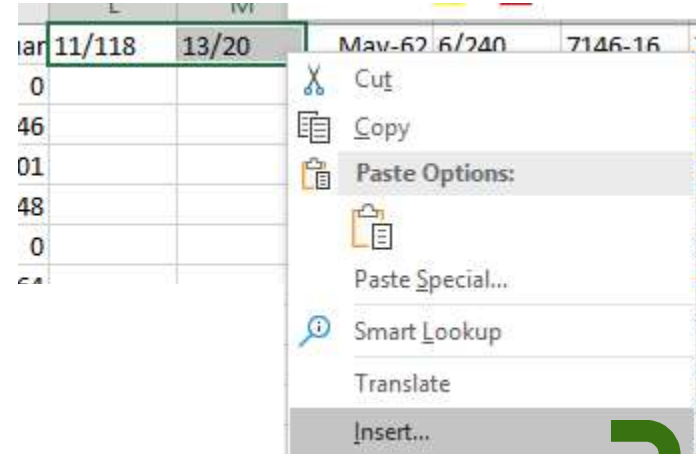

3. Copy and transpose data so that individuals are in rows and markers in columns

|         | B                   | C          | D          | E          | F          | G          |
|---------|---------------------|------------|------------|------------|------------|------------|
|         | RosBREED scaffold_1 | scaffold_1 | scaffold_1 | scaffold_1 | scaffold_1 | scaffold_1 |
| 13/20   | AA                  | AA         | AA         | AA         | GG         | AA         |
| May-62  | AA                  | AA         | AA         | AA         | GG         | AA         |
| 6/240   | AG                  | AA         | AA         | AA         | GG         | AA         |
| 7146-16 | AA                  | AG         | AG         | AG         | AG         | AC         |
| 7147-1  | GG                  | AG         | AG         | AG         | AG         | AA         |

Insert

Insert

- Shift cells right
- Shift cells down
- Entire row
- Entire column

OK Cancel



# Finding new P(P)C relationships

4. Bring in pedigree information for all individuals (parents do not have to be included in data set)

5. Set missing parents to “-”

6. Use “Ind”, “Parent1” and “Parent2” as column headers

| Ind    | Parent1 | Parent2 | RosE |
|--------|---------|---------|------|
| 11/118 |         |         | AA   |
| 13/20  |         |         | AA   |

7. Save file as “.csv” in same folder as “Parent Check” R script (Suppl. Document 2)

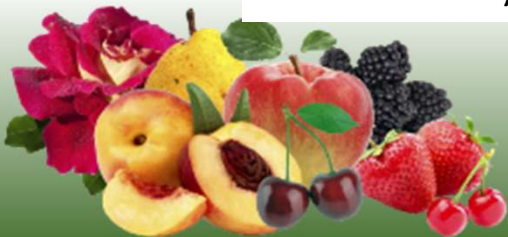

**RosBREED**  
DISEASE RESISTANCE × HORTICULTURAL QUALITY

# Finding new P(P)C relationships

8. Load libraries in R

```
library(stringr)  
library(svmisc)
```

9. Define functions in R by running them

```
##Functions  
AdjustMV <- function(GTData){  
  
CheckParErr <- function(GenotypeIndPar){  
  
CheckParParErr <- function(GenotypeIndParPar){  
  
CheckPar <- function(GenotypesIndParPar){  
  
FindParGT <- function(IndName, Genotypes){  
  
CheckParAll <- function(IndToCheck, ChrReport=NULL){  
  
FindPosPar <- function(IndName, GTData, treshold){  
  
FindPosParComb <- function(GTData, tresholdPE=0, tresholdPPE=0){
```

Run

10. Set working directory to source file location

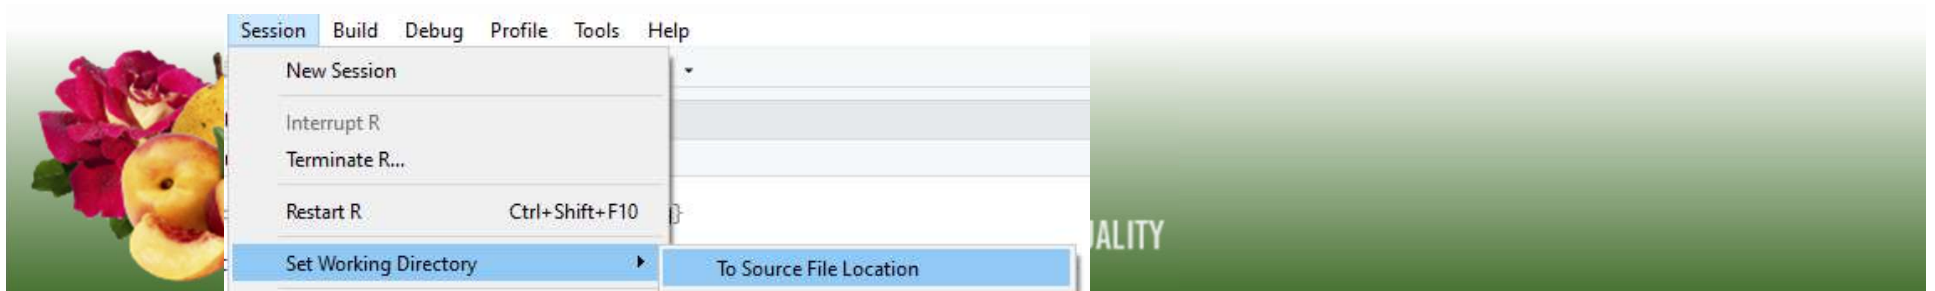

# Finding new P(P)C relationships

11. Define:

- Possible Alleles under AlleleList
  - \$ or \$\$ does not work for null alleles
- Characters used for missing genotypes under “MissGT”
- Characters used for missing alleleles under “MissAllele”

```
AlleleList <- c("A","B","C","null", "G", "T")  
MissGT <- c("NC","00", "--")  
MissAllele <-c("N","0","-")
```

12. Provide filename and load into R

```
## Load data files  
GenotypeData <- as.data.frame(read.csv(file="sweet_cherry_6+9K.csv", head=T, sep="," , stringsAsFactors=F))
```

13. Run “FindPosParComb”

Loaded data file

Threshold to accept PC relationship

Threshold to accept PPC relationship

```
> FindPosParComb(GenotypeData, tresholdPE = 70, tresholdPPE = 100)  
[1] "Starting step 1 of 3"  
[1] "Starting step 2 of 3"  
Progress: 1 on 40
```

3 steps:

- Identify possible mothers for ind. with missing mothers
- Identify possible fathers for ind. with missing fathers
- Identify parents for ind. with both parents missing

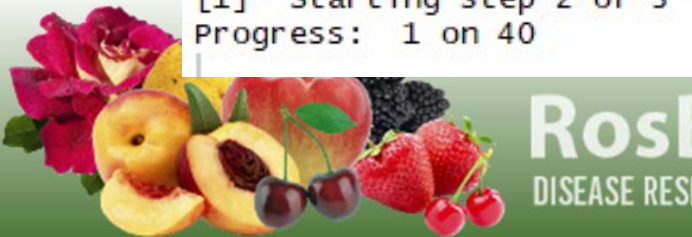

# Checking and finding grandparent-grandchild relationships

- Excel - Suppl file 1 from van de Weg et al. (2018)
  - If offspring is 'AB' and
    - 1 known parent is 'AA' OR
    - Two known grandparents through single parent are both 'AA'
  - Then: one unknown grandparent cannot be 'AA'
    - Minimize 'AA' calls gives indication of possible grandparent
    - For any 'AA' in putative grandparent, second unknown grandparent cannot be 'AA'
  - Also true for 'AB' in individual and 'BB' in known parents/grandparents

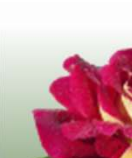

# van de Weg et al. (2018) method

1. Filter individual for AB

2. Filter parent 1 for AA

3. Parent 2 should have 0 AA

The image shows a multi-step data filtering process in a software interface. The interface includes a table of individuals and their parents, a filter menu, and a genotype counts table.

**Table 1: Individual and Parent Information**

| Individual | Enterprise | Individual | Enterprise |
|------------|------------|------------|------------|
| 1661-2     | McIntosh   | 1661-2     | McIntosh   |
| Coop-7     | PRI1661-2  | Coop-7     | PRI1612-1  |

**Table 2: Genotype Counts**

| Genotype | Count |
|----------|-------|
| A B+B B  | 481   |
| AA       | 0     |
| AB       | 306   |
| B B      | 175   |

**Table 3: Individual and Parent Information (Detailed)**

| Individual | Enterprise | Mother    | Father  |
|------------|------------|-----------|---------|
| Coop-7     | PRI1661-2  | PRI1018-9 | PRI1036 |

The interface also shows a filter menu with the following options:

- Sort A to Z
- Sort Z to A
- Sort by Color
- Clear Filter From "(Column I)"
- Filter by Color
- Text Filters
- Search
- (Select All)
- AA
- AB
- BB



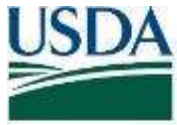

United States  
Department of  
Agriculture

National Institute  
of Food and  
Agriculture

# Curating remaining Mendelian-inconsistent errors

## RosBREED

DISEASE  
RESISTANCE

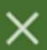

HORTICULTURAL  
QUALITY



SUPERIOR  
CULTIVARS





United States  
Department of  
Agriculture

National Institute  
of Food and  
Agriculture

# FlexQTL Data Prepper

## RosBREED

DISEASE  
RESISTANCE



HORTICULTURAL  
QUALITY

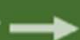

SUPERIOR  
CULTIVARS



# FlexQTL Data Prepper

- FlexQTL Data Prepper
  - Requires 3 input files
    - Marker file
      - Adjusted ASSIsT output file
    - Pedigree file
      - Adjusted ASSIsT input file
    - Data file
      - Generated by ASSIsT



**RosBREED**  
DISEASE RESISTANCE × HORTICULTURAL QUALITY

# FlexQTL Data Prepper

## Creating 1st input file (Marker file)

1. Create a three-column file:

- 1<sup>st</sup> column has the SNP's name/SNP's ID
- 2<sup>nd</sup> column has the chromosome (numerical)
- 3<sup>rd</sup> column has the genetic position (cM))
- Header row should be "MarkerId", "Group", "Position"
- Save as ".csv" file

\*Start from "...\_plink\_in.map" ASSIsT output file

\*Change header row

\*Change physical position to genetic position if needed

6+9Kv2\_plink\_in.map

6+9Kv5\_map.csv

|                          | A | B     | C        |
|--------------------------|---|-------|----------|
| MarkerId                 |   | Group | Position |
| RosBREED_snp_tart_1_0021 |   | 1     | 0        |
| scaffold_1:425480        |   | 1     | 3.62     |
| scaffold_1:427005        |   | 1     | 3.64     |
| scaffold_1:427260        |   | 1     | 3.65     |
| scaffold_1:429080        |   | 1     | 3.68     |
| scaffold_1:433354        |   | 1     | 3.75     |
| RosCOS1201-071_snp_swee  |   | 1     | 4.04     |
| scaffold_1:459954        |   | 1     | 4.2      |

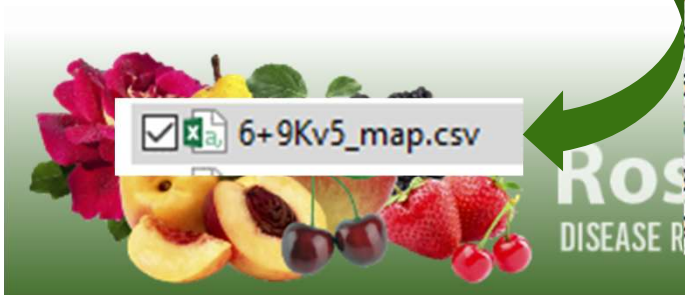

Ros  
DISEASE R

# FlexQTL Data Prepper

## Creating 2nd input file (Pedigree file)

2. Create a three-column file:

- 1<sup>st</sup> column has the individual's name
- 2<sup>nd</sup> column has the female parent
- 3<sup>rd</sup> column has the male parent
- Header row should be "Name", "Parent1", "Parent2"
- Save as ".csv" file

\*Start from ASSIST pedigree input file

\*Change header row

| A               | B              | C               |
|-----------------|----------------|-----------------|
| Name            | Parent1        | Parent2         |
| Abundance       | Napoleon       |                 |
| BlackRepublican | Napoleon       | BlackTartarian  |
| EmperorFrancis  |                |                 |
| Gil-Peck        | Napoleon       | Giant           |
| Hedelfingen     |                |                 |
| Kordia          | Schneiders     |                 |
| Lambert         | Napoleon       | Blackheart      |
| Summit          | Van            |                 |
| Sunburst        | Summit         |                 |
| Van             | EmpressEugenie | BlackRepublican |

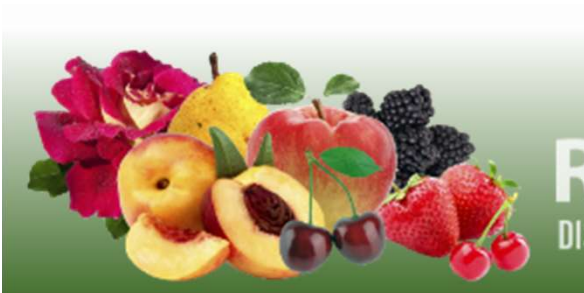



# FlexQTL Data Prepper

## Creating 3rd input file (Data file)

3. Adjust "...\_FQ\_DataPrepper.txt" file format from ".txt" to ".csv"

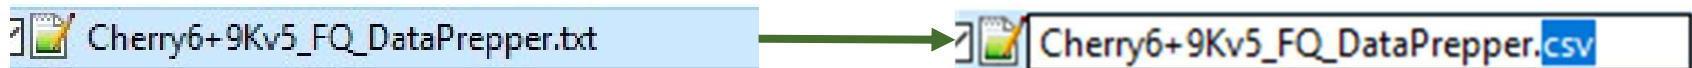

### Note:

If file format extension is not visible, enable it under the "View Tab" in the file's folder

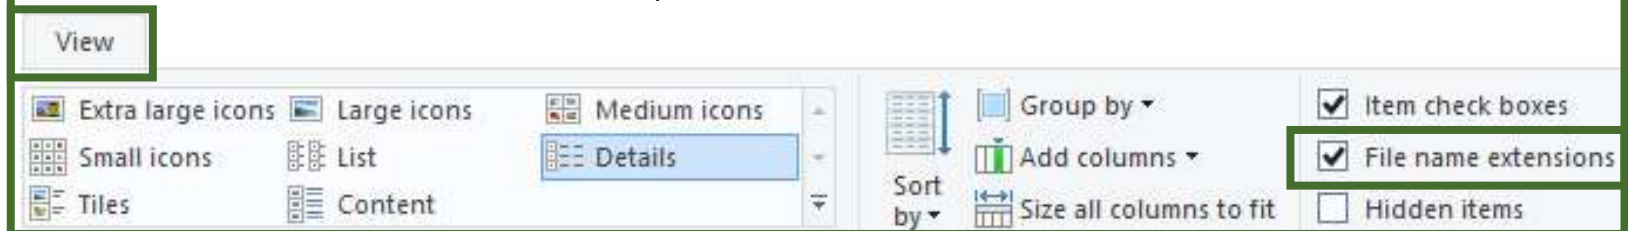

4. Open "...\_FQ\_DataPrepper.txt" file in Excel



**RosBREED**  
DISEASE RESISTANCE × HORTICULTURAL QUALITY

# FlexQTL Data Prepper

5. Adjust header row so it matches genotypic data

| SNPId      | -  | -- | Abundanc | Ambrunes | Benton | Bing | Walpurgis | WhiteGol | Windsor | YelGlass |
|------------|----|----|----------|----------|--------|------|-----------|----------|---------|----------|
| scaffold_1 | AA | AA | AA       | AA       | AA     | AA   | AA        | AA       |         |          |
| RosBREED   | AA | AA | AA       | AA       | AA     | AA   | AA        | AA       |         |          |
| S1_54448   | AA | AA | AA       | AA       | AA     | AA   | AA        | AA       |         |          |
| s7_888812  | GG | GG | GG       | GG       | GG     | GG   | GG        | GG       |         |          |
| scaffold_1 | GG | GG | GG       | GG       | GG     | GG   | GG        | GG       |         |          |

6. Change cell A1 to "ID"

7. Save file

| ID         | Abundanc | Ambrunes | Benton | Bing |
|------------|----------|----------|--------|------|
| scaffold_1 | AA       | AA       | AA     | AA   |
| RosBREED   | AA       | AA       | AA     | AA   |
| S1_54448   | AA       | AA       | AA     | AA   |
| s7_888812  | GG       | GG       | GG     | GG   |
| scaffold_1 | GG       | GG       | GG     | GG   |

# FlexQTL Data Prepper

8. Open FlexQTLDataPrepper.exe

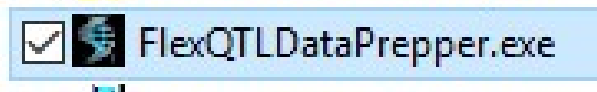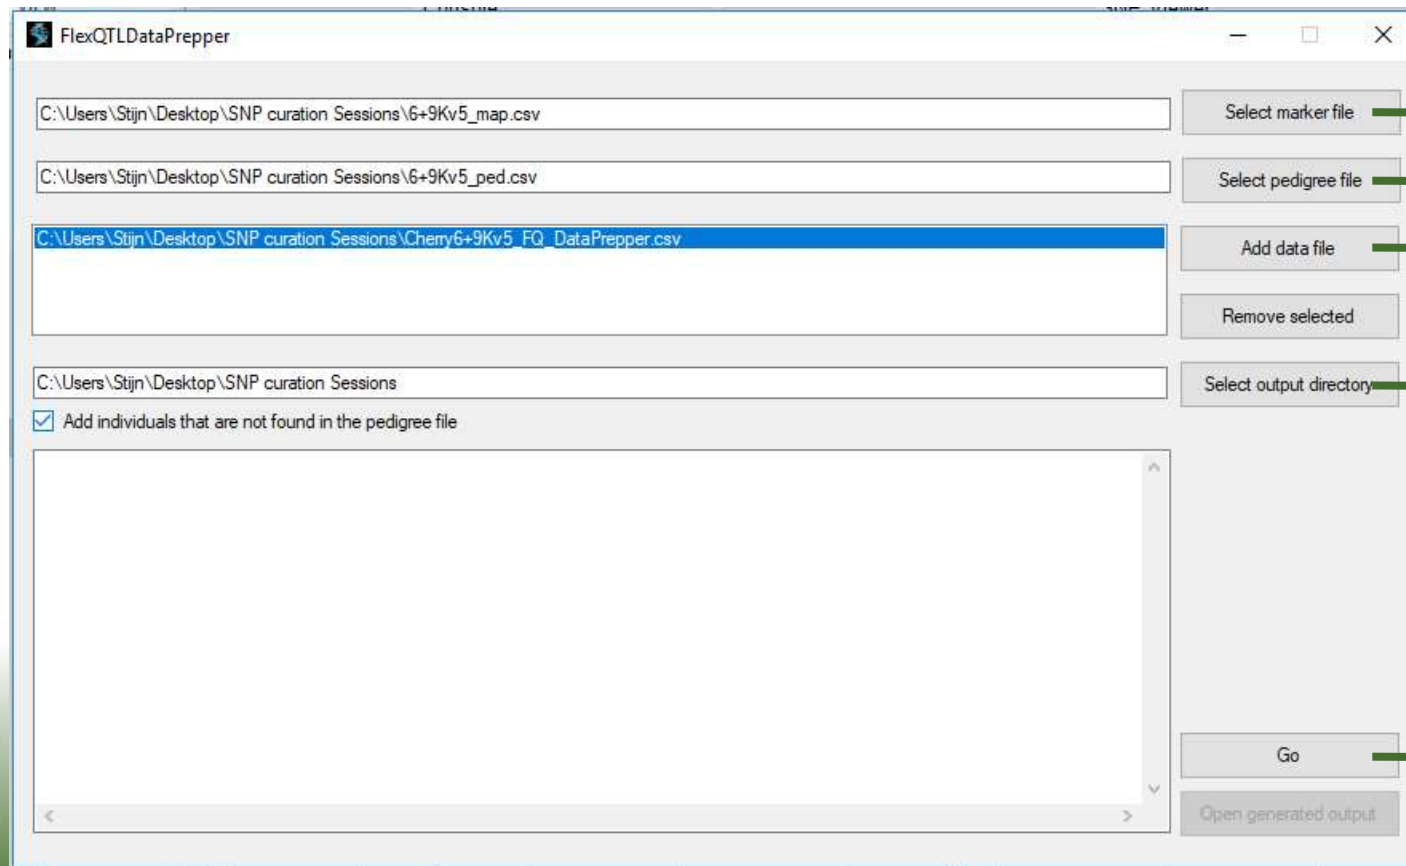

- 9. Load marker file
- 10. Load pedigree file
- 11. Load data file
- 12. Choose output directory
- 13. Select this option
- 14. Press 'Go'



United States  
Department of  
Agriculture

National Institute  
of Food and  
Agriculture

# FlexQTL™ Input files

## RosBREED

DISEASE  
RESISTANCE

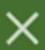

HORTICULTURAL  
QUALITY



SUPERIOR  
CULTIVARS

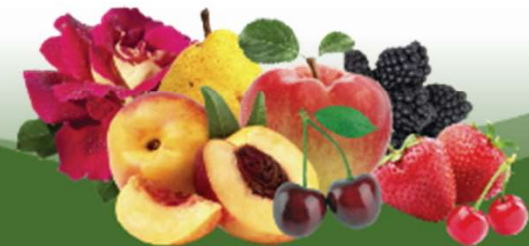

# FlexQTL™ input files

- Three files
  - Data file (.dat)
  - Map file (.map)
  - Parameter file (.par)
- Text-based files
- Everything after “;” will be ignored
  - Easy excluding of rows in file



**RosBREED**  
DISEASE RESISTANCE × HORTICULTURAL QUALITY



# FlexQTL™ input files

- Data file (.dat file)
  - No header needed (if added, start with “;”)
  - Column 1: Population
  - Column 2: Individual
  - Column 3: Parent 1
  - Column 4: Parent 2
    - Both parents needed (or none)
    - Use dummy individuals when only one parent is available
  - Column 5 – X: nuisance variables
  - Columns X+1 – Y: Phenotypic variables
  - Columns Y+1 – End: Genotypic data
    - Two columns per marker
    - One column per marker with space(s) between alleles

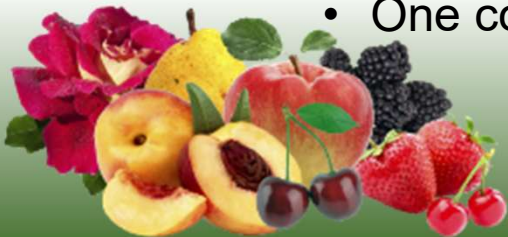

**RosBREED**  
DISEASE RESISTANCE × HORTICULTURAL QUALITY

# FlexQTL™ input files

- Map file (.map)
  - Column 1: marker name
  - Column 2: genetic position within LG
- Each LG starts with “group X”
  - X is LG number
- Identical number of markers needed as in data file



**RosBREED**  
DISEASE RESISTANCE × HORTICULTURAL QUALITY

# FlexQTL™ input files

- Parameter file (.par)
  - Always called “flexqtl.par”
  - Defines parameters for FlexQTL
    - Some are adjusted automatically through Visual FlexQTL (see further)
    - Some can be adjusted within FlexQTL
    - Need to be “correct” when running FlexQTL independently from Visual FlexQTL
      - E.g. on Linux



**RosBREED**  
DISEASE RESISTANCE × HORTICULTURAL QUALITY

# FlexQTL™ input files

- FlexQTL Data Prepper output needs additional adjustments
  - Parents without genotype data need to be added
    - Every individual in pedigree needs a data row for FlexQTL
  - Individuals with only one known parent need a second dummy parent
    - FlexQTL only accepts no or 2 parents known



**RosBREED**  
DISEASE RESISTANCE × HORTICULTURAL QUALITY

# FlexQTL™ input files

## Adjusting FlexQTLDataPrepper file to create 1st FlexQTL input file (data file)

1. Open “.csv” file generated by FlexQTLDataPrepper

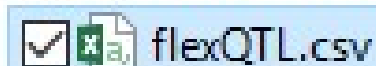

2. Find individuals with only one parent known/given and add a second ‘dummy’ parent

-Use “M\_[Individual’s name]” for unknown mother

-Use “F\_[Individual’s name]” for unknown father

-Use “UP\_[Individual’s name]” if unclear whether known parent is mother or father

|             | B | C        | D           |     |
|-------------|---|----------|-------------|-----|
| Individual  |   | Parent1  | Parent2     | Ro  |
| 1 Abundance |   | Napoleon | F_Abundance | A C |
| 1 Summit    |   | Van      | F_Summit    | A A |
| 1 Sunburst  |   | Summit   | F_Sunburst  | A A |

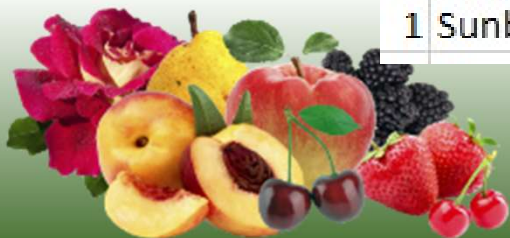

**RosBREED**  
DISEASE RESISTANCE × HORTICULTURAL QUALITY



# FlexQTL™ input files

3. Open “.csv” file generated by FlexQTLDataPrepper

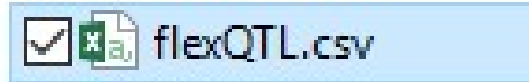

4. Copy both parental columns (columns C and D) to a new sheet

|   | A        | B                 | C        | D              |     |
|---|----------|-------------------|----------|----------------|-----|
| 1 | ;BaseCoh | Individual        | Parent1  | Parent2        | R   |
| 2 |          | 1 Abundance       | Napoleon | F_Abundance    | A   |
| 3 |          | 1 Ambrunes        |          | 0              | 0 G |
| 4 |          | 1 BlackRepublican | Napoleon | BlackTartarian | A   |
| 5 |          | 1 EmperorFrancis  |          | 0              | 0 A |
| 5 |          | 1 Gil-Peck        | Napoleon | Giant          | A   |

5. Copy “Parent 2” column below “Parent 1” column

|    | A              |
|----|----------------|
| 45 | EE             |
| 46 | Rainier        |
| 47 | Rainier        |
| 48 | F_Abundance    |
| 49 | 0              |
| 50 | BlackTartarian |

6. Remove duplicates\* from combined column  
\*found under “data” tab in Excel

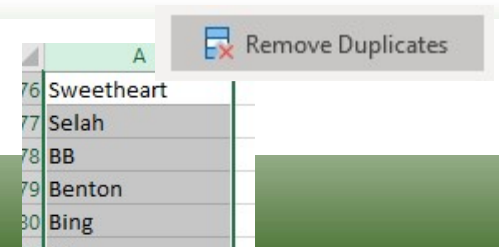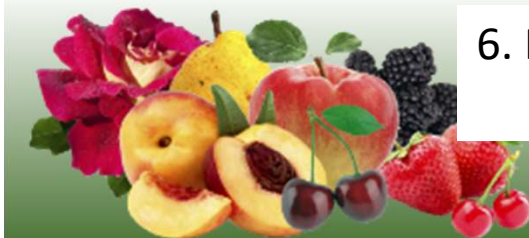

**CROSBREED**  
DISEASE RESISTANCE × HORTICULTURAL QUALITY

# FlexQTL™ input files

7. Count how often each parent is in datafile:

use “COUNTIF” function

Range is “Individual” column (column B) of original sheet

Criteria is parent to be checked (from created column in new sheet)

| A           | B                               | C | D |
|-------------|---------------------------------|---|---|
| Ambrunes    | =COUNTIF(flexQTL!B:B,Sheet1!A1) |   |   |
| BB          | COUNTIF(range, criteria)        |   |   |
| BedfordProl | 0                               |   |   |
| Benton      | 1                               |   |   |
| Bertiolle   | 0                               |   |   |
| Bing        | 1                               |   |   |
| BlackBeauty | 1                               |   |   |

8. Filter for individuals not in the data file (count = 0)

|                |   |   |
|----------------|---|---|
| Ambrunes       |   | ▼ |
| BedfordProl    | 0 |   |
| Bertiolle      | 0 |   |
| Cristobalina   | 0 |   |
| EmpressEugenie | 0 |   |



**R**  
DISEASE RESISTANCE × HORTICULTURAL QUALITY

# FlexQTL™ input files

9. Copy parents not in data file at the bottom of the data file

|    | A | B              | C        | D        | E   |     |
|----|---|----------------|----------|----------|-----|-----|
| 00 | 1 | Ulster         | Napoleon | Gil-Peck | A A | A G |
| 01 |   | BedfordProl    |          |          |     |     |
| 02 |   | Bertiolle      |          |          |     |     |
| 03 |   | Cristobalina   |          |          |     |     |
| 04 |   | EmpressEugenie |          |          |     |     |

| A              | B |
|----------------|---|
| Ambrunes       |   |
| BedfordProl    | 0 |
| Bertiolle      | 0 |
| Cristobalina   | 0 |
| EmpressEugenie | 0 |

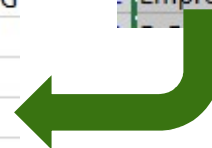

10. Fill in “Population” column (Column A), “Pedigree info” (Column C and D), and Genotypic data columns (Column E onwards) of added parents

-”0” for unknown pedigree

-Make sure newly-added pedigree info is also in data set

-“- -” for genotypic data

|    | A | B              | C        | D        | E   | F   | G   | H   | I   |
|----|---|----------------|----------|----------|-----|-----|-----|-----|-----|
| 00 | 1 | Ulster         | Napoleon | Gil-Peck | A A | A G | A G | A G | A G |
|    | 1 | BedfordProl    | 0        | 0        | --  | --  | --  | --  | --  |
|    | 1 | Bertiolle      | 0        | 0        | --  | --  | --  | --  | --  |
|    | 1 | Cristobalina   | 0        | 0        | --  | --  | --  | --  | --  |
|    | 1 | EmpressEugenie | 0        | 0        | --  | --  | --  | --  | --  |

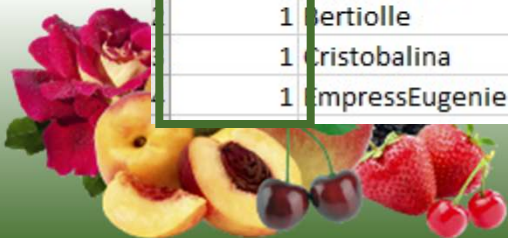

**RUSDREED**  
DISEASE RESISTANCE × HORTICULTURAL QUALITY

# FlexQTL™ input files

11. Add 2 columns between parentage information (Column C+D) and genotypic data (Column E)
12. Fill 1<sup>st</sup> new column (Column E) with “1”s  
\*Used as dummy nuisance column
13. Fill 2<sup>nd</sup> new column (Column F) with random numeric values  
\*Used as dummy phenotype column

| D            | E         | F                        | G           |
|--------------|-----------|--------------------------|-------------|
| parent2      | DummyNuis | DummyPheno               | RosBREED sc |
| Abundance    | 1         | =RANDBETWEEN(0,100)      | G           |
| 0            | 1         | RANDBETWEEN(bottom, top) | ;           |
| ackTartarian | 1         | 87                       | A G G       |

14. Copy full data sheet into text editor (e.g. Notepad++)
15. Save file in text format
16. Change new file's format extension from “.txt” to “.dat”



**RosBREED**  
DISEASE RESISTANCE × HORTICULTURAL QUALITY

# FlexQTL™ input files

## 2nd FlexQTL input file (map file)

17. Use flexQTL.map file generated by FlexQTL Data Prepper

## 3rd FlexQTL input file (parameter file)

18. Save Suppl. Table 4c as text file

\* “datafile”, “mapfile”, “indiC” and “nmrkrC” parameter settings will be updated automatically when loading files into Visual FlexQTL

19. Change file extension from “.txt” to “.par”

20. Change file name to “flexqtl”

**FlexQTL does not accept any other name!**



**RosBREED**  
DISEASE RESISTANCE × HORTICULTURAL QUALITY



United States  
Department of  
Agriculture

National Institute  
of Food and  
Agriculture

# Installing (Visual) FlexQTL™

## RosBREED

DISEASE  
RESISTANCE



HORTICULTURAL  
QUALITY



SUPERIOR  
CULTIVARS





# Installation

- Install Visual FlexQTL
  - Will also install FlexQTL
- Install following packages in R
  - Data.tables
  - Plyr
  - Lattice



**RosBREED**

DISEASE RESISTANCE × HORTICULTURAL QUALITY

# Installation

- Tools > Settings
  - General Tab
    - Where is Rscript.exe on pc
    - Where is flexqtl\_console.exe on pc
    - Where is postqtl\_console.exe on pc
    - Where can license be founds
      - Needs updating every year

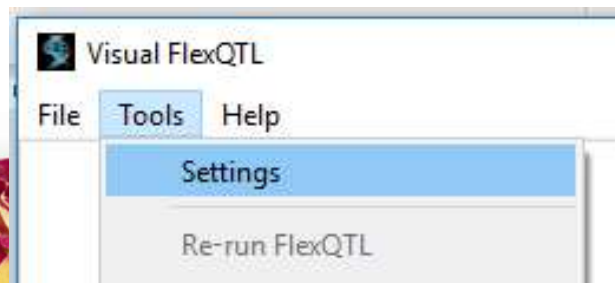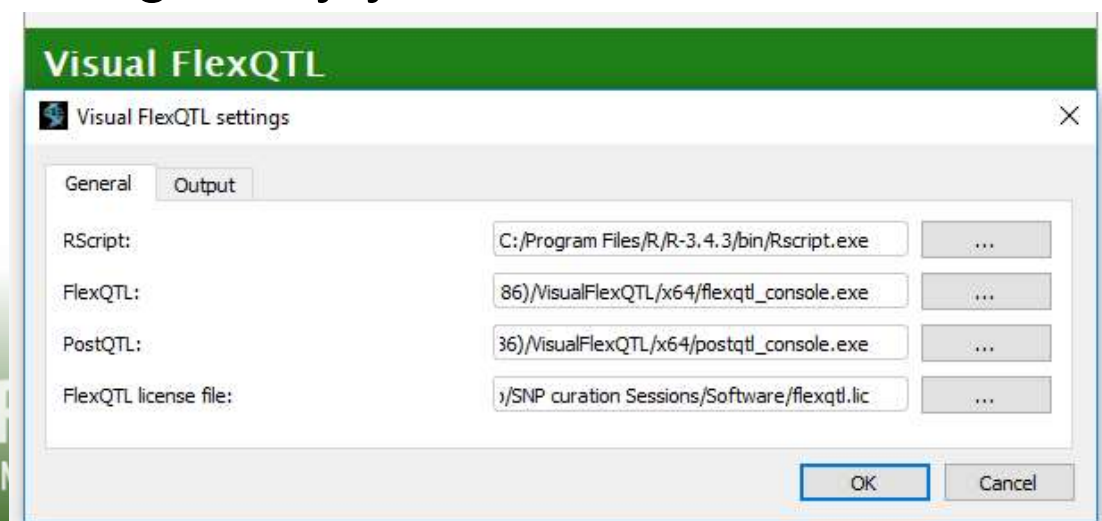

# Installation – Win8 or later

- Install Visual C++ Redistributable for Visual Studio 2012
  - <https://www.microsoft.com/en-us/download/details.aspx?id=30679>

Visual C++ Redistributable for Visual Studio 2012 Update 4

Download

Choose the download you want

File Name

VSU\_4\vc redistrib\_x64.exe

VSU\_4\vc redistrib\_x86.exe

VSU4\vc redistrib\_arm.exe

Most new pc  
need this one

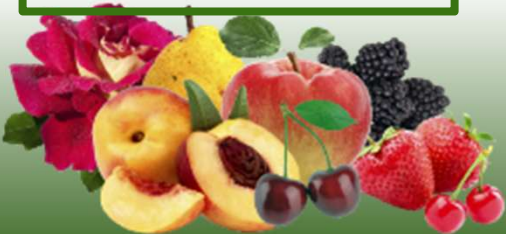

RosB  
DISEASE RESISTA



United States  
Department of  
Agriculture

National Institute  
of Food and  
Agriculture

# Finding Mendelian- inconsistent errors

## RosBREED

DISEASE  
RESISTANCE



HORTICULTURAL  
QUALITY



SUPERIOR  
CULTIVARS



# Creating project in Visual FlexQTL™

1. Open Visual FlexQTL™

2. Under “File”, choose “New Project”

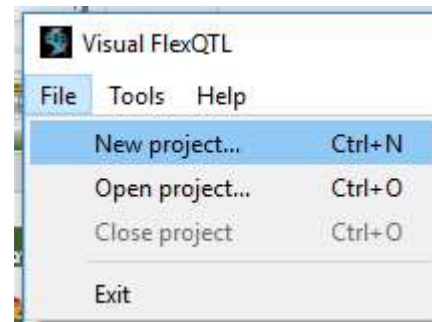

Create new project

## Create new project

To create a project, select a project name and specify the location of the project in your file system. If you want to create a project for an existing map and/or data file, then you can set these files to be imported into your project.

### Project name and location

Project name: 6+9K

Project location: C:/Users/Stijn/Desktop/SNP curation Sessions/FlexQTL

Project folder: sers/Stijn/Desktop/SNP curation Sessions/FlexQTL\6+9K

### Import data files

Parameter file: :sktop/SNP curation Sessions/FlexQTL/6+9kv5/flexqtl.par

Map file: :top/SNP curation Sessions/FlexQTL/6+9kv5/6+9Kv5.map

Data file: :ktop/SNP curation Sessions/FlexQTL/6+9kv5/6+9Kv5.dat

OK

Cancel

3. Choose name for project

4. Choose project directory

Filled in automatically

4. Load parameter file

5. Load map file

6. Load data file

6. Press “OK”

# Creating project in Visual FlexQTL™

1. Open Visual FlexQTL™

2. Under “File”, choose “New Project”

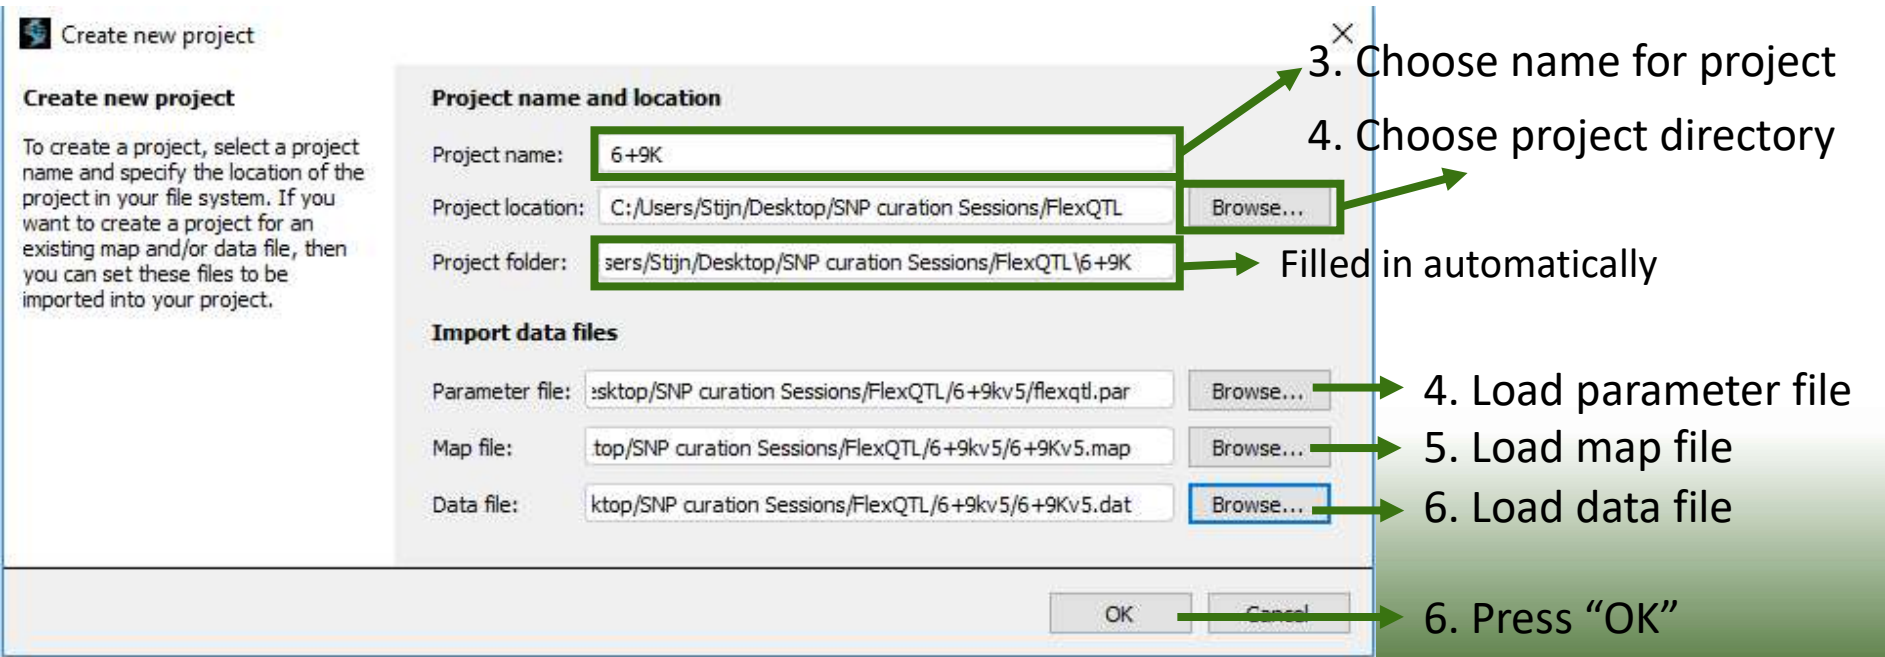A screenshot of the 'Create new project' dialog box in Visual FlexQTL. The dialog is titled 'Create new project' and contains the following fields and buttons:

- Project name and location:**
  - Project name: 6+9K (highlighted with a green box, with an arrow pointing to it from the annotation '3. Choose name for project')
  - Project location: C:/Users/Stijn/Desktop/SNP curation Sessions/FlexQTL (with a 'Browse...' button next to it, and an arrow pointing to it from the annotation '4. Choose project directory')
  - Project folder: sers/Stijn/Desktop/SNP curation Sessions/FlexQTL\6+9K (highlighted with a green box, with an arrow pointing to it from the annotation 'Filled in automatically')
- Import data files:**
  - Parameter file: :sktop/SNP curation Sessions/FlexQTL/6+9kv5/flexqtl.par (with a 'Browse...' button next to it, and an arrow pointing to it from the annotation '4. Load parameter file')
  - Map file: :top/SNP curation Sessions/FlexQTL/6+9kv5/6+9Kv5.map (with a 'Browse...' button next to it, and an arrow pointing to it from the annotation '5. Load map file')
  - Data file: :ktop/SNP curation Sessions/FlexQTL/6+9kv5/6+9Kv5.dat (with a 'Browse...' button next to it, and an arrow pointing to it from the annotation '6. Load data file')
- Buttons: 'OK' and 'Cancel' (with an arrow pointing to the 'OK' button from the annotation '6. Press "OK"')

3. Choose name for project

4. Choose project directory

Filled in automatically

4. Load parameter file

5. Load map file

6. Load data file

6. Press "OK"



# Checking parameter settings

7. Check parameter settings under the 'Settings' tab

8. Press "Save" if any values were changed

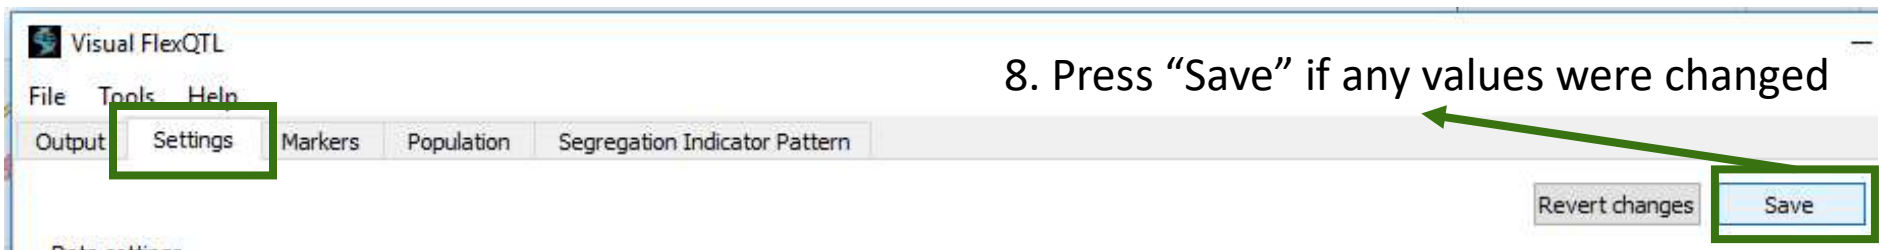

Allow marker loci segregation distortion:

Checked to allow for segregation distortion

Delete double recombinants:

Unchecked to keep genotypic data for single marker double recombinations

Create pedimap visualisation files:

"2" for an early stop; generates files for error checking but does not do full FlexQTL™ analysis (can take days)



**RosBREED**

DISEASE RESISTANCE × HORTICULTURAL QUALITY

# Running FlexQTL™

8. Run FlexQTL (Tools>Re-run FlexQTL)

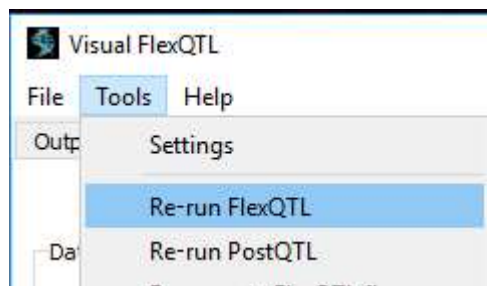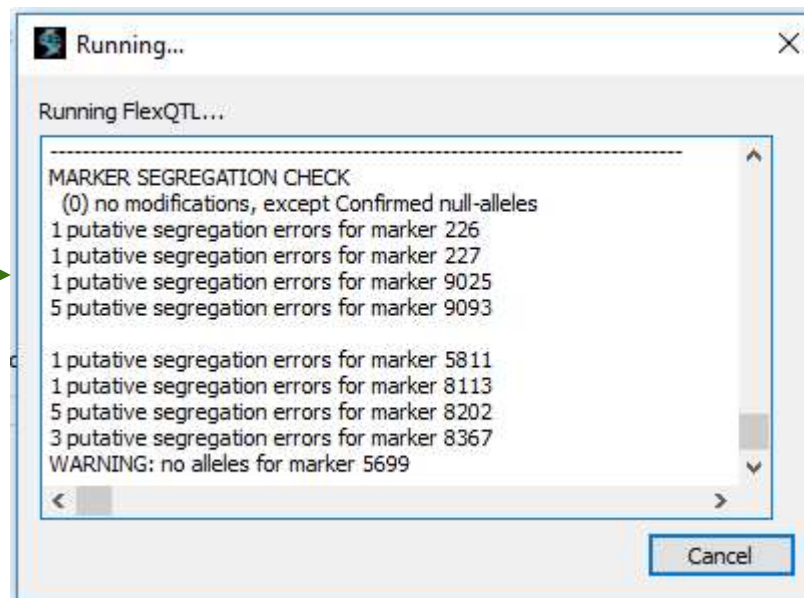

9. Once run, go to project directory and open “mconsistency.csv”

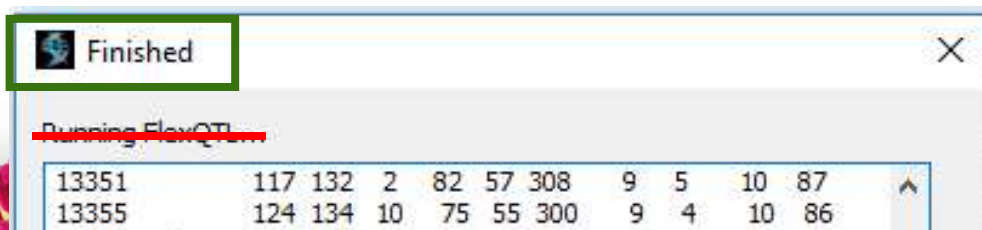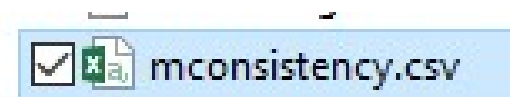

10. Save file in “.xls(x)” format

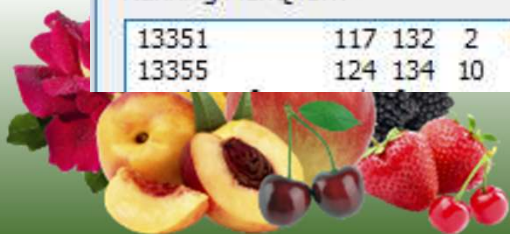

**RosBREED**  
DISEASE RESISTANCE × HORTICULTURAL QUALITY

# Mconsistency.csv

## Information found in mconsistency file (1)

| Code_Pec | Symbol | ShortNam | Description                          |
|----------|--------|----------|--------------------------------------|
| 0        | .      | OC       | observed & consistent                |
| 1        | &      | MA       | missing & augmented                  |
| 2        | }      | OEA      | observed & deleted error & augmented |
| 3        | ]      | pnuA     | putative null-allele & augmented     |
| 4        | ~      | pnuM     | putative null-allele & missing       |
| 5        | -      | IM       | incomplete & missing                 |
| 6        | /      | OpE      | observed & putative error            |
| 7        | {      | OE       | observed & deleted error             |
| 8        | [      | pnuE     | putative null-allele & error         |
| 9        | #      | ME       | missing & error                      |

Consistencies and errors reported by the mconsistency file

| marker position | SUM({[#) | {   | [ | #   | }   | /  | SUM(}/) | ~ |
|-----------------|----------|-----|---|-----|-----|----|---------|---|
| SUM({[#)        | 1180     |     |   |     |     |    |         |   |
| {               |          | 351 |   |     |     |    |         |   |
| [               |          |     | 0 |     |     |    |         |   |
| #               |          |     |   | 829 |     |    |         |   |
| }               |          |     |   |     | 484 |    |         |   |
| /               |          |     |   |     |     | 15 |         |   |
| SUM(}/)         |          |     |   |     |     |    | 499     |   |
| ~               |          |     |   |     |     |    |         | 0 |

Summary of errors found in data set

# Mconsistency.csv

## Information found in mconsistency file (2)

| position | SUM({[#] | { | [ | # | } | / | SUM({/) | ~ |
|----------|----------|---|---|---|---|---|---------|---|
| Napoleon | 0        | 0 | 0 | 0 | 0 | 0 | 0       | 0 |
| F_Abunda | 0        | 0 | 0 | 0 | 0 | 0 | 0       | 0 |
| Abundanc | 0        | 0 | 0 | 0 | 0 | 0 | 0       | 0 |
| Ambrunes | 2        | 2 | 0 | 0 | 6 | 0 | 6       | 0 |

Summary of errors found for each individual

Summary of errors found for each marker

| marker   | 4071 | 8853     | 8854     |
|----------|------|----------|----------|
| position | 100  | 100.0362 | 100.0364 |
| SUM({[#] | 1    | 1        | 0        |
| {        | 0    | 0        | 0        |
| [        | 0    | 0        | 0        |
| #        | 1    | 1        | 0        |
| }        | 0    | 0        | 0        |
| /        | 0    | 0        | 0        |
| SUM({/)  | 0    | 0        | 0        |
| ~        | 0    | 0        | 0        |

Observation (consistent genotype or erroneous genotype) for each individual and marker combination

| marker    | 4071 | 8853     | 8854     | 8855     |
|-----------|------|----------|----------|----------|
| position  | 100  | 100.0362 | 100.0364 | 100.0365 |
| Napoleon  | -    | &        | &        | &        |
| F_Abunda  | -    | -        | -        | -        |
| Abundanc  | .    | -        | -        | -        |
| Ambrunes  | .    | .        | -        | .        |
| Angela    | .    | .        | .        | .        |
| Blackhear | -    | -        | -        | -        |
| Lambert   | .    | .        | .        | .        |
| J12420    | -    | -        | -        | -        |
| Stella    | .    | .        | .        | .        |
| Morreau   | .    | .        | .        | .        |

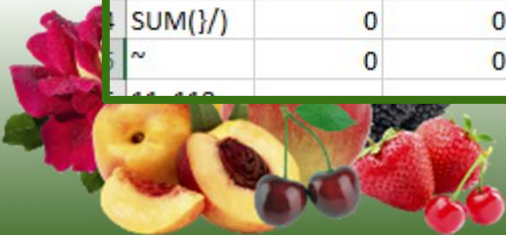

# Mconsistency.csv

11. Copy data from row 15 onward and all columns

|    |           |         |     |                 |     |     |    |         |      |          |   |
|----|-----------|---------|-----|-----------------|-----|-----|----|---------|------|----------|---|
| 13 | ;         | 9 #     | ME  | missing & error |     |     |    |         |      |          |   |
| 14 |           |         |     |                 |     |     |    |         |      |          |   |
| 15 | marker    |         |     |                 |     |     |    |         | 4071 | 8853     |   |
| 16 | position  |         |     |                 |     |     |    |         | 100  | 100.0362 |   |
| 17 |           | SUM({[# | {   | [               | #   | }   | /  | SUM(}/) | ~    |          |   |
| 18 | SUM({[#   | 1180    |     |                 |     |     |    |         |      | 1        | 1 |
| 19 | {         |         | 351 |                 |     |     |    |         |      | 0        | 0 |
| 20 | [         |         |     | 0               |     |     |    |         |      | 0        | 0 |
| 21 | #         |         |     |                 | 829 |     |    |         |      | 1        | 1 |
| 22 | }         |         |     |                 |     | 484 |    |         |      | 0        | 0 |
| 23 | /         |         |     |                 |     |     | 15 |         |      | 0        | 0 |
| 24 | SUM(}/)   |         |     |                 |     |     |    | 499     |      | 0        | 0 |
| 25 | ~         |         |     |                 |     |     |    |         | 0    | 0        | 0 |
| 26 | 11_118    | 0       | 0   | 0               | 0   | 0   | 0  | 0       | 0    | .        | . |
| 27 | 13_20     | 0       | 0   | 0               | 0   | 0   | 0  | 0       | 0    | .        | . |
| 28 | 5_62      | 0       | 0   | 0               | 0   | 0   | 0  | 0       | 0    | .        | . |
| 29 | 6_240     | 0       | 0   | 0               | 0   | 0   | 0  | 0       | 0    | .        | . |
| 30 | 99F_131RJ | 0       | 0   | 0               | 0   | 0   | 0  | 0       | 0    | .        | . |

12. Transpose copied data in new sheet

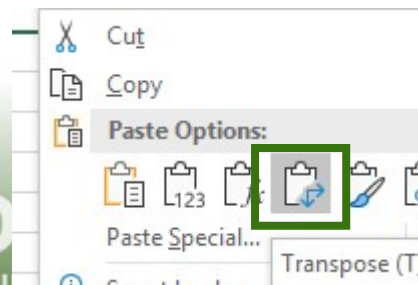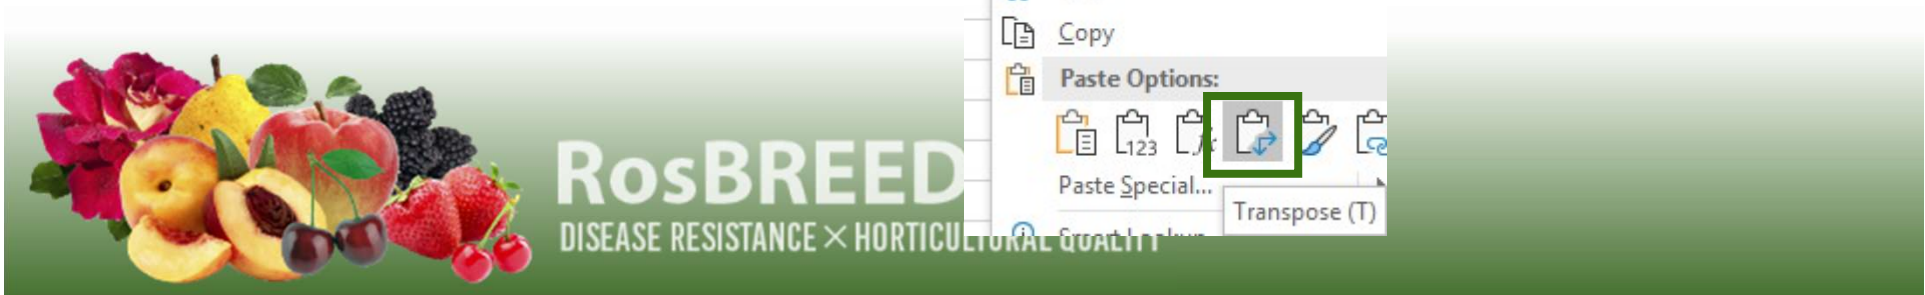



# Mconsistency.csv

13. Sum all errors for each marker in column C

| A      | B        | C            | D       | E | F | G | H | I | J       | K |    |
|--------|----------|--------------|---------|---|---|---|---|---|---------|---|----|
| marker | position |              | SUM({[# | { | [ | # | } | / | SUM(}/) | ~ | 11 |
|        |          | ~            |         |   |   |   |   |   |         | 0 |    |
| 4071   | 100      | =D10+J10+K10 |         | 0 | 0 | 1 | 0 | 0 | 0       | 0 | 0  |
| 8853   | 100.0362 | 1            | 1       | 0 | 0 | 1 | 0 | 0 | 0       | 0 | 0  |

14. Add filter and filter for markers with at least 1 error  
 \*optional: sort full data according to number of errors from high to low

15. Copy all data and transpose into new sheet  
 \*original mconsistency format but only markers with errors are kept

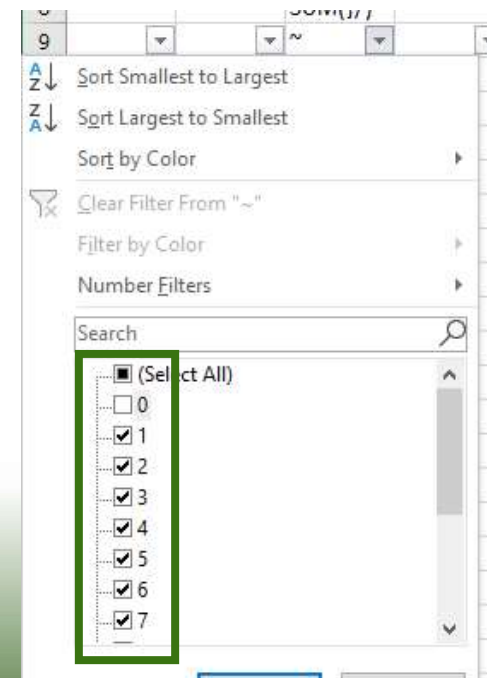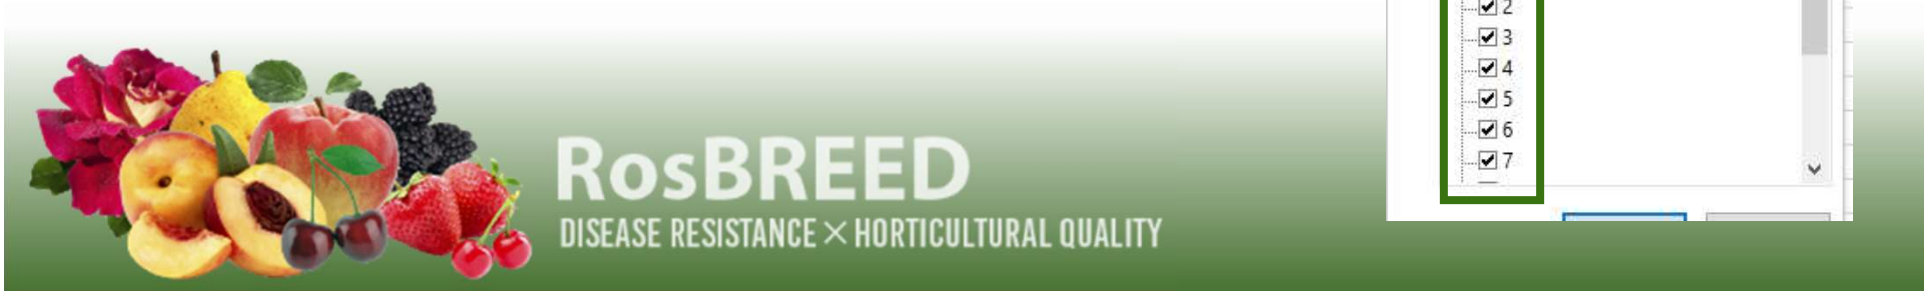



# Mconsistency.csv

16. Freeze panes so that summary for each marker and individual is locked

17. Add filter to last summary row

| A        | B          | C     | D | E       | F   | G  | H   | I | J    | K        |     |
|----------|------------|-------|---|---------|-----|----|-----|---|------|----------|-----|
| marker   |            |       |   |         |     |    |     |   | 4071 | 8853     |     |
| position |            |       |   |         |     |    |     |   | 100  | 100.0362 | 100 |
|          | SUM({[#] { | [ # } | / | SUM(}/) |     |    |     |   | 1    | 1        |     |
| SUM({[#] | 1180       |       |   |         |     |    |     |   | 1    | 1        |     |
| {        |            | 351   |   |         |     |    |     |   | 0    | 0        |     |
| [        |            |       | 0 |         |     |    |     |   | 0    | 0        |     |
| #        |            |       |   | 829     |     |    |     |   | 1    | 1        |     |
| }        |            |       |   |         | 484 |    |     |   | 0    | 0        |     |
| /        |            |       |   |         |     | 15 |     |   | 0    | 0        |     |
| SUM(}/)  |            |       |   |         |     |    | 199 |   | 0    | 0        |     |
| 1        | ~          |       |   |         |     |    |     |   |      |          |     |
| 2        | 11_118     | 0     | 0 | 0       | 0   | 0  | 0   | 0 | 0    | 0        |     |
| 3        | 13_20      | 0     | 0 | 0       | 0   | 0  | 0   | 0 | 0    | 0        |     |
| 4        | 5_62       | 0     | 0 | 0       | 0   | 0  | 0   | 0 | 0    | 0        |     |

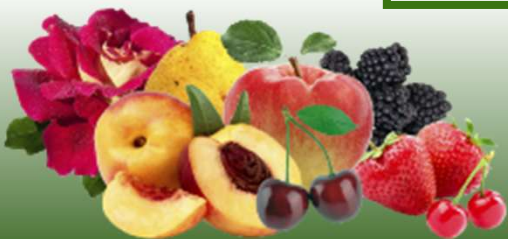

# Mconsistency.csv

18. For each marker, filter for characters that are associated with an error to find which individuals are causing an error in column A

|    | A         | B          | C     | D | E       | F   | G  | H   | I | AEJ      |
|----|-----------|------------|-------|---|---------|-----|----|-----|---|----------|
| 1  | marker    |            |       |   |         |     |    |     |   | 2977     |
| 2  | position  |            |       |   |         |     |    |     |   | 600.4256 |
| 3  |           | SUM({{#} { | [ # } | / | SUM({/) | ~   |    |     |   | 11       |
| 4  | SUM({{#}  | 1180       |       |   |         |     |    |     |   | 3        |
| 5  | {         |            | 351   |   |         |     |    |     |   | 3        |
| 6  | [         |            |       | 0 |         |     |    |     |   | 0        |
| 7  | #         |            |       |   | 829     |     |    |     |   | 0        |
| 8  | }         |            |       |   |         | 484 |    |     |   | 7        |
| 9  | /         |            |       |   |         |     | 15 |     |   | 1        |
| 10 | SUM({/)   |            |       |   |         |     |    | 499 |   | 8        |
| 11 | %         |            |       |   |         |     |    |     |   |          |
| 12 |           |            |       |   |         |     |    |     |   |          |
| 13 | BlackRepu | 1          | 1     | 0 | 0       | 0   | 0  | 0   | 0 | {        |
| 14 | Lapins    | 3          | 3     | 0 | 0       | 7   | 0  | 7   | 0 | }        |
| 15 | Rainier   | 17         | 17    | 0 | 0       | 15  | 0  | 15  | 0 | }        |
| 16 | Regina    | 0          | 0     | 0 | 0       | 12  | 0  | 12  | 0 | }        |
| 17 | Selah     | 4          | 4     | 0 | 0       | 8   | 0  | 8   | 0 | {        |
| 18 | PMR-1     | 0          | 0     | 0 | 0       | 6   | 1  | 7   | 0 | /        |
| 19 | Cowiche   | 32         | 32    | 0 | 0       | 56  | 0  | 56  | 0 | {        |
| 20 | FR010T000 | 0          | 0     | 0 | 0       | 1   | 0  | 1   | 0 | }        |

## Error-associated characters

| cc | Symbol | Shortname | Description                          |
|----|--------|-----------|--------------------------------------|
| 2  | }      | OEA       | observed & deleted error & augmented |
| 6  | /      | OpE       | observed & putative error            |
| 7  | {      | OE        | observed & deleted error             |
| 8  | [      | pnuE      | putative null-allele & error         |
| 9  | #      | ME        | missing & error                      |

Filtered for error-associated characters

Individuals who caused an error for this marker

- \*Could also be their parents (or ancestors if parents have missing data)
- \*Could also be their offspring (very often the case)

# Resolving errors

19. Check genotypic data to find what is causing the issue

\*Note: sometimes imputed missing data is causing the issue

e.g. parental genotypic data is missing but grandparents are both “AA” -> parent is imputed as “AA” however individual is “BB” -> error reported

\*Note: In case of multiple parents/ancestors with missing data that prevented earlier pedigree checking, pedigree could still be incorrect

20. Check GenomeStudio® to:

- Ensure genotypic data matches
- Genotype clustering is correct (e.g. additional clusters or null alleles observed)
- Single individuals are assigned the correct genotype

Incorrect clustering

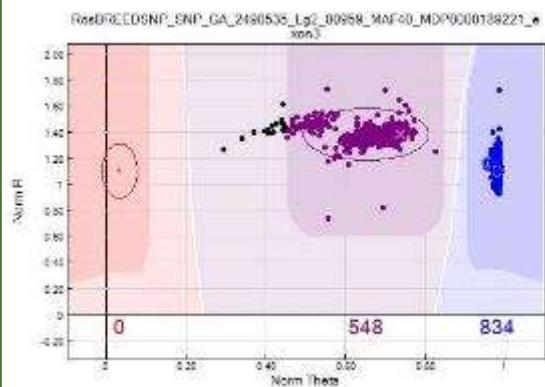

Incorrect clustering due to additional clusters

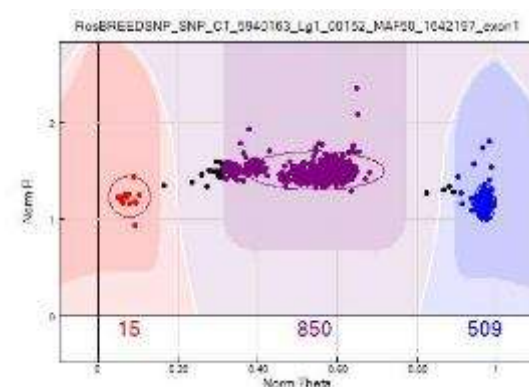

Incorrect clustering due to null alleles

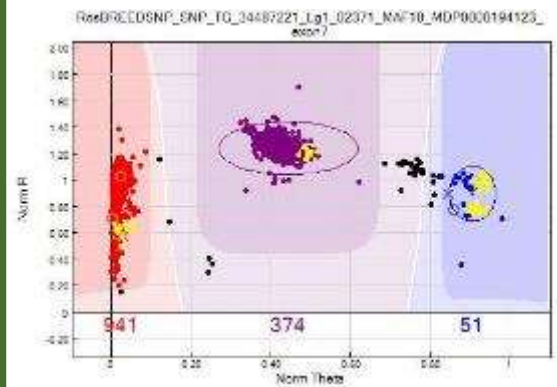

# Resolving errors

21. Update data file (pedigree or genotypic data)

\*Update map file if markers were removed from data set

22. Re-run FlexQTL™ and check mconsistency file to ensure errors are resolved

22. Repeat until no errors are reported

|    |          |         |   |   |   |   |   |         |   |     |
|----|----------|---------|---|---|---|---|---|---------|---|-----|
| 6  | position |         |   |   |   |   |   |         |   | 100 |
| 7  |          | SUM({[# | { | [ | # | } | / | SUM(}/) | ~ |     |
| 8  | SUM({[#  | 0       |   |   |   |   |   |         |   | 0   |
| 9  | {        |         | 0 |   |   |   |   |         |   | 0   |
| 10 | [        |         |   | 0 |   |   |   |         |   | 0   |
| 11 | #        |         |   |   | 0 |   |   |         |   | 0   |
| 12 | }        |         |   |   |   | 0 |   |         |   | 0   |
| 13 | /        |         |   |   |   |   | 0 |         |   | 0   |
| 14 | SUM(}/)  |         |   |   |   |   |   | 0       |   | 0   |
| 15 | ~        |         |   |   |   |   |   |         | 0 | 0   |

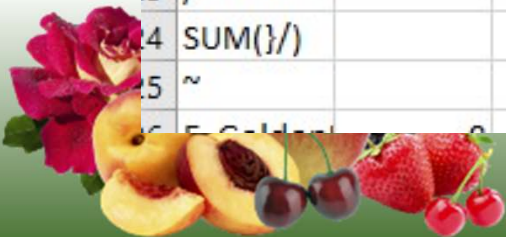



United States  
Department of  
Agriculture

National Institute  
of Food and  
Agriculture

# Finding Mendelian- consistent errors

## RosBREED

DISEASE  
RESISTANCE



HORTICULTURAL  
QUALITY



SUPERIOR  
CULTIVARS



# Finding double recombinations

1. Run FlexQTL™ with latest map and data file that did not lead to any reported errors
  - \*Parameter settings remain the same
2. Set interval for which double recombinations (DR) (Tools>Calculate>(Re-)Compute recombination sequences)
  - \*Default is all DR within 10 cM

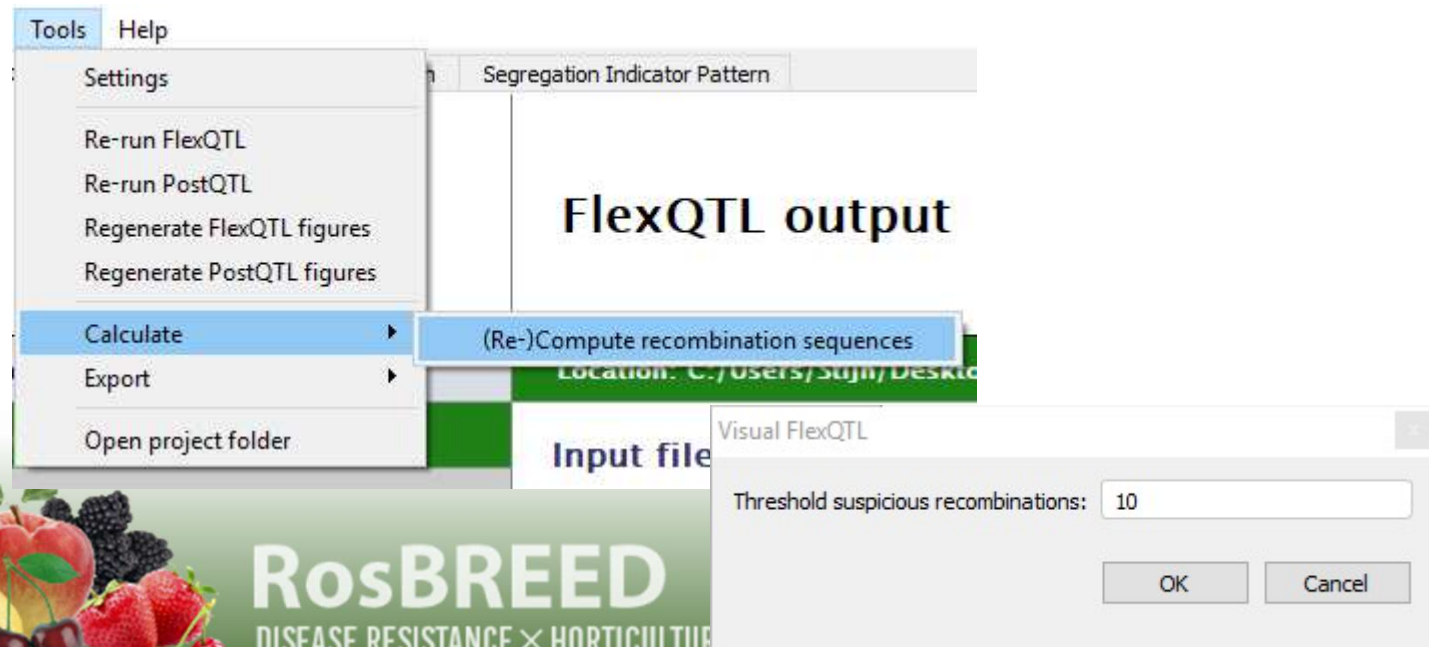



# Finding DR

3. Export all double recombinations within defined interval (Tools>Export>Export recombination sequences file; then select directory to save file in)

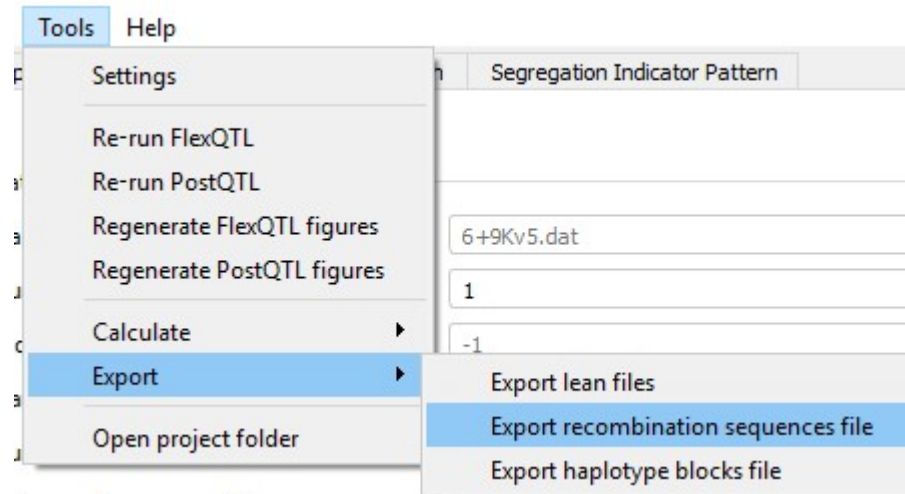

4. Open generated file called “DoubleRecombinations.csv”

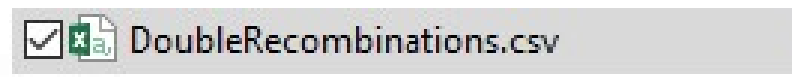

5. Save as “.xls(x)” format

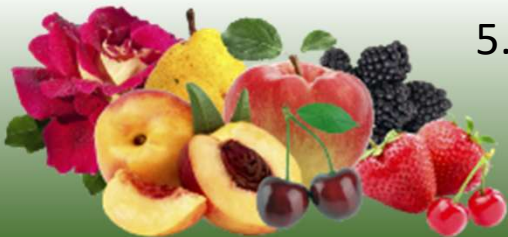

**RosBREED**  
DISEASE RESISTANCE × HORTICULTURAL QUALITY

# Finding DR

## Information found in DoubleRecombinations file

Individual in which DR is observed

How suspicious/unlikely is this DR

Chromosome on which DR is observed

Length of DR interval

|   | A          | B          | C       | D    | E    | F    | G    | H     | I     | J     | K     | L    | M         |
|---|------------|------------|---------|------|------|------|------|-------|-------|-------|-------|------|-----------|
| 1 | Individual | Chromosome | Homolog | M1   | M2   | M3   | M4   | P1    | P2    | P3    | P4    | R    | Suspicion |
| 2 | Abundance  | 1          | 0       | 8112 | 8202 | 8202 | 453  | 47.82 | 53.41 | 53.41 | 56.17 | 8.35 | 0.073106  |
| 3 | Abundance  | 1          | 0       | 8202 | 453  | 453  | 8255 | 53.41 | 56.17 | 56.17 | 57.31 | 3.9  | 1         |
| 4 | Abundance  | 1          | 0       | 509  | 8343 | 8359 | 8367 | 76.07 | 78.47 | 80.13 | 80.55 | 4.48 | 0.999835  |

Homolog on which DR is observed

0: Homolog coming from mother

1: Homolog coming from father

-M/P1: Last marker name(M)/position(P)  
before 1<sup>st</sup> recombination

-M/P2: First marker name(M)/position(P)  
after 1<sup>st</sup> recombination

-M/P3: Last marker name(M)/position(P)  
before 2<sup>nd</sup> recombination

-M/P4: First marker name(M)/position(P)  
after 2<sup>nd</sup> recombination

# Finding DR

- Sort file according to chromosome and position of DR
- Look first for regions with many DR
- Use 'Segregation Indicator Pattern' tab of Visual FlexQTL™ to visualize DR  
Use drop-down menu on top-right to choose "Recombination sequences (based on FlexQTL SIP)"

Visual FlexQTL

File Tools Help

Output Settings Markers Population Segregation Indicator Pattern

Threshold suspicious recombinations: 10

Marker scores

- Marker scores
- SIP (computed by FlexQTL)
- Recombination sequences (based on FlexQTL SIP)
- Parent indicator (computed by Visual FlexQTL)
- SIP (computed by Visual FlexQTL)

| # | Individual | Parent | Offspring | 1897 | 5444 | 4177 | 1964 |
|---|------------|--------|-----------|------|------|------|------|
|   |            |        |           | 0    | 0    | 0    | 0    |

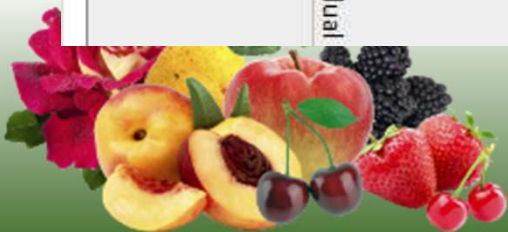

**RosBREED**  
DISEASE RESISTANCE × HORTICULTURAL QUALITY

# Investigating DR

## Information found under “Segregation Indicator Pattern” tab

Indicator of grandparental origin:

-0: Allele originates from mother of parent (grandmother; yellow)

-1: Allele originates from father of parent (grandfather; blue)

Recombination region (0-to-1 or 1-to-0 switch; orange)

Parent’s name

Individual’s name

DR region (0-to1-to-0 or 1-to-0-to-1 switches; red)

2 lines for each individual, one for each parent’s homolog

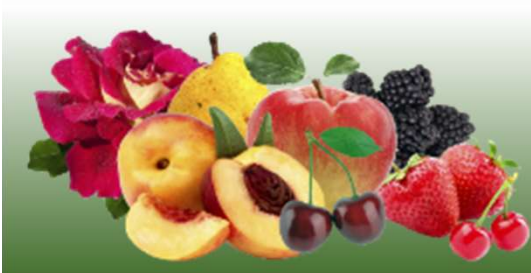

| Individual | Parent     | Offspring | 7093 | 5084 | 6503 | 5093 | 0100 | 0222 | 2213 | 5216 | 5307 | 8376 | 494 | 6723 | 2276 | 5407 | 5413 | 7239 |
|------------|------------|-----------|------|------|------|------|------|------|------|------|------|------|-----|------|------|------|------|------|
| 0415-0023  | Enterprise | 0         | s1   | -    | -    | -    | -    | s1   | s1   | -    | s1   | -    | -   | s1   | 1    | 1    | 1    | s1   |
| 0415-0024  | Honeycrisp | 0         | 0    | -    | -    | -    | -    | 0    | 0    | -    | 0    | -    | -   | 0    | -    | -    | -    | s0   |
| 0415-0024  | Enterprise | 0         | 0    | -    | -    | -    | -    | 0    | 0    | -    | 0    | -    | -   | 0    | 1    | 1    | 1    | s1   |
| 0415-0025  | Honeycrisp | 0         | s1   | -    | -    | -    | -    | s1   | s1   | -    | s1   | -    | -   | s1   | -    | -    | -    | s1   |
| 0415-0025  | Enterprise | 0         | s0   | -    | -    | -    | -    | s0   | s0   | -    | s0   | -    | -   | s0   | 0    | 0    | 0    | s0   |
| 0416-0008  | Honeycrisp | 0         | 0    | -    | -    | -    | -    | 0    | 0    | -    | 0    | -    | -   | 0    | -    | -    | -    | 0    |
| 0416-0008  | Fuji       | 0         | 0    | -    | -    | 0    | 1    | -    | 0    | -    | 0    | -    | -   | 0    | 0    | 0    | 0    | 0    |
| 0416-0009  | Honeycrisp | 0         | s1   | -    | -    | -    | -    | 1    | s1   | -    | s1   | -    | -   | s1   | -    | -    | -    | s1   |
| 0416-0009  | Fuji       | 0         | s0   | -    | -    | 0    | 1    | -    | s0   | -    | s0   | -    | -   | s0   | 0    | 0    | 0    | s0   |

# Resolving DR

## 8. Check genotype calls with GenomeStudio®

-e.g. incorrect clustering of “AA” as “AB” ->

“AB” (actually “AA”) x “AB” -> 100% “AB” (actually 50% “AA” and 50% “AB”)

\*does not lead to PPC errors

\*often characterized by many DR in a single or few families

\*often characterized by a single marker involved in DR

-single genotyping error in individual

\*does not lead to PPC errors

\*often characterized by many DR in offspring of this individual

\*often characterized by a single marker involved in DR

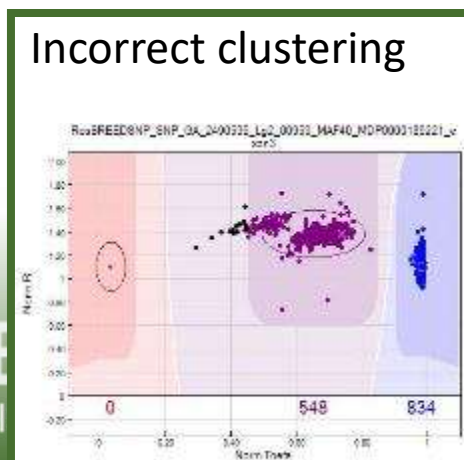

Rose  
DISEASE RESI

# Resolving DR

9.a Check for errors in map order using the “Segregation Indicator Pattern” tab

Moving marker(s) a few positions resolves DR

- \*Characterized by DR in a few individuals who are not necessarily related
- \*Characterized by DR spanning one or multiple markers
- \*Often characterized by a third recombination nearby  
moving markers to this recombination would solve DR

| 4177 | 1964 | 201 | 4581 | 7850 | 737 | 6127 | 2565 | 4112 | 4209 | 7461 | 3225  | 3252  | 545   | 5058  |
|------|------|-----|------|------|-----|------|------|------|------|------|-------|-------|-------|-------|
| 0    | 0    | 0   | 0    | 0    | 0   | 0    | 0    | 0    | 0    | 0    | 0.877 | 1.912 | 1.912 | 1.912 |
| 0    | 0    | -   | -    | s0   | -   | -    | -    | 0    | -    | -    | -     | -     | -     | -     |
| 1    | -    | 1   | 1    | s1   | 1   | -    | 1    | -    | -    | -    | 1     | 1     | 1     | -     |
| 1    | 1    | -   | -    | s1   | -   | -    | -    | 1    | -    | -    | -     | -     | -     | -     |
| 1    | -    | 0   | 0    | s1   | 1   | 1    | 1    | -    | -    | -    | 0     | 0     | 0     | -     |
| 1    | 1    | -   | -    | s1   | -   | -    | -    | -    | -    | -    | -     | -     | -     | -     |

DR

3<sup>rd</sup> recombination

Moving markers “201” and “4581” behind marker “2565” would resolve these DR

\*This cannot create new DR for other individuals (next slide)



# Resolving DR

9.b Adjust marker position and check if no new DR are created

9.b.1 Open “SIP\_Population\_X.csv” in FlexQTL project folder  
\*“X” is highest number found in folder

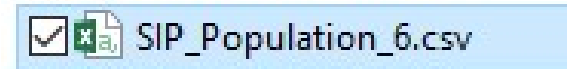

\*Interpretation the same as “Segregation Indicator Pattern” tab of Visual FlexQTL™

9.b.2 Use conditional formatting to color “0”/“s0” yellow and “1”/“s1” blue

\*same coloring as “Segregation Indicator Pattern” tab of Visual FlexQTL™

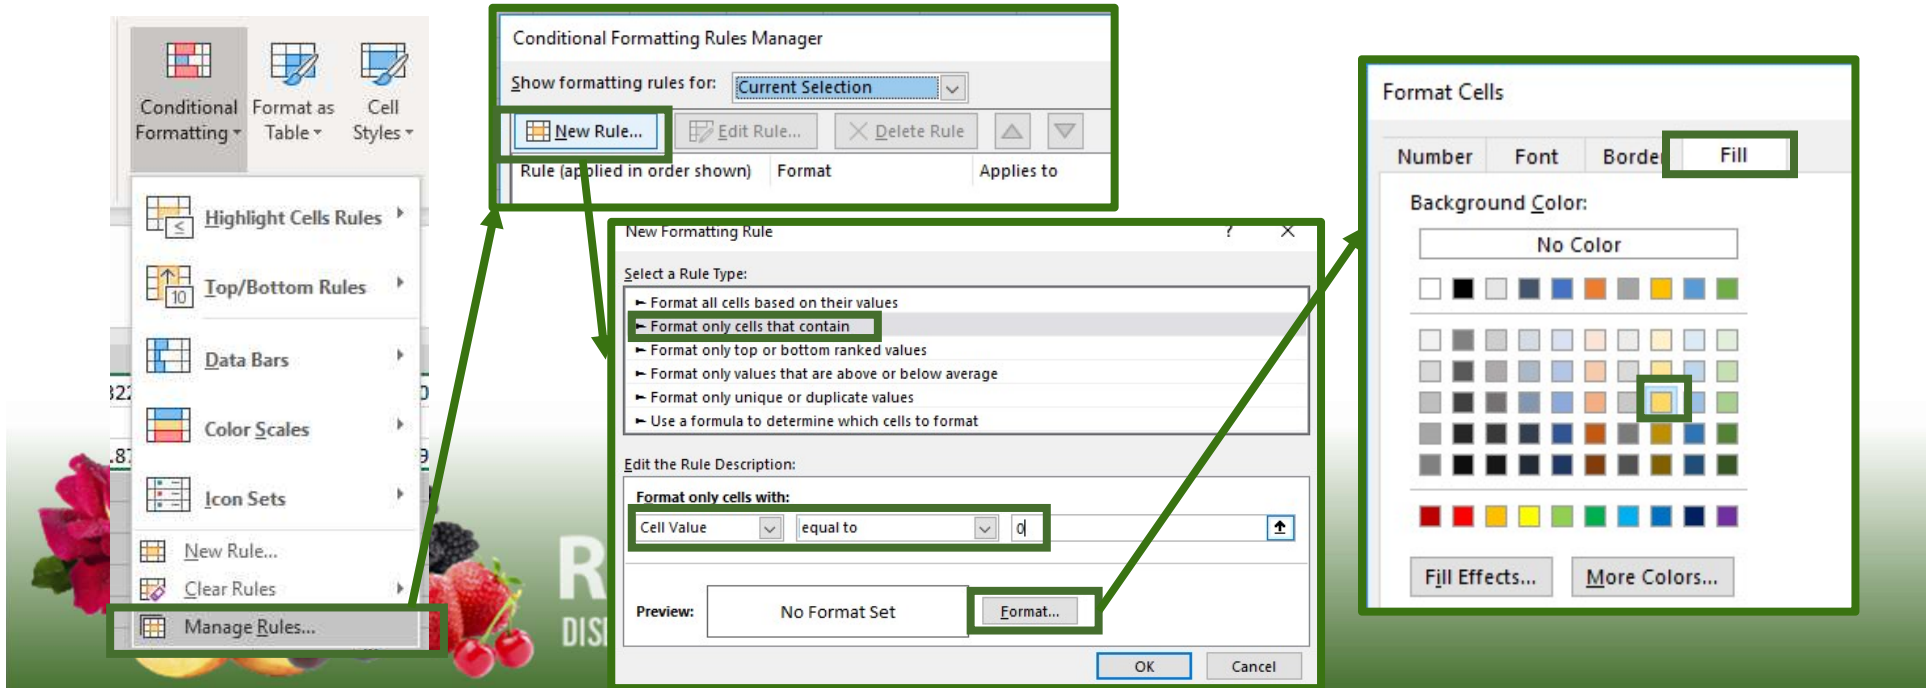A composite screenshot illustrating the steps to create a conditional formatting rule in Excel. The 'Conditional Formatting' ribbon is shown on the left. The 'Conditional Formatting Rules Manager' dialog box is open, with 'New Rule...' highlighted. The 'New Formatting Rule' dialog box is also open, showing 'Format only cells that contain' selected under 'Select a Rule Type'. The 'Edit the Rule Description' section shows 'Cell Value' selected, 'equal to' in the operator dropdown, and '0' in the text box. The 'Format...' button is highlighted. To the right, the 'Format Cells' dialog box is open, with the 'Fill' tab selected and a yellow color chosen from the 'Background Color' palette. Green arrows indicate the flow from the ribbon to the Rules Manager, then to the New Rule dialog, then to the Format Cells dialog, and finally to the 'Format...' button in the New Rule dialog.

# Resolving DR

9.b Adjust marker position and check if no new DR are created

9.b.1 Open “SIP\_Population\_X.csv” in FlexQTL project folder  
\*“X” is highest number found in folder



\*Interpretation the same as “Segregation Indicator Pattern” tab of Visual FlexQTL™

9.b.2 Use conditional formatting to color “0”/“s0” yellow and “1”/“s1” blue

\*same coloring as “Segregation Indicator Pattern” tab of Visual FlexQTL™

The image illustrates the process of creating a conditional formatting rule in Excel. It shows the 'Conditional Formatting' ribbon, the 'Conditional Formatting Rules Manager' dialog box, the 'New Formatting Rule' dialog box, and the 'Format Cells' dialog box. Green boxes and arrows highlight the 'New Rule...' button, the 'Format only cells that contain' rule type, the 'Cell Value equal to d' configuration, and the 'Format...' button in the preview section.

# Resolving DR

9.b.3 Cut columns of markers to move and insert them into new position

|          | D | H    | I | J   | K    | L    | M   | N    | O    | P    |      |
|----------|---|------|---|-----|------|------|-----|------|------|------|------|
| marker   |   | 1964 |   | 201 | 4581 | 7850 | 737 | 6127 | 2565 | 4112 | 4209 |
| group    |   | 1    |   | 1   | 1    | 1    | 1   | 1    | 1    | 1    | 1    |
| position |   | 0    |   | 0   | 0    | 0    | 0   | 0    | 0    | 0    | 0    |
| 48       |   | 1    |   |     | 1    |      |     |      | 1    |      |      |
| 48       |   |      |   | 0   | 0    | 1    |     | 1    |      |      |      |
| 48       |   | 1    |   |     | 1    |      |     |      | 1    |      |      |
| 48       |   |      |   | 0   | 0    | 0    |     | 0    |      |      |      |
| 48       |   | 1    |   |     | 1    |      |     |      | 1    |      |      |
| 48       |   |      |   | 1   | 1    | 1    |     | 1    |      |      |      |

  

|          | K | L    | M    | N   | O    | P    |      |
|----------|---|------|------|-----|------|------|------|
| er       |   | 6127 | 2565 | 201 | 4581 | 4112 | 4209 |
| group    |   | 1    | 1    | 1   | 1    | 1    | 1    |
| position |   | 0    | 0    | 0   | 0    | 0    | 0    |
| 48       |   |      |      |     | 1    |      |      |
| 48       |   |      | 1    | 0   | 0    |      |      |
| 48       |   |      |      |     |      | 1    |      |
| 48       |   |      | 0    | 0   | 0    |      |      |
| 48       |   |      |      |     |      | 1    |      |
| 48       |   |      | 1    | 1   | 1    |      |      |

9.b.4 Check rest of the file (rows) to make sure this move did not create additional DR

9.b.5 Update “.dat” and “.map” file to reflect the change in marker positions



**RosBREED**  
DISEASE RESISTANCE × HORTICULTURAL QUALITY

# Resolving DR

## 10. Check for phasing issues

- \* Often characterized by DR in almost all offspring of a single individual
- \* Individuals is often a founder (parents not genotyped)
- \* One or more offspring have a single recombination for same marker(s)
- \* Incorrect phasing of this individual causes errors for sibs

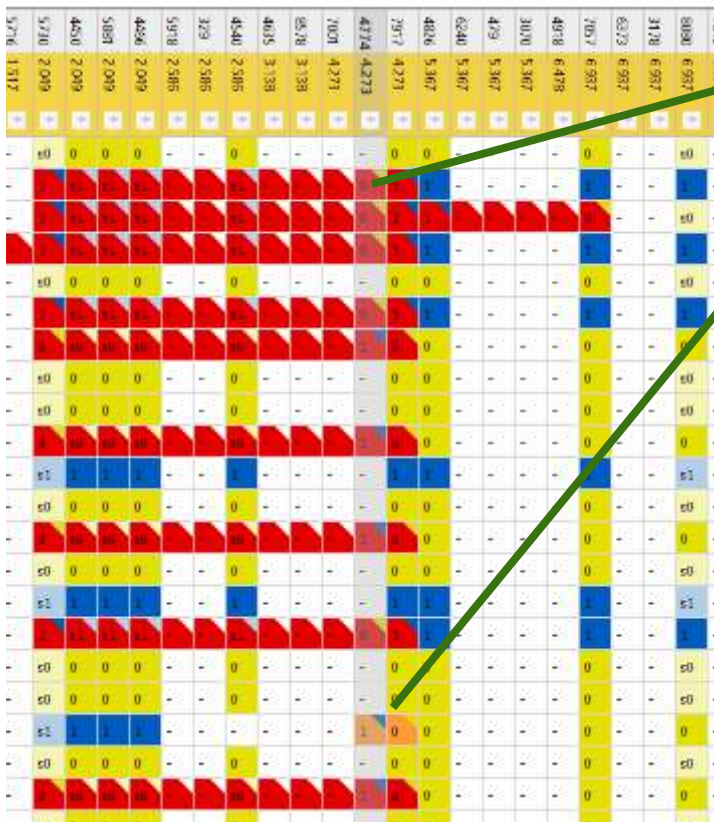

Marker always involved in DR

One individual with single recombination

\* Make genotypic data of this individual missing (gets imputed again in later stages)

### Probable cause: minimizing recombination interval

Incorrect phasing – short recombination interval

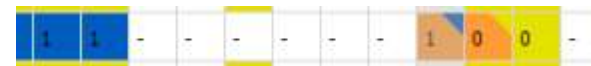

Correct phasing – long recombination interval

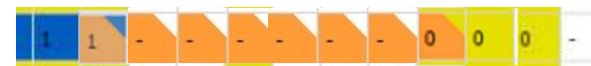

# Resolving DR

11. Re-run FlexQTL™ and re-generate “DoubleRecombinations.csv” file with Visual FlexQTL™ after resolving major DR

\*Resolving DR may resolve other nearby DR

12. Repeat these steps until remaining DR are very likely true

\*Unlike Mendelian-inconsistent errors, some DR can remain



**RosBREED**

DISEASE RESISTANCE × HORTICULTURAL QUALITY



United States  
Department of  
Agriculture

National Institute  
of Food and  
Agriculture

# Haploblocking and haplotyping

## RosBREED

DISEASE  
RESISTANCE



HORTICULTURAL  
QUALITY



SUPERIOR  
CULTIVARS







United States  
Department of  
Agriculture

National Institute  
of Food and  
Agriculture

# Generating haploblocks

## RosBREED

DISEASE  
RESISTANCE



HORTICULTURAL  
QUALITY



SUPERIOR  
CULTIVARS



# Adjusting input files

- Accurate phasing requires:
  - Removal of intermediate ungenotyped progenitors
    - Well-represented ancestors (>3 offspring) whose genotype can be imputed can remain
- Haploblock determination based on historical recombination requires:
  - All individuals that need to be taken into account to have offspring in data set



**RosBREED**  
DISEASE RESISTANCE × HORTICULTURAL QUALITY

# Adjusting input files

1. Remove any parentage information of ungenotyped intermediate progenitors from FlexQTL™ data input file

- \*Ungenotyped founders (no known parents) can stay in data set

- \*Ungenotyped progenitors with more than 3 genotyped offspring can stay in data set

2. Add dummy offspring to FlexQTL™ data input file for any individual whose recombination are important for haploblock determination (e.g. breeding selections) that don't have any offspring in the data set

- \*Set genotypic data of dummy individuals to missing

- \*Set parents of dummy individuals to individuals who need offspring in data set



**RosBREED**

DISEASE RESISTANCE × HORTICULTURAL QUALITY

# Creating haploblocks

3. Create a new FlexQTL™ project and use following settings

- skipSampleMarkers: 0
- REDprint: 0
- Markerblock: 5
- MSegDelta: 1
- DeleteDR: 1

4. Run FlexQTL™

5. Generate haploblock delimitation with Visual FlexQTL™ (Tools>Export>Export haplotype blocks file then select directory to save file in)

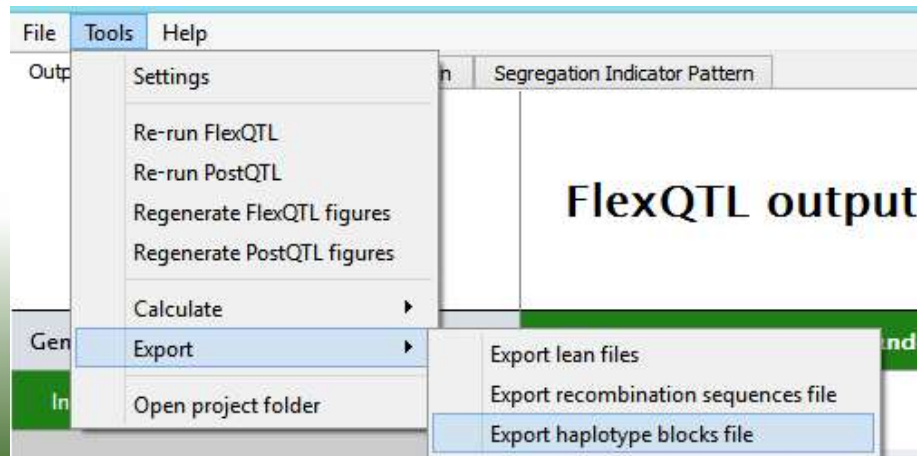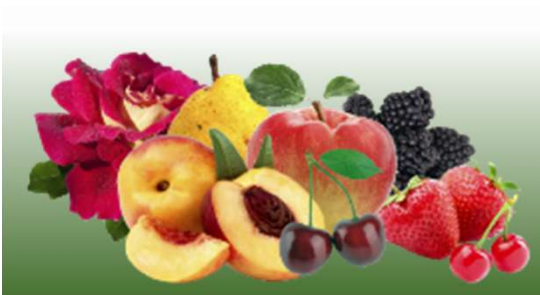

# Creating haploblocks

6. Open generated HaploBlock.map file

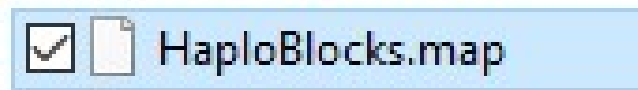

7. Adjust Haploblock designations as wanted  
e.g. to ensure maximum size of haploblock is 1 cM

| Marker | Chromosome | Position | Haploblock |
|--------|------------|----------|------------|
| 1897   | 1          | 0        | HB-01-1    |
| 5444   | 1          | 0        | HB-01-1    |
| 4177   | 1          | 0        | HB-01-2    |
| 1964   | 1          | 0        | HB-01-2    |
| 201    | 1          | 0        | HB-01-2    |
| 4581   | 1          | 0        | HB-01-2    |

Assigned haploblock  
\*name can be  
changed freely

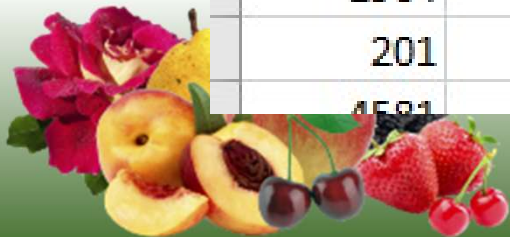

**ROSBREED**  
DISEASE RESISTANCE × HORTICULTURAL QUALITY



United States  
Department of  
Agriculture

National Institute  
of Food and  
Agriculture

# Determining haplotypes

## RosBREED

DISEASE  
RESISTANCE



HORTICULTURAL  
QUALITY



SUPERIOR  
CULTIVARS





# Creating input files

1. Remove dummy offspring from FlexQTL™ data input file used for haploblock determination
2. Create a new FlexQTL™ project and use following settings
  - skipSampleMarkers: 0
  - REDprint: 0
  - Markerblock: 5
  - MSegDelta: 1
  - DeleteDR: 1
3. Run FlexQTL™



**RosBREED**  
DISEASE RESISTANCE × HORTICULTURAL QUALITY

# Creating input files

4. Copy needed input files in a single folder

\*From latest FlexQTL™ run:

- mhaplotypes.csv
- flexqtl.par
- flexqtl.sort

\*From FlexQTL™ run to determine haploblocks:

- Generated (and adjusted) haploblocks.map

5. Create a new R project in the same folder to run PediHaplotyper

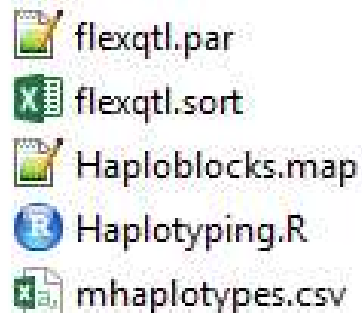

**RosBREED**  
DISEASE RESISTANCE × HORTICULTURAL QUALITY

# Running PediHaplotyper

6. In RStudio, install PediHaplotyper as a package (only needed once)

\*Tools>Install Packages...

\*Install from: "Package Archive" and Browse to find "PediHaplotyper\_1.tar.gz"

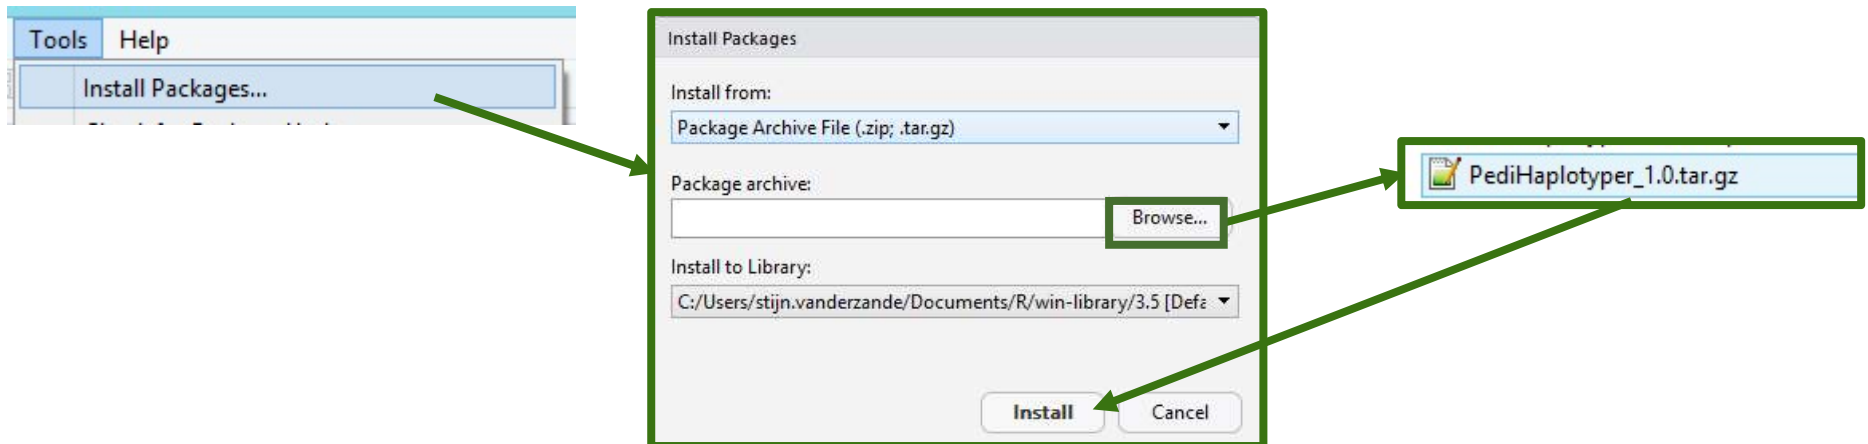

7. Set working directory to "Source File Location"

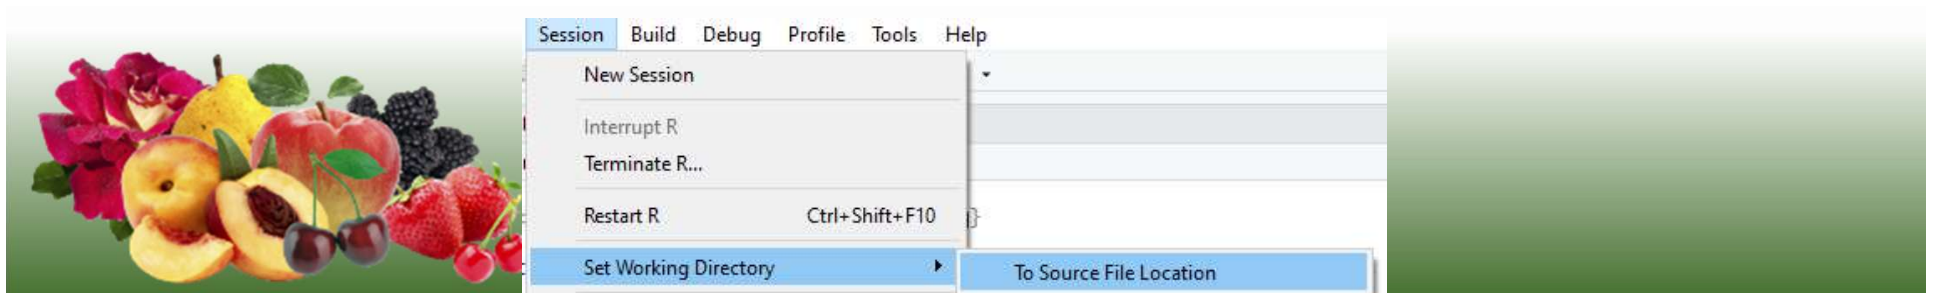

# Running PediHaplotyper

8. Run the following code

```
1 library(PediHaplotyper)
2
3 fq_haplotyping_session(sessionID="20180613_HTDet_All" mapfile="Haploblocks.map")
4
```



Prefix for all output files

Name of haploblock definition file

```
> fq_haplotyping_session(sessionID="20180613_HTDet_All", mapfile="Haploblocks.map")
reading datafiles ...
hb 1 = HB-01-1: 27 initial alleles
hb 2 = HB-01-1a: 3 initial alleles
hb 3 = HB-01-2: 25 initial alleles
-----
writing initial HS family haploblock alleles file ...
calculation haploblock alleles ...
hb 1 = HB-01-1: convergence = yes in 4 cycles
hb 2 = HB-01-1a: convergence = yes in 2 cycles
hb 3 = HB-01-2: convergence = yes in 3 cycles
hb 4 = HB-01-3: convergence = yes in 3 cycles
-----
hb 503 = HB-17-52: convergence = yes in 2 cycles
writing all requested output files ...
haplotyping session 20180613_HTDet_All finished.
>
```

# Output files

“orig”-flag vs “final”-flag

- “orig”: results after initial haplotype determination
- “final”: results add end of haplotype determination (use these files)

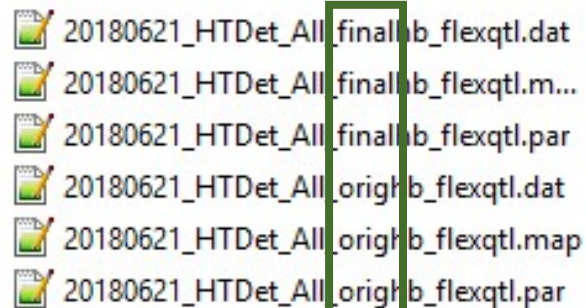

20180621\_HTDet\_All\_finalhb\_flexqtl.dat  
20180621\_HTDet\_All\_finalhb\_flexqtl.m...  
20180621\_HTDet\_All\_finalhb\_flexqtl.par  
20180621\_HTDet\_All\_orighb\_flexqtl.dat  
20180621\_HTDet\_All\_orighb\_flexqtl.map  
20180621\_HTDet\_All\_orighb\_flexqtl.par

“mrk”-flag vs “hb”-flag

- “mrk”: results at the single marker level
- “hb”: results at haplotype level (use these files)

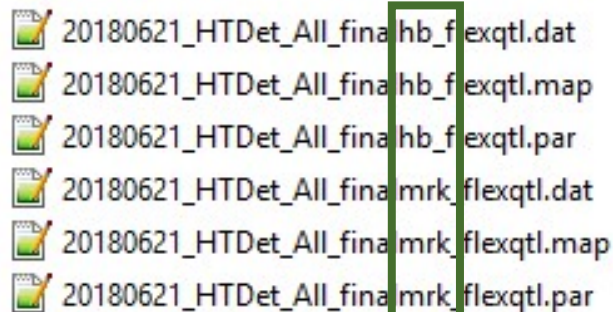

20180621\_HTDet\_All\_finalhb\_flexqtl.dat  
20180621\_HTDet\_All\_finalhb\_flexqtl.map  
20180621\_HTDet\_All\_finalhb\_flexqtl.par  
20180621\_HTDet\_All\_finalmrk\_flexqtl.dat  
20180621\_HTDet\_All\_finalmrk\_flexqtl.map  
20180621\_HTDet\_All\_finalmrk\_flexqtl.par



Ro  
DISEASE RESISTANCE × HORTICULTURAL QUALITY

# Output files

-All three FlexQTL™ input files (".dat", ".map", and ".par") created for each combination

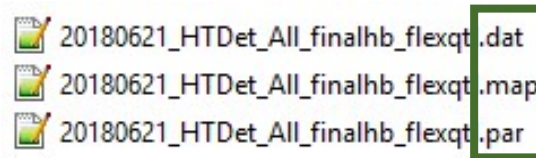

-Pedimap input file (".ped") created for each combination

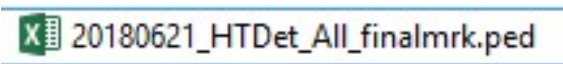

- "[...] \_hballeles.dat" gives definition of each haplotype for each haploblock

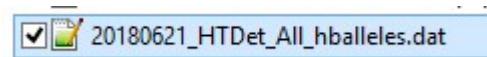

Haploblock number and name

Marker names within haploblock

Number of markers in haploblock

Marker alleles that create haplotype

| hbnr | haploblock | markercount | hballeleID | hballelenr | nacount | freq | 4177 | 1897 | 1964 | 7850 |
|------|------------|-------------|------------|------------|---------|------|------|------|------|------|
| 1    | HB-01-1    | 4           | 1          | 1          | 4       | 214  | -    | -    | -    | -    |
| 1    | HB-01-1    | 4           | 2          | 2          | 1       | 1    | -    | A    | A    | A    |
| 1    | HB-01-1    | 4           | 3          | 3          | 1       | 6    | -    | B    | B    | A    |
| 1    | HB-01-1    | 4           | 4          | 4          | 0       | 794  | B    | A    | A    | A    |

Haplotype name and number

Missing values within haplotype

How often haplotype occurs in data set





United States  
Department of  
Agriculture

National Institute  
of Food and  
Agriculture

# Checking for errors in haplotypes

## RosBREED

DISEASE  
RESISTANCE



HORTICULTURAL  
QUALITY



SUPERIOR  
CULTIVARS



# Mendelian-inconsistent errors

1. Use “[...]\_finalhb” FlexQTL™ input files generated by PediHaplotyper to create a new FlexQTL™ project
  - \*parameter file should be renamed to “flexqtl.par”
2. Use “mconsistency.csv” file to identify issues
3. Use “[...]\_hballeles.dat” file to investigate haplotypes that cause P(P)C errors
  - 3.a If missing data within haplotype causes inconsistency: assign correct haplotype (if both parental haplotypes are possible, use information on flanking markers and minimize recombinations)

| GoldenDel |                |   |         |         |         |           |          |          |  |  |
|-----------|----------------|---|---------|---------|---------|-----------|----------|----------|--|--|
| mchr      |                |   | 9       | 9       | 9       | 9         | 9        | 9        |  |  |
| mpos      |                |   | 4.538   | 4.821   | 6.61    | 7.602     | 7.602    | 9.2      |  |  |
| ID        | VAR            |   | HB-09-7 | HB-09-8 | HB-09-9 | HB-09-10a | HB-09-10 | HB-09-11 |  |  |
| GoldenDel | Grimes_Gc hap1 | 1 | 3       | 3       | 2       | 2         | 4        |          |  |  |
| GoldenDel | F_GoldenL hap2 | 1 | 4       | 4       | 2       | 3         | 5        |          |  |  |
| MN1627    | GoldenDel hap2 | 1 | -       | -       | 2       | -         | -        |          |  |  |
| Splendour | GoldenDel hap1 | 1 | 3       | 3       | 2       | 2         | 4        |          |  |  |
| Pinova    | GoldenDel hap2 | 1 | 4       | 4       | 2       | 3         | 6        |          |  |  |
| PRI14-152 | GoldenDel hap1 | 1 | 4       | 4       | 2       | 3         | 5        |          |  |  |

Haplotype 6 equals haplotype 5 except for a missing value

|   | HB-09-10 | 439 | 6324 | 3144 | 6325 | 3146 |
|---|----------|-----|------|------|------|------|
| 4 | A        | B   | A    | B    | A    |      |
| 5 | B        | B   | A    | A    | B    |      |
| 6 | B        | B   | A    | A    | -    |      |

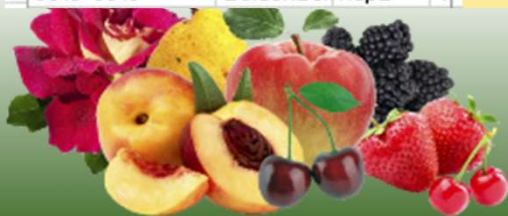

RosBR  
DISEASE RESISTANCE

# Mendelian-inconsistent errors

3.b If a recombination occurs within haploblock:

3.b.1 if recombination occurs within selected material: adjust haploblock borders in “haploblock.map” file and re-determine haplotypes for adjusted haploblocks

3.b.2 if recombination occurs in seedling: don't adjust haploblock borders and do not adjust haplotype (or make it missing)

|      | A         | B         | C    | D | T        | Z         | MM       | MB       | ML        | MD       |
|------|-----------|-----------|------|---|----------|-----------|----------|----------|-----------|----------|
| 1    | Splendour |           |      |   |          |           |          |          |           |          |
| 2    | mchr      |           |      |   | 1        | 1         | 1        | 1        | 1         |          |
| 3    | mpos      |           |      |   | 22.387   | 23.021    | 23.554   | 24.678   | 24.89     | 2        |
| 4    | ID        | VAR       |      |   | HB-01-19 | HB-01-19a | HB-01-20 | HB-01-21 | HB-01-21a | HB-01-22 |
| 65   | Splendour | GoldenDel | hap1 | 1 | 4        | 4         | 4        | 4        | 3         |          |
| 66   | Splendour | Delicious | hap2 | 1 | 10       | 7         | 5        | 5        | 2         |          |
| 3286 | Sciros    | Splendour | hap2 | 1 | 4        | 4         | 4        | 6        | 2         |          |

| HB-01-21 | 1970 | 4277 | 131 | 2566 | 6846 |
|----------|------|------|-----|------|------|
| 4        | A    | B    | A   | A    | A    |
| 5        | A    | B    | B   | A    | B    |
| 6        | A    | B    | A   | A    | B    |

Recombination within HB

# Mendelian-inconsistent errors

- 3.c If a genotype calling error occurred (check with GenomeStudio<sup>®</sup>): adjust haplotype to resemble correct genotype call
- 3.d If a marker order is incorrect: adjust marker order in “haploblock.map” file, and latest data and map file for single marker level. Re-run FlexQTL<sup>™</sup> to create new PediHaplotyper files and rerun pedihaplotyper for affected haploblocks



**RosBREED**  
DISEASE RESISTANCE × HORTICULTURAL QUALITY

# Mendelian-consistent errors

4. Once Mendelian-inconsistent errors are resolved, check for Mendelian-consistent errors as was done for single marker level
5. Resolve Mendelian-consistent errors as was done for Mendelian-inconsistent errors with haplotypes
6. Enjoy your high-quality genotypic data set and make lots of great discoveries!!



**RosBREED**  
DISEASE RESISTANCE × HORTICULTURAL QUALITY
